# Supplementary material for: Genomic and Phenotypic Analyses of Acinetobacter baumannii Isolates From Three Tertiary Care Hospitals in Thailand
Source: Front Microbiol. 2020 Apr 6;11:548. doi: 10.3389/fmicb.2020.00548 (PMC7153491; doi:10.3389/fmicb.2020.00548)
Supplement: TABLES S1–S6 — Properties of A. baumannii isolates. [file Data_Sheet_2.xlsx]

## Sheet: TableS1
Strain/sanger_ID	Hospital	Sample source	Assembly	Sample	Year	Country	ST_Pasteur_MLST	ERR	ERS	Contigs	K_Locus	OCL_locus	p4ABAYE0001_p4ABAYE_CU459139	pRCH51_3_KY216144	pXBB1_2_CP010353	RepApAB49_pAB49_L77992	repAci3_p203_GU978997	repA_AB_pABIR_EU294228	pA297_3_parA_KU744946	pAB3_CP012005	pRAY__unknownorf_JQ904627	repAci6_pA85_3_KJ493819	p3ABAYE0002_p3ABAYE_CU459140	pD46_4_CP012956	repAci5_p537_GU978999	pABTJ2_NC_020524	repAci4_p844_GU978998	repAci7_p736_GU978996	p1ABAYE0001_p1ABAYE_CU459137	repAci1_pAbG7_1_KJ586856	repAci2_pABVA01_FM210331	repAciX_pACICU1_CP000864	repM_Aci9_pMAC_AY541809	pNaval81_26_NZ_AFDB02000003.1	Aac3-Iia	Aac3-I	AacAad	AadA	AadB	Aph3-Ia	Aph4-Ia	AphA6	ArmA	RmtB	StrA	StrB	BlaA1	BlaA2	CARB
24276_2#154	Siriraj	sputum	GCF_900494515.1	AB12	2016	Thailand	2	ERR2618868	ERS1930162	UFGV01000001-UFGV01000058	KL10	OCL1	no	no	no	no	no	no	no	no	no	no	no	no	no	no	no	no	no	yes	no	no	no	no	0	0	0	0	0	0	0	0	1	0	1	1	1	1	0
24276_2#160	Siriraj	NA	GCF_900494555.1	AB18	2016	Thailand	2	ERR2618874	ERS1930168	UFGW01000001-UFGW01000051	KL10	OCL1	no	no	no	no	no	no	no	no	no	yes	no	no	no	no	no	no	no	yes	no	no	no	no	0	0	0	0	0	1	0	0	1	0	1	1	0	1	0
24276_2#167	Siriraj	NA	GCF_900494825.1	AB25	2016	Thailand	2	ERR2618881	ERS1930175	UFHY01000001-UFHY01000044	KL10	OCL1	no	no	no	no	no	no	no	no	no	no	no	no	no	no	no	no	no	yes	no	no	no	no	0	0	0	0	0	1	0	0	1	0	1	1	1	1	0
24276_2#169	Siriraj	NA	GCF_900494845.1	AB27	2016	Thailand	2	ERR2618883	ERS1930177	UFIF01000001-UFIF01000065	KL10	OCL1	no	no	no	no	no	no	no	no	no	yes	no	no	no	no	no	no	no	yes	no	no	no	no	0	0	0	0	0	0	0	0	1	0	1	1	0	1	0
24276_2#186	Siriraj	NA	GCF_900495035.1	AB44	2016	Thailand	2	ERR2618900	ERS1930194	UFIS01000001-UFIS01000047	KL10	OCL1	no	no	no	no	no	no	no	no	no	no	no	no	no	no	no	no	no	yes	no	no	no	no	0	0	0	0	0	0	0	0	1	0	0	0	1	1	0
24276_2#194	Siriraj	NA	GCF_900495255.1	AB52	2016	Thailand	2	ERR2618908	ERS1930202	UFJQ01000001-UFJQ01000065	KL10	OCL1	no	no	no	yes	no	no	no	no	no	yes	no	no	no	no	no	no	no	yes	no	no	no	no	0	0	0	0	0	0	0	0	1	0	1	1	1	1	0
24276_2#198	Siriraj	NA	GCF_900495185.1	AB56	2016	Thailand	2	ERR2618912	ERS1930206	UFJI01000001-UFJI01000062	KL10	OCL1	no	no	no	no	no	no	no	no	no	no	no	no	no	no	no	no	no	yes	no	no	no	no	0	0	0	0	0	0	0	0	1	0	1	1	1	1	0
24276_2#201	Siriraj	NA	GCF_900495175.1	AB59	2016	Thailand	2	ERR2618915	ERS1930209	UFJD01000001-UFJD01000043	KL10	OCL1	no	no	no	no	no	no	no	no	no	yes	no	no	no	no	no	no	no	yes	no	no	no	no	0	0	0	0	0	1	0	0	1	0	1	1	1	1	0
24276_2#203	Siriraj	NA	GCF_900495095.1	AB61	2016	Thailand	2	ERR2618917	ERS1930211	UFJB01000001-UFJB01000064	KL10	OCL1	no	no	no	no	no	no	no	no	no	yes	no	no	no	no	no	no	no	yes	no	no	no	no	0	0	0	0	0	0	0	0	1	0	1	1	1	1	0
24276_2#204	Siriraj	NA	GCF_900495085.1	AB62	2016	Thailand	2	ERR2618918	ERS1930212	UFJK01000001-UFJK01000082	KL10	OCL1	no	no	no	no	no	no	no	no	no	yes	no	no	no	no	no	no	no	yes	no	no	no	no	0	0	0	0	0	0	0	0	1	0	1	1	1	1	0
24276_2#206	Siriraj	NA	GCF_900495165.1	AB64	2016	Thailand	2	ERR2618920	ERS1930214	UFJM01000001-UFJM01000066	KL10	OCL1	no	no	no	no	no	no	no	no	no	yes	no	no	no	no	no	no	no	yes	no	no	no	no	0	0	0	0	0	0	0	0	1	0	1	1	1	1	0
24276_2#227	Siriraj	NA	GCF_900495455.1	AB85	2016	Thailand	2	ERR2618941	ERS1930235	UFKH01000001-UFKH01000068	KL10	OCL1	no	no	no	no	no	no	no	no	no	no	no	no	no	no	no	no	no	yes	no	no	no	no	0	0	0	0	0	1	0	0	1	0	1	1	1	1	0
24276_2#235	Siriraj	NA	GCF_900495395.1	AB93	2016	Thailand	2	ERR2618949	ERS1930243	UFKA01000001-UFKA01000047	KL10	OCL1	no	no	no	no	no	no	no	no	no	no	no	no	no	no	no	no	no	yes	no	no	no	no	0	0	0	0	0	1	0	0	1	0	1	1	1	1	0
24276_2#247	TU	sputum	GCF_900495695.1	ABMYSP-109	2016	Thailand	2	ERR2618961	ERS1930255	UFLL01000001-UFLL01000064	KL10	OCL1	no	no	no	no	no	no	no	no	no	no	no	no	no	no	no	no	no	yes	no	no	no	no	0	0	0	0	0	1	0	0	1	0	1	1	1	1	0
24276_2#250	TU	Blood	GCF_900495715.1	ABMYH-1245	2016	Thailand	2	ERR2618964	ERS1930258	UFLB01000001-UFLB01000070	KL10	OCL1	no	no	no	no	no	no	no	no	no	no	no	no	no	no	no	no	no	yes	no	no	no	no	0	0	0	0	0	1	0	0	1	0	1	1	0	1	0
24276_2#274	TU	sputum	GCF_900495915.1	ABAPSP-55	2016	Thailand	2	ERR2618988	ERS1930282	UFMG01000001-UFMG01000137	KL10	OCL1	no	no	no	yes	no	no	no	no	no	no	no	no	no	no	no	no	no	yes	no	no	no	no	0	0	0	0	0	1	0	0	1	0	1	1	1	1	0
24276_2#275	TU	sputum	GCF_900495905.1	ABAPSP-64	2016	Thailand	2	ERR2618989	ERS1930283	UFME01000001-UFME01000073	KL10	OCL1	no	no	no	yes	no	no	no	no	no	no	no	no	no	no	no	no	no	yes	no	no	no	no	0	0	0	0	0	1	0	0	1	0	1	1	1	1	0
24276_2#292	TU	sputum	GCF_900496025.1	ABMYSP-182	2016	Thailand	2	ERR2619006	ERS1930300	UFMT01000001-UFMT01000062	KL10	OCL1	no	no	no	no	no	no	no	no	no	no	no	no	no	no	no	no	no	yes	no	no	no	no	0	0	0	0	0	1	0	0	1	0	1	1	1	1	0
24276_2#293	TU	sputum	GCF_900496085.1	ABMYSP-187	2016	Thailand	2	ERR2619007	ERS1930301	UFMR01000001-UFMR01000086	KL10	OCL1	no	no	no	no	no	no	no	no	no	no	no	no	no	no	no	no	no	yes	no	no	no	no	0	0	0	0	0	1	0	0	1	0	1	1	1	1	0
24276_2#234	Siriraj	NA	GCF_900495485.1	AB92	2016	Thailand	2	ERR2618948	ERS1930242	UFKF01000001-UFKF01000047	KL125	OCL1	no	no	no	no	no	no	no	no	no	no	no	no	no	no	no	no	no	yes	no	no	no	no	0	0	0	0	0	1	0	0	1	0	1	1	1	1	0
24276_2#159	Siriraj	NA	GCF_900494495.1	AB17	2016	Thailand	2	ERR2618873	ERS1930167	UFHB01000001-UFHB01000044	KL2	OCL1	no	no	no	no	no	no	no	no	no	yes	no	no	no	no	no	no	no	yes	no	no	no	no	0	0	0	0	0	0	0	0	1	0	1	1	1	1	0
24276_2#165	Siriraj	NA	GCF_900494805.1	AB23	2016	Thailand	2	ERR2618879	ERS1930173	UFID01000001-UFID01000047	KL2	OCL1	no	no	no	no	no	no	no	no	no	yes	no	no	no	no	no	no	no	yes	no	no	no	no	0	0	0	0	0	1	0	0	1	0	1	1	1	1	0
24276_2#177	Siriraj	NA	GCF_900494965.1	AB35	2016	Thailand	2	ERR2618891	ERS1930185	UFII01000001-UFII01000047	KL2	OCL1	no	no	no	no	no	no	no	no	no	yes	no	no	no	no	no	no	no	yes	no	no	no	no	0	0	0	0	0	1	0	0	1	0	1	1	1	1	0
24276_2#178	Siriraj	NA	GCF_900494945.1	AB36	2016	Thailand	2	ERR2618892	ERS1930186	UIRI01000001-UIRI01000086	KL2	OCL1	no	no	no	no	no	no	no	no	no	yes	no	no	no	no	no	no	no	yes	no	no	no	no	0	0	0	0	0	1	0	0	1	0	1	1	1	1	0
24276_2#179	Siriraj	NA	GCF_900494895.1	AB37	2016	Thailand	2	ERR2618893	ERS1930187	UFIC01000001-UFIC01000057	KL2	OCL1	no	no	no	no	no	no	no	no	no	yes	no	no	no	no	no	no	no	yes	no	no	no	no	0	0	0	0	0	1	0	0	1	0	1	1	1	1	0
24276_2#184	Siriraj	NA	GCF_900494885.1	AB42	2016	Thailand	2	ERR2618898	ERS1930192	UFIB01000001-UFIB01000050	KL2	OCL1	no	no	no	no	no	no	no	no	no	yes	no	no	no	no	no	no	no	yes	no	no	no	no	0	0	0	0	0	1	0	0	1	0	1	1	1	1	0
24276_2#202	Siriraj	NA	GCF_900495215.1	AB60	2016	Thailand	2	ERR2618916	ERS1930210	UFJL01000001-UFJL01000055	KL2	OCL1	no	no	no	no	yes	no	no	no	yes	yes	no	no	no	no	no	no	no	yes	no	no	no	no	0	0	0	0	0	1	0	0	1	0	1	1	1	1	0
24276_2#226	Siriraj	NA	GCF_900495525.1	AB84	2016	Thailand	2	ERR2618940	ERS1930234	UFKK01000001-UFKK01000067	KL2	OCL1	no	no	no	no	no	no	no	no	no	yes	no	no	no	no	no	no	no	yes	no	no	no	no	0	0	0	0	0	1	0	0	1	0	1	1	1	1	0
24276_2#288	TU	sputum	GCF_900496045.1	ABMYSP-28	2016	Thailand	2	ERR2619002	ERS1930296	UFMQ01000001-UFMQ01000099	KL2	OCL1	no	no	no	no	no	no	no	no	no	no	yes	no	no	no	no	no	no	yes	no	no	no	no	1	0	0	1	1	0	0	1	0	0	0	0	0	1	1
24276_3#14	Songkla	sputum	GCF_900496375.1	AB1039	2016	Thailand	2	ERR2619034	ERS1930328	UFNU01000001-UFNU01000071	KL2	OCL1	no	no	no	yes	no	no	no	no	no	no	no	no	no	no	no	no	no	yes	no	no	no	no	0	0	0	0	0	1	0	0	1	0	1	1	1	1	0
24276_3#58	Songkla	NA	GCF_900496795.1	NPRC AB17	2016	Thailand	2	ERR2619078	ERS1930372	UFPJ01000001-UFPJ01000044	KL2	OCL1	no	no	no	no	no	no	no	no	no	no	no	no	no	no	no	no	no	yes	no	no	no	no	0	0	0	0	0	1	0	0	1	0	1	1	1	1	0
24276_3#41	Songkla	NA	GCF_900496585.1	NPRC AB2	2016	Thailand	2	ERR2619061	ERS1930361	UFOM01000001-UFOM01000019	KL28	OCL1	no	no	no	yes	no	no	no	no	no	no	no	no	no	no	no	no	no	yes	no	no	no	no	0	0	0	0	0	0	0	0	0	0	0	0	0	1	0
24276_2#153	Siriraj	sputum	GCF_900494695.1	AB11	2016	Thailand	2	ERR2618867	ERS1930161	UFIZ01000001-UFIZ01000051	KL3	OCL1	no	no	no	no	no	no	no	no	no	no	no	no	no	no	no	no	no	yes	no	no	no	no	0	0	0	0	0	1	0	0	1	0	1	1	1	1	0
24276_2#164	Siriraj	NA	GCF_900494905.1	AB22	2016	Thailand	2	ERR2618878	ERS1930172	UFHZ01000001-UFHZ01000053	KL3	OCL1	no	no	no	no	no	no	no	no	no	yes	no	no	no	no	no	no	no	yes	no	no	no	no	0	0	0	0	0	1	0	0	1	0	1	1	1	1	0
24276_2#207	Siriraj	NA	GCF_900495245.1	AB65	2016	Thailand	2	ERR2618921	ERS1930215	UFJN01000001-UFJN01000109	KL3	OCL1	no	no	no	no	no	no	no	no	no	yes	no	no	no	no	no	no	no	yes	no	no	no	no	0	0	0	0	0	0	0	0	1	0	1	1	1	1	0
24276_2#213	Siriraj	NA	GCF_900495285.1	AB71	2016	Thailand	2	ERR2618927	ERS1930221	UFJV01000001-UFJV01000047	KL3	OCL1	no	no	no	no	no	no	no	no	no	yes	no	no	no	no	no	no	no	yes	no	no	no	no	0	0	0	0	0	1	0	0	1	0	1	1	1	1	0
24276_2#214	Siriraj	NA	GCF_900495325.1	AB72	2016	Thailand	2	ERR2618928	ERS1930222	UFJS01000001-UFJS01000041	KL3	OCL1	no	no	no	no	no	no	no	no	no	no	no	no	no	no	no	no	no	yes	no	no	no	no	0	0	0	0	0	0	0	0	1	0	1	1	1	1	0
24276_2#233	Siriraj	NA	GCF_900495465.1	AB91	2016	Thailand	2	ERR2618947	ERS1930241	UFKE01000001-UFKE01000072	KL3	OCL1	no	no	no	no	no	no	no	no	no	no	no	no	no	no	no	no	no	yes	no	no	no	no	0	0	0	0	0	0	0	0	1	0	1	1	0	1	0
24276_2#265	TU	Blood	GCF_900495845.1	ABJNH-403	2016	Thailand	2	ERR2618979	ERS1930273	UFLX01000001-UFLX01000064	KL3	OCL1	no	no	no	no	no	no	no	no	no	yes	no	no	no	no	no	no	no	yes	no	no	no	no	0	0	0	0	0	1	0	0	1	0	1	1	1	1	0
24276_3#40	Songkla	NA	GCF_900496655.1	P130	2016	Thailand	2	ERR2619060	ERS1930360	UFOQ01000001-UFOQ01000044	KL3	OCL1	no	no	no	yes	no	no	no	no	no	no	yes	no	no	yes	no	no	no	yes	no	no	no	no	0	0	0	0	0	1	0	0	1	0	1	1	1	1	0
24276_3#56	Songkla	NA	GCF_900496855.1	NPRC AB13	2016	Thailand	2	ERR2619076	ERS1930370	UFPY01000001-UFPY01000056	KL3	OCL1	no	no	no	yes	no	no	no	no	no	no	yes	no	no	no	no	no	no	yes	no	no	no	no	0	0	0	0	0	1	0	0	1	0	1	1	1	1	0
24276_3#57	Songkla	NA	GCF_900496785.1	NPRC AB15	2016	Thailand	2	ERR2619077	ERS1930371	UFPK01000001-UFPK01000061	KL3	OCL1	no	no	no	yes	no	no	no	no	no	no	no	no	no	no	no	no	no	yes	no	no	no	no	0	0	0	0	0	1	0	0	1	0	1	1	1	1	0
24276_3#59	Songkla	NA	GCF_900496875.1	NPRC AB18	2016	Thailand	2	ERR2619079	ERS1930373	UFPZ01000001-UFPZ01000047	KL3	OCL1	no	no	no	no	no	no	no	no	no	no	no	no	no	no	no	no	no	yes	no	no	no	no	0	0	0	0	0	1	0	0	1	0	1	1	1	1	0
24276_2#157	Siriraj	sputum	GCF_900494665.1	AB15	2016	Thailand	2	ERR2618871	ERS1930165	UFHG01000001-UFHG01000042	KL47	OCL1	no	no	no	no	no	no	no	no	no	no	no	no	no	no	no	no	no	yes	no	no	no	no	0	0	0	0	0	1	0	0	1	0	1	1	1	1	0
24276_2#193	Siriraj	NA	GCF_900495145.1	AB51	2016	Thailand	2	ERR2618907	ERS1930201	UFJG01000001-UFJG01000050	KL47	OCL1	no	no	no	no	no	no	no	no	no	yes	no	no	no	no	no	no	no	yes	no	no	no	no	0	0	0	0	0	1	0	0	1	0	1	1	0	1	0
24276_2#220	Siriraj	NA	GCF_900495505.1	AB78	2016	Thailand	2	ERR2618934	ERS1930228	UFKL01000001-UFKL01000104	KL47	OCL1	no	no	no	no	no	no	no	no	no	no	no	no	no	yes	no	no	no	no	no	no	yes	no	0	0	1	1	0	1	0	0	1	0	1	1	1	1	0
24276_2#223	Siriraj	NA	GCF_900495515.1	AB81	2016	Thailand	2	ERR2618937	ERS1930231	UFKO01000001-UFKO01000105	KL47	OCL1	no	no	no	no	no	no	no	no	no	no	no	no	no	no	no	no	no	yes	no	no	no	no	0	0	0	0	0	1	0	0	1	0	1	1	1	1	0
24276_2#243	TU	Pus	GCF_900495585.1	ABAPP-61	2016	Thailand	2	ERR2618957	ERS1930251	UFKT01000001-UFKT01000047	KL47	OCL1	no	no	no	no	no	no	no	no	no	yes	no	no	no	no	no	no	no	yes	no	no	no	no	0	0	0	0	0	1	0	0	1	0	1	1	0	1	0
24276_2#150	Siriraj	sputum	GCF_900494395.1	AB8	2016	Thailand	2	ERR2618864	ERS1930158	UFGJ01000001-UFGJ01000048	KL49	OCL1	no	no	no	no	no	no	no	no	no	no	no	no	no	no	no	no	no	yes	no	no	no	no	0	0	0	0	0	0	0	0	1	0	1	1	1	1	0
24276_2#156	Siriraj	sputum	GCF_900494765.1	AB14	2016	Thailand	2	ERR2618870	ERS1930164	UFHI01000001-UFHI01000040	KL49	OCL1	no	no	no	no	no	no	no	no	no	no	no	no	no	no	no	no	no	yes	no	no	no	no	0	0	0	0	0	0	0	0	1	0	1	1	1	1	0
24276_2#171	Siriraj	NA	GCF_900494925.1	AB29	2016	Thailand	2	ERR2618885	ERS1930179	UFIL01000001-UFIL01000044	KL49	OCL1	no	no	no	no	no	no	no	no	no	no	no	no	no	no	no	no	no	yes	no	no	no	no	0	0	0	0	0	0	0	0	1	0	1	1	1	1	0
24276_2#191	Siriraj	NA	GCF_900495065.1	AB49	2016	Thailand	2	ERR2618905	ERS1930199	UFIW01000001-UFIW01000043	KL49	OCL1	no	no	no	no	no	no	no	no	no	yes	no	no	no	no	no	no	no	yes	no	no	no	no	0	0	0	0	0	0	0	0	1	0	1	1	0	1	0
24276_2#143	Siriraj	Pus	GCF_900494425.1	AB1	2016	Thailand	2	ERR2618857	ERS1930151	UFGQ01000001-UFGQ01000056	KL52	OCL1	no	no	no	yes	no	no	no	no	no	no	no	no	no	no	no	no	no	yes	no	no	no	no	0	0	0	0	0	0	0	0	1	0	1	1	1	1	0
24276_2#173	Siriraj	NA	GCF_900494995.1	AB31	2016	Thailand	2	ERR2618887	ERS1930181	UFIM01000001-UFIM01000046	KL52	OCL1	no	no	no	no	no	no	no	no	no	yes	no	no	no	no	no	no	no	yes	no	no	no	no	0	0	0	0	0	0	0	0	1	0	1	1	1	1	0
24276_2#175	Siriraj	NA	GCF_900494985.1	AB33	2016	Thailand	2	ERR2618889	ERS1930183	UFIP01000001-UFIP01000051	KL52	OCL1	no	no	no	yes	no	no	no	no	yes	yes	no	no	no	no	no	no	no	yes	no	no	no	no	0	0	0	0	1	0	0	0	1	0	1	1	1	1	0
24276_2#176	Siriraj	NA	GCF_900494915.1	AB34	2016	Thailand	2	ERR2618890	ERS1930184	UFIE01000001-UFIE01000051	KL52	OCL1	no	no	no	yes	no	no	no	no	yes	yes	no	no	no	no	no	no	no	yes	no	no	no	no	0	0	0	0	0	0	0	0	1	0	1	1	1	1	0
24276_2#181	Siriraj	NA	GCF_900494835.1	AB39	2016	Thailand	2	ERR2618895	ERS1930189	UFIA01000001-UFIA01000050	KL52	OCL1	no	no	no	no	no	no	no	no	no	yes	no	no	no	no	no	no	no	yes	no	no	no	no	0	0	0	0	0	0	0	0	1	0	1	1	1	1	0
24276_2#192	Siriraj	NA	GCF_900495125.1	AB50	2016	Thailand	2	ERR2618906	ERS1930200	UFJH01000001-UFJH01000048	KL52	OCL1	no	no	no	no	no	no	no	no	no	no	no	no	no	no	no	no	no	yes	no	no	no	no	0	0	0	0	0	1	0	0	1	0	1	1	1	1	0
24276_2#221	Siriraj	NA	GCF_900495425.1	AB79	2016	Thailand	2	ERR2618935	ERS1930229	UFKD01000001-UFKD01000069	KL52	OCL1	no	no	no	no	no	no	no	no	no	yes	no	no	no	no	no	no	no	yes	no	no	no	no	0	0	0	0	0	1	0	0	1	0	1	1	0	1	0
24276_2#254	TU	sputum	GCF_900495765.1	ABMYSP-444	2016	Thailand	2	ERR2618968	ERS1930262	UFLG01000001-UFLG01000064	KL52	OCL1	no	no	no	no	no	no	no	no	no	no	no	no	no	no	no	no	no	yes	no	no	no	no	0	0	0	0	0	1	0	0	1	0	1	1	1	1	0
24276_3#52	Songkla	NA	GCF_900496755.1	NPRC AB28	2016	Thailand	2	ERR2619072	ERS1930366	UFPI01000001-UFPI01000060	KL52	OCL1	no	no	no	yes	no	no	no	no	no	no	no	no	no	no	no	no	no	yes	no	no	no	no	0	1	0	0	0	0	0	0	0	0	1	1	0	1	0
24276_3#63	Songkla	NA	GCF_900496845.1	NPRC AB26	2016	Thailand	2	ERR2619083	ERS1930377	UFPN01000001-UFPN01000057	KL52	OCL1	no	no	no	yes	no	no	no	no	no	no	no	no	no	no	no	no	no	yes	no	no	no	no	0	1	0	0	0	0	0	0	0	0	1	1	1	1	0
24276_2#148	Siriraj	sputum	GCF_900494455.1	AB6	2016	Thailand	2	ERR2618862	ERS1930156	UFGN01000001-UFGN01000049	KL6	OCL1	no	no	no	yes	no	no	no	no	no	yes	no	no	no	no	no	no	no	yes	no	no	no	no	0	0	0	0	0	1	0	0	0	0	1	1	1	1	0
24276_2#149	Siriraj	sputum	GCF_900494465.1	AB7	2016	Thailand	2	ERR2618863	ERS1930157	UFGR01000001-UFGR01000061	KL6	OCL1	no	no	no	no	no	no	no	no	no	no	no	no	no	no	no	no	no	yes	no	no	no	no	0	0	0	0	0	1	0	0	1	0	1	1	1	1	0
24276_2#151	Siriraj	sputum	GCF_900494405.1	AB9	2016	Thailand	2	ERR2618865	ERS1930159	UFGK01000001-UFGK01000056	KL6	OCL1	no	no	no	no	no	no	no	no	no	yes	no	no	no	no	no	no	no	yes	no	no	no	no	0	0	0	0	0	1	0	0	1	0	1	1	1	1	0
24276_2#187	Siriraj	NA	GCF_900495055.1	AB45	2016	Thailand	2	ERR2618901	ERS1930195	UFIU01000001-UFIU01000060	KL6	OCL1	no	no	no	no	no	no	no	no	no	yes	no	no	no	no	no	no	no	yes	no	no	no	no	0	0	0	0	0	1	0	0	1	0	1	1	1	1	0
24276_2#188	Siriraj	NA	GCF_900495075.1	AB46	2016	Thailand	2	ERR2618902	ERS1930196	UFIX01000001-UFIX01000066	KL6	OCL1	no	no	no	no	no	no	no	no	no	yes	no	no	no	no	no	no	no	yes	no	no	no	no	0	0	0	0	0	1	0	0	1	0	1	1	1	1	0
24276_2#195	Siriraj	NA	GCF_900495115.1	AB53	2016	Thailand	2	ERR2618909	ERS1930203	UFJJ01000001-UFJJ01000073	KL6	OCL1	no	no	no	no	yes	no	no	no	no	yes	no	no	no	no	no	yes	no	yes	no	no	no	no	0	0	0	0	0	1	0	0	1	0	1	1	1	1	0
24276_2#197	Siriraj	NA	GCF_900495155.1	AB55	2016	Thailand	2	ERR2618911	ERS1930205	UFJE01000001-UFJE01000076	KL6	OCL1	no	no	no	no	no	no	no	no	no	yes	no	no	no	no	no	no	no	yes	no	no	no	no	0	0	0	0	0	1	0	0	1	0	1	1	1	1	0
24276_2#215	Siriraj	NA	GCF_900495275.1	AB73	2016	Thailand	2	ERR2618929	ERS1930223	UFJU01000001-UFJU01000064	KL6	OCL1	no	no	no	no	no	no	no	no	no	yes	no	no	no	no	no	no	no	yes	no	no	no	no	0	0	0	0	0	1	0	0	1	0	1	1	1	1	0
24276_2#222	Siriraj	NA	GCF_900495375.1	AB80	2016	Thailand	2	ERR2618936	ERS1930230	UFKP01000001-UFKP01000255	KL6	OCL1	no	no	no	no	no	no	no	no	no	yes	no	no	no	no	no	no	no	yes	no	no	yes	no	0	1	1	1	0	1	0	0	1	0	1	1	1	1	0
24276_2#242	Siriraj	NA	GCF_900495555.1	AB100	2016	Thailand	2	ERR2618956	ERS1930250	UFKU01000001-UFKU01000082	KL6	OCL1	no	no	no	no	no	no	no	no	no	yes	no	no	no	no	no	no	no	yes	no	no	yes	no	0	0	0	0	0	1	0	0	1	0	1	1	1	1	0
24276_2#248	TU	sputum	GCF_900495725.1	ABMYSP-185	2016	Thailand	2	ERR2618962	ERS1930256	UFLK01000001-UFLK01000058	KL6	OCL1	no	no	no	no	no	no	no	no	no	yes	no	no	no	no	no	no	no	yes	no	no	no	no	0	0	0	0	0	1	0	0	1	0	1	1	1	1	0
24276_2#249	TU	sputum	GCF_900495755.1	ABMYSP-216	2016	Thailand	2	ERR2618963	ERS1930257	UFLF01000001-UFLF01000061	KL6	OCL1	no	no	no	no	no	no	no	no	no	yes	no	no	no	no	no	no	no	yes	no	no	no	no	0	0	0	0	0	1	0	0	1	0	1	1	1	1	0
24276_2#252	TU	Blood	GCF_900495685.1	ABMYH-1652	2016	Thailand	2	ERR2618966	ERS1930260	UFLN01000001-UFLN01000057	KL6	OCL1	no	no	no	no	no	no	no	no	no	yes	no	no	no	no	no	no	no	yes	no	no	no	no	0	0	0	0	0	1	0	0	1	0	1	1	1	1	0
24276_2#255	TU	sputum	GCF_900495705.1	ABMYSP-475	2016	Thailand	2	ERR2618969	ERS1930263	UFLE01000001-UFLE01000064	KL6	OCL1	no	no	no	no	no	no	no	no	no	yes	no	no	no	no	no	no	no	yes	no	no	no	no	0	0	0	0	0	1	0	0	0	0	1	1	1	1	0
24276_2#256	TU	sputum	GCF_900495785.1	ABMYSP-477	2016	Thailand	2	ERR2618970	ERS1930264	UFLO01000001-UFLO01000074	KL6	OCL1	no	no	no	no	no	no	no	no	no	no	no	no	no	no	no	no	no	yes	no	no	no	no	0	0	0	0	0	1	0	0	1	0	1	1	0	1	0
24276_2#257	TU	sputum	GCF_900495775.1	ABMYSP-479	2016	Thailand	2	ERR2618971	ERS1930265	UFLM01000001-UFLM01000052	KL6	OCL1	no	no	no	no	no	no	no	no	no	no	no	no	no	no	no	no	no	yes	no	no	no	no	0	0	0	0	0	1	0	0	1	0	1	1	1	1	0
24276_2#259	TU	sputum	GCF_900495615.1	ABMYSP-517	2016	Thailand	2	ERR2618973	ERS1930267	UFLJ01000001-UFLJ01000050	KL6	OCL1	no	no	no	no	no	no	no	no	no	yes	no	no	no	no	no	no	no	yes	no	no	no	no	0	0	0	0	0	1	0	0	1	0	1	1	1	1	0
24276_2#266	TU	sputum	GCF_900495805.1	ABMASP-366	2016	Thailand	2	ERR2618980	ERS1930274	UFLP01000001-UFLP01000054	KL6	OCL1	no	no	no	no	no	no	no	no	no	no	no	no	no	no	no	no	no	yes	no	no	no	no	0	0	0	0	0	1	0	0	1	0	1	1	1	1	0
24276_2#268	TU	sputum	GCF_900495825.1	ABMASP-379	2016	Thailand	2	ERR2618982	ERS1930276	UFLQ01000001-UFLQ01000061	KL6	OCL1	no	no	no	no	no	no	no	no	no	yes	no	no	no	no	no	no	no	yes	no	no	no	no	0	0	0	0	1	1	0	0	1	0	1	1	1	1	0
24276_2#270	TU	sputum	GCF_900496005.1	ABMASP-491	2016	Thailand	2	ERR2618984	ERS1930278	UFMK01000001-UFMK01000066	KL6	OCL1	no	no	no	no	no	no	no	no	no	no	no	no	no	no	no	no	no	yes	no	no	no	no	0	0	0	0	0	1	0	0	1	0	1	1	1	1	0
24276_2#277	TU	sputum	GCF_900495875.1	ABAPSP-195	2016	Thailand	2	ERR2618991	ERS1930285	UFMA01000001-UFMA01000113	KL6	OCL1	no	no	no	yes	no	no	no	no	yes	no	no	no	no	no	no	no	no	yes	no	no	no	no	0	0	0	0	1	1	0	0	1	0	1	1	0	1	0
24276_2#280	TU	Urine	GCF_900495885.1	ABAPU-469	2016	Thailand	2	ERR2618994	ERS1930288	UFMC01000001-UFMC01000055	KL6	OCL1	no	no	no	no	no	no	no	no	no	yes	no	no	no	no	no	no	no	yes	no	no	no	no	0	0	0	0	0	1	0	0	1	0	1	1	0	1	0
24276_2#281	TU	Urine	GCF_900495855.1	ABAPU-722	2016	Thailand	2	ERR2618995	ERS1930289	UFMB01000001-UFMB01000052	KL6	OCL1	no	no	no	no	no	no	no	no	no	yes	no	no	no	no	no	no	no	yes	no	no	no	no	0	0	0	0	0	1	0	0	1	0	1	1	1	1	0
24276_2#282	TU	sputum	GCF_900495895.1	ABMYSP-494	2016	Thailand	2	ERR2618996	ERS1930290	UFLZ01000001-UFLZ01000059	KL6	OCL1	no	no	no	no	no	no	no	no	no	yes	no	no	no	no	no	no	no	yes	no	no	no	no	0	0	0	0	0	1	0	0	1	0	1	1	1	1	0
24276_2#284	TU	sputum	GCF_900495925.1	ABMYSP-6	2016	Thailand	2	ERR2618998	ERS1930292	UFMI01000001-UFMI01000074	KL6	OCL1	no	no	no	no	no	no	no	no	no	yes	no	no	no	no	no	no	no	yes	no	no	no	no	0	0	0	0	0	1	0	0	1	0	1	1	1	1	0
24276_2#298	TU	sputum	GCF_900496315.1	ABMYSP-210	2016	Thailand	2	ERR2619012	ERS1930306	UFNE01000001-UFNE01000084	KL6	OCL1	no	no	no	no	no	no	no	no	no	yes	no	no	no	no	no	no	no	yes	no	no	no	no	0	0	0	0	0	1	0	0	1	0	1	1	1	1	0
24276_2#302	TU	sputum	GCF_900496255.1	ABMYSP-245	2016	Thailand	2	ERR2619016	ERS1930310	UFNK01000001-UFNK01000063	KL6	OCL1	no	no	no	no	no	no	no	no	no	no	no	no	no	no	no	no	no	yes	no	no	no	no	0	0	0	0	0	1	0	0	1	0	1	1	1	1	0
24276_2#304	TU	Blood	GCF_900496345.1	ABMYH-1033	2016	Thailand	2	ERR2619018	ERS1930312	UFNC01000001-UFNC01000052	KL6	OCL1	no	no	no	no	no	no	no	no	yes	yes	no	no	no	no	no	no	no	yes	no	no	no	no	0	0	0	0	0	1	0	1	0	0	1	1	1	1	0
24276_2#230	Siriraj	NA	GCF_900495335.1	AB88	2016	Thailand	2	ERR2618944	ERS1930238	UFKM01000001-UFKM01000085	No confidence (KL125)	OCL1	no	no	no	no	no	no	no	no	no	no	no	no	no	no	no	no	no	yes	no	no	no	no	0	0	0	0	0	0	0	0	1	0	1	1	1	1	0
24276_2#299	TU	sputum	GCF_900496135.1	ABMYSP-213	2016	Thailand	2	ERR2619013	ERS1930307	UFMX01000001-UFMX01000032	KL24	OCL2	yes	no	no	no	no	no	no	no	no	no	no	no	no	no	no	no	no	no	no	no	no	no	0	0	0	0	0	0	0	0	0	0	0	0	0	1	0
24276_3#15	Songkla	Urine	GCF_900496395.1	AB1003-09	2016	Thailand	2	ERR2619035	ERS1930329	UFNX01000001-UFNX01000043	KL24	OCL2	no	no	no	yes	no	no	no	no	no	no	no	no	no	no	no	no	no	yes	no	no	no	no	0	0	0	0	0	0	0	0	0	0	1	1	1	1	0
24276_3#10	Songkla	sputum	GCF_900496175.1	AB5922	2016	Thailand	2	ERR2619030	ERS1930324	UFNP01000001-UFNP01000377	No confidence (KL30)	OCL3	no	no	no	yes	no	no	no	no	yes	no	no	no	no	yes	no	no	no	yes	no	no	no	no	0	0	1	1	1	1	0	0	1	0	1	1	1	0	0
24276_3#37	Songkla	sputum	GCF_900496535.1	AB4478-09	2016	Thailand	2	ERR2619057	ERS1930357	UFOT01000001-UFOT01000074	KL10	OCL5	no	no	no	yes	no	no	no	no	no	no	no	no	no	no	no	no	no	yes	no	no	no	no	0	0	0	0	0	0	0	0	0	0	1	1	1	1	0
24276_3#5	Songkla	sputum	GCF_900496195.1	AB3879	2016	Thailand	2	ERR2619025	ERS1930319	UISY01000001-UISY01000325	KL10	OCL5	no	no	no	no	no	no	no	no	no	no	no	no	no	no	no	no	no	yes	no	no	no	no	1	0	0	0	0	0	0	0	1	0	1	1	1	1	0
24276_3#53	Songkla	NA	GCF_900496705.1	NPRC AB7	2016	Thailand	2	ERR2619073	ERS1930367	UFPD01000001-UFPD01000060	KL10	OCL5	no	no	no	yes	no	no	no	no	no	no	no	no	no	no	no	no	no	yes	no	no	no	no	0	1	1	1	0	1	0	0	1	0	1	1	1	1	0
24276_3#64	Songkla	NA	GCF_900496935.1	NPRC AB30	2016	Thailand	2	ERR2619084	ERS1930378	UFPM01000001-UFPM01000064	KL10	OCL5	no	no	no	no	no	no	no	no	no	no	yes	no	no	no	no	no	no	yes	no	no	no	no	0	1	1	1	0	1	0	0	1	0	0	0	1	1	0
24276_2#294	TU	sputum	GCF_900496125.1	ABMYSP-195	2016	Thailand	2	ERR2619008	ERS1930302	UFMP01000001-UFMP01000069	KL47	OCL5	no	no	no	yes	no	no	no	no	yes	no	no	no	no	no	no	no	no	yes	no	no	no	no	0	0	0	0	1	0	0	0	0	0	0	0	1	1	1
24276_3#18	Songkla	sputum	GCF_900496405.1	AB1615-09	2016	Thailand	2	ERR2619038	ERS1930332	UFNT01000001-UFNT01000052	KL47	OCL5	no	no	no	yes	no	no	no	no	yes	no	no	no	no	no	no	no	no	no	no	no	no	no	0	0	0	0	1	0	0	0	0	0	0	0	1	1	1
24276_3#28	Songkla	sputum	GCF_900496505.1	AB2693-09	2016	Thailand	2	ERR2619048	ERS1930342	UFOE01000001-UFOE01000047	KL47	OCL5	no	no	no	yes	no	no	no	no	no	no	no	no	no	no	no	no	no	yes	no	no	no	no	0	0	0	0	0	0	0	0	0	0	0	0	1	1	1
24276_3#66	Songkla	NA	GCF_900496945.1	NPRC AB34	2016	Thailand	2	ERR2619086	ERS1930380	UFPU01000001-UFPU01000073	KL47	OCL5	no	no	no	yes	no	no	no	no	no	no	no	no	no	no	no	no	no	yes	no	no	no	no	0	0	1	1	0	1	0	0	1	0	1	1	1	1	0
24276_3#61	Songkla	NA	GCF_900496865.1	NPRC AB20	2016	Thailand	2	ERR2619081	ERS1930375	UFPW01000001-UFPW01000077	KL52	OCL5	no	no	no	no	no	no	no	no	no	no	no	no	no	no	no	no	no	yes	no	no	no	no	0	1	1	1	0	0	0	0	1	0	1	1	1	1	0
24276_2#305	TU	Blood	GCF_900496325.1	ABMYH-1051	2016	Thailand	2	ERR2619019	ERS1930313	UFNJ01000001-UFNJ01000071	KL14	OCL6	no	no	no	no	no	no	no	no	no	no	no	no	no	no	no	no	no	no	no	no	no	no	1	0	0	0	0	0	0	0	1	0	1	1	0	1	0
24276_3#22	Songkla	Urine	GCF_900496425.1	AB1869-09	2016	Thailand	2	ERR2619042	ERS1930336	UFNY01000001-UFNY01000045	KL24	OCL7	no	no	no	yes	no	no	no	no	no	no	no	no	no	no	no	no	no	yes	no	no	no	no	0	0	0	0	1	0	0	0	0	0	0	0	1	1	0
24276_3#30	Songkla	sputum	GCF_900496525.1	AB3165-09	2016	Thailand	2	ERR2619050	ERS1930350	UFOH01000001-UFOH01000059	KL24	OCL7	no	no	no	yes	no	no	no	no	no	no	no	no	no	no	no	no	no	yes	no	no	no	no	1	0	0	1	1	0	0	1	0	0	0	0	1	1	0
24276_2#239	Siriraj	NA	GCF_900495565.1	AB97	2016	Thailand	10	ERR2618953	ERS1930247	UFKS01000001-UFKS01000070	KL108	OCL2	no	yes	no	no	no	no	no	no	no	no	no	no	no	no	no	no	no	yes	no	no	yes	no	0	0	0	0	0	0	0	0	0	0	0	0	1	1	0
24276_2#161	Siriraj	NA	GCF_900494795.1	AB19	2016	Thailand	10	ERR2618875	ERS1930169	UFHV01000001-UFHV01000042	KL49	OCL2	no	no	no	yes	yes	no	no	no	no	no	no	no	no	no	yes	no	no	yes	no	no	no	no	0	0	0	0	0	0	0	0	0	0	0	1	1	1	1
24276_2#300	TU	Blood	GCF_900496285.1	ABMYH-797	2016	Thailand	16	ERR2619014	ERS1930308	UFMY01000001-UFMY01000059	KL10	OCL1	no	no	no	no	no	no	no	no	no	no	no	no	no	no	no	no	no	yes	no	no	no	no	0	0	0	0	0	1	0	0	1	0	1	1	1	1	0
24276_3#8	Songkla	Pus	GCF_900496185.1	AB4124	2016	Thailand	16	ERR2619028	ERS1930322	UFND01000001-UFND01000071	KL24	OCL2	no	no	no	yes	no	no	no	no	no	no	no	no	no	no	no	no	no	yes	no	no	no	no	0	0	0	0	0	0	0	0	0	0	1	1	1	1	0
24276_3#31	Songkla	sputum	GCF_900496615.1	AB3240-09	2016	Thailand	16	ERR2619051	ERS1930351	UFOS01000001-UFOS01000039	KL49	OCL2	no	no	no	yes	no	no	no	no	no	no	yes	no	no	yes	no	no	no	no	no	no	no	no	0	0	0	0	0	0	0	0	0	0	0	0	1	1	0
24276_3#16	Songkla	sputum	GCF_900496365.1	AB1243-09	2016	Thailand	16	ERR2619036	ERS1930330	UFNS01000001-UFNS01000148	No confidence (KL30)	OCL3	no	no	no	no	no	no	no	no	yes	no	no	no	no	yes	no	no	no	yes	no	no	no	no	0	0	1	1	1	1	0	0	1	0	0	0	1	0	0
24276_3#33	Songkla	Tissue	GCF_900496595.1	AB3933-09	2016	Thailand	16	ERR2619053	ERS1930353	UFOX01000001-UFOX01000086	KL10	OCL5	no	no	no	yes	no	no	no	no	no	no	yes	no	no	yes	no	no	no	yes	no	no	no	no	0	0	0	0	0	0	0	0	1	0	1	1	1	1	0
24276_3#12	Songkla	sputum	GCF_900496335.1	AB6054	2016	Thailand	16	ERR2619032	ERS1930326	UFNN01000001-UFNN01000113	KL47	OCL5	no	no	no	yes	no	no	no	no	yes	no	no	no	no	no	no	no	no	yes	no	no	no	no	0	0	0	0	1	0	0	0	0	0	0	0	1	1	1
24276_3#23	Songkla	Urine	GCF_900496435.1	AB1931-09	2016	Thailand	16	ERR2619043	ERS1930337	UFNZ01000001-UFNZ01000068	KL47	OCL5	no	no	no	yes	no	no	no	no	yes	no	no	no	no	yes	no	no	no	yes	no	no	no	no	0	0	0	0	1	0	0	0	0	0	0	0	1	1	1
24276_3#50	Songkla	NA	GCF_900496745.1	NPRC AB5	2016	Thailand	16	ERR2619070	ERS1930347	UFPC01000001-UFPC01000060	KL14	OCL6	no	no	no	no	no	no	no	no	no	no	yes	no	no	no	no	no	no	yes	no	no	yes	no	0	0	0	0	0	0	0	1	0	0	1	1	1	1	0
24276_2#168	Siriraj	NA	GCF_900494815.1	AB26	2016	Thailand	16	ERR2618882	ERS1930176	UFIK01000001-UFIK01000055	KL24	OCL7	no	no	no	no	no	no	no	no	no	no	no	no	no	yes	no	no	no	yes	no	no	no	no	0	0	0	0	0	0	0	1	0	0	0	0	1	1	0
24276_2#291	TU	sputum	GCF_900496075.1	ABMYSP-101	2016	Thailand	25	ERR2619005	ERS1930299	UFMU01000001-UFMU01000064	KL10	OCL1	no	no	no	no	no	no	no	no	no	no	no	no	no	no	no	no	no	yes	no	no	no	no	0	0	0	0	0	1	0	0	1	0	1	1	1	1	0
24276_3#51	Songkla	NA	GCF_900496695.1	NPRC AB24	2016	Thailand	25	ERR2619071	ERS1930348	UFPH01000001-UFPH01000068	KL52	OCL1	no	no	no	yes	no	no	no	no	no	no	yes	no	no	no	no	no	no	no	no	no	no	no	0	1	0	0	0	0	0	0	0	0	1	1	1	1	0
24276_2#306	TU	sputum	GCF_900496225.1	ABMYSP-419	2016	Thailand	25	ERR2619020	ERS1930314	UFNI01000001-UFNI01000055	KL6	OCL1	no	no	no	no	no	no	no	no	no	no	no	no	no	no	no	no	no	yes	no	no	no	no	0	0	0	0	0	1	0	0	1	0	1	1	1	1	0
24276_2#166	Siriraj	NA	GCF_900494975.1	AB24	2016	Thailand	25	ERR2618880	ERS1930174	UFIJ01000001-UFIJ01000024	KL116	OCL5	no	no	no	no	no	no	no	no	no	no	no	no	no	no	no	no	no	yes	no	no	no	no	0	0	0	0	0	0	0	0	0	0	0	0	1	1	0
24276_2#251	TU	Blood	GCF_900495735.1	ABMYH-1257	2016	Thailand	25	ERR2618965	ERS1930259	UFLI01000001-UFLI01000141	KL14	OCL6	no	no	no	no	no	no	no	no	no	no	no	no	no	no	no	no	no	yes	no	no	no	no	1	0	0	0	0	0	0	0	1	0	1	1	0	1	0
24276_2#267	TU	sputum	GCF_900495835.1	ABMASP-373	2016	Thailand	25	ERR2618981	ERS1930275	UFLW01000001-UFLW01000067	KL14	OCL6	no	no	no	no	no	no	no	no	no	no	no	no	no	no	no	no	no	no	no	no	no	no	1	0	0	0	0	0	0	0	1	0	1	1	0	1	0
24276_2#245	TU	Blood	GCF_900495635.1	ABAPH-350	2016	Thailand	32	ERR2618959	ERS1930253	UFLD01000001-UFLD01000149	KL7	OCL6	no	no	no	no	no	no	no	no	no	no	no	no	yes	yes	no	no	no	yes	no	no	no	no	0	0	0	0	0	0	0	0	0	0	1	1	1	0	0
24276_2#196	Siriraj	NA	GCF_900495205.1	AB54	2016	Thailand	52	ERR2618910	ERS1930204	UFJF01000001-UFJF01000016	KL57	OCL1	no	no	no	no	no	no	no	no	no	no	no	no	no	no	no	no	no	yes	no	no	no	no	0	0	0	0	0	0	0	0	0	0	0	0	0	1	0
24276_2#211	Siriraj	NA	GCF_900495295.1	AB69	2016	Thailand	103	ERR2618925	ERS1930219	UFJR01000001-UFJR01000027	KL24	OCL7	yes	no	no	no	no	no	no	no	no	no	no	no	no	yes	no	no	no	no	no	no	no	no	0	0	0	0	0	0	0	0	0	0	0	0	1	1	0
24276_3#21	Songkla	Urine	GCF_900496445.1	AB1719-09	2016	Thailand	108	ERR2619041	ERS1930335	UFOC01000001-UFOC01000062	KL49	OCL1	no	no	no	no	no	no	no	no	no	no	no	no	no	no	no	no	no	yes	no	no	no	no	0	0	0	0	0	1	0	0	1	0	1	1	1	1	0
24276_3#48	Songkla	NA	GCF_900496765.1	NPRC AB32	2016	Thailand	113	ERR2619068	ERS1930345	UFPE01000001-UFPE01000022	KL28	OCL1	no	no	no	no	no	no	no	no	no	yes	no	no	no	yes	no	no	no	no	no	no	no	no	0	0	0	0	0	0	0	0	0	0	0	0	0	1	0
24276_3#17	Songkla	sputum	GCF_900496355.1	AB1492-09	2016	Thailand	129	ERR2619037	ERS1930331	UFNV01000001-UFNV01000069	KL2	OCL1	no	no	no	yes	no	no	no	no	yes	no	no	no	no	no	no	no	no	yes	no	no	no	no	0	0	0	0	0	1	0	0	1	0	1	1	1	1	0
24276_3#3	Songkla	Blood	GCF_900496205.1	AB2792	2016	Thailand	129	ERR2619023	ERS1930317	UFNH01000001-UFNH01000085	KL49	OCL1	no	no	no	yes	no	no	no	no	yes	no	no	no	no	yes	no	no	no	yes	no	no	no	no	0	0	0	0	0	1	0	0	1	0	1	1	1	1	0
24276_2#180	Siriraj	NA	GCF_900494875.1	AB38	2016	Thailand	129	ERR2618894	ERS1930188	UFIN01000001-UFIN01000148	No confidence (KL30)	OCL3	no	no	no	no	no	no	no	no	yes	no	no	no	no	yes	no	no	no	yes	no	no	no	no	0	0	1	1	1	1	0	0	1	0	0	0	1	0	0
24276_3#39	Songkla	sputum	GCF_900496475.1	AB4893-09	2016	Thailand	129	ERR2619059	ERS1930359	UFOR01000001-UFOR01000124	No confidence (KL30)	OCL3	no	no	no	yes	no	no	no	no	yes	no	no	no	no	yes	no	no	no	yes	no	no	no	no	0	0	1	0	1	1	0	0	0	0	0	0	1	0	0
24276_3#9	Songkla	sputum	GCF_900496155.1	AB6081	2016	Thailand	129	ERR2619029	ERS1930323	UFNB01000001-UFNB01000134	No confidence (KL30)	OCL3	no	no	no	yes	no	no	no	no	yes	no	no	no	no	yes	no	no	no	yes	no	no	no	no	0	0	1	0	1	1	0	0	0	0	0	0	0	0	0
24276_3#11	Songkla	sputum	GCF_900496245.1	AB183	2016	Thailand	129	ERR2619031	ERS1930325	UFNO01000001-UFNO01000099	KL24	OCL7	no	no	no	yes	no	no	no	no	yes	no	yes	no	no	yes	no	no	no	yes	no	no	no	no	1	0	0	1	1	0	0	1	0	0	1	1	1	1	0
24276_3#13	Songkla	sputum	GCF_900496385.1	AB724	2016	Thailand	164	ERR2619033	ERS1930327	UFNR01000001-UFNR01000110	KL49	OCL1	no	no	no	yes	no	no	no	no	no	yes	no	no	no	no	no	no	no	yes	no	no	no	no	0	0	0	0	0	1	0	0	1	0	1	1	1	1	0
24276_2#297	TU	sputum	GCF_900496265.1	ABMYSP-207	2016	Thailand	164	ERR2619011	ERS1930305	UFNF01000001-UFNF01000059	KL6	OCL1	no	no	no	no	no	no	no	no	no	yes	no	no	no	no	no	no	no	yes	no	no	no	no	0	0	0	0	0	1	0	0	1	0	1	1	1	1	0
24276_3#19	Songkla	sputum	GCF_900496415.1	AB1623-09	2016	Thailand	164	ERR2619039	ERS1930333	UFOD01000001-UFOD01000028	KL49	OCL2	no	no	no	yes	no	no	no	no	no	yes	no	no	no	no	no	no	no	yes	no	no	no	no	0	0	0	0	0	0	0	0	0	0	0	0	1	1	0
24276_3#24	Songkla	sputum	GCF_900496465.1	AB1966-09	2016	Thailand	164	ERR2619044	ERS1930338	UFOB01000001-UFOB01000039	KL49	OCL2	no	no	no	yes	no	no	no	no	yes	no	no	no	no	no	no	no	no	no	no	no	no	no	0	0	0	0	1	0	0	0	0	0	0	0	1	1	0
24276_3#26	Songkla	sputum	GCF_900496665.1	AB2568-09	2016	Thailand	164	ERR2619046	ERS1930340	UFOV01000001-UFOV01000084	KL10	OCL5	no	no	no	yes	no	no	no	no	no	no	no	no	no	no	no	no	no	no	no	no	no	no	0	0	1	1	0	1	0	0	1	0	1	1	1	1	0
24276_3#29	Songkla	sputum	GCF_900496625.1	AB3025-09	2016	Thailand	164	ERR2619049	ERS1930349	UFOP01000001-UFOP01000109	KL10	OCL5	no	no	no	yes	no	no	no	no	no	no	no	no	no	no	no	no	no	yes	no	no	no	no	0	0	1	1	0	1	0	0	1	0	1	1	1	1	0
24276_2#172	Siriraj	NA	GCF_900494935.1	AB30	2016	Thailand	164	ERR2618886	ERS1930180	UFIQ01000001-UFIQ01000049	KL47	OCL5	no	no	no	yes	no	no	no	no	yes	no	no	no	no	no	no	no	no	no	no	no	no	no	0	0	0	0	1	0	0	0	0	0	0	0	1	1	1
24276_2#229	Siriraj	NA	GCF_900495495.1	AB87	2016	Thailand	164	ERR2618943	ERS1930237	UFKG01000001-UFKG01000089	KL47	OCL5	no	no	no	yes	no	no	no	no	yes	no	no	no	no	no	no	no	no	no	no	no	no	no	0	0	0	0	1	0	0	0	0	0	0	0	1	1	1
24276_2#263	TU	sputum	GCF_900495795.1	ABJNSP-17	2016	Thailand	164	ERR2618977	ERS1930271	UFLR01000001-UFLR01000075	KL47	OCL5	no	no	no	yes	no	no	no	no	yes	no	no	no	no	no	no	no	no	no	no	no	no	no	0	0	0	0	1	0	0	0	0	0	0	0	1	1	1
24276_2#264	TU	Blood	GCF_900495815.1	ABJNH-92	2016	Thailand	164	ERR2618978	ERS1930272	UFLU01000001-UFLU01000079	KL47	OCL5	no	no	no	yes	no	no	no	no	yes	no	no	no	no	no	no	no	no	no	no	no	no	no	0	0	0	0	1	0	0	0	0	0	0	0	1	1	1
24276_2#271	TU	sputum	GCF_900495985.1	ABAPSP-515	2016	Thailand	164	ERR2618985	ERS1930279	UFMD01000001-UFMD01000063	KL47	OCL5	no	no	no	yes	no	no	no	no	no	no	no	no	no	no	no	no	no	no	no	no	no	no	0	0	0	0	0	0	0	0	0	0	0	0	1	1	1
24276_2#273	TU	sputum	GCF_900495865.1	ABAPSP-523	2016	Thailand	164	ERR2618987	ERS1930281	UFMH01000001-UFMH01000058	KL47	OCL5	no	no	no	yes	no	no	no	no	no	no	no	no	no	no	no	no	no	no	no	no	no	no	0	0	0	0	0	0	0	0	0	0	0	0	1	1	1
24276_2#276	TU	Pus	GCF_900496015.1	ABAPP-93	2016	Thailand	164	ERR2618990	ERS1930284	UFMJ01000001-UFMJ01000082	KL47	OCL5	no	no	no	yes	no	no	no	no	yes	no	no	no	no	no	no	no	no	no	no	no	no	no	0	0	0	0	1	0	0	0	0	0	0	0	1	1	1
24276_3#6	Songkla	sputum	GCF_900496165.1	AB3893	2016	Thailand	164	ERR2619026	ERS1930320	UFNG01000001-UFNG01000108	KL47	OCL5	no	no	no	no	no	no	no	no	no	no	no	no	no	no	no	no	no	yes	no	no	no	no	0	0	0	0	0	0	0	0	0	0	0	0	1	1	1
24276_3#43	Songkla	NA	GCF_900496485.1	NPRC AB14	2016	Thailand	193	ERR2619063	ERS1930363	UFOF01000001-UFOF01000084	KL43	OCL5	no	no	no	no	no	no	no	no	no	no	yes	no	no	no	no	yes	no	no	no	no	no	no	0	0	0	0	0	0	0	0	0	0	0	0	1	0	0
24276_2#260	TU	Blood	GCF_900495645.1	ABMYH-1889	2016	Thailand	193	ERR2618974	ERS1930268	UFLH01000001-UFLH01000275	No confidence (KL111)	OCL6	no	no	no	no	no	no	no	no	yes	no	yes	no	no	no	no	no	no	yes	no	no	no	no	0	0	0	0	0	0	0	0	0	0	0	0	0	1	0
24276_2#217	Siriraj	NA	GCF_900495405.1	AB75	2016	Thailand	203	ERR2618931	ERS1930225	UFKC01000001-UFKC01000171	Low confidence (KL81)	OCL6	no	no	no	no	no	no	no	no	no	no	no	no	no	yes	no	no	no	no	yes	no	no	no	0	0	0	0	0	0	0	0	0	0	0	0	0	0	0
24276_3#2	Songkla	Pus	GCF_900496305.1	AB3396	2016	Thailand	215	ERR2619022	ERS1930316	UFMZ01000001-UFMZ01000054	KL2	OCL1	no	no	no	yes	no	no	no	no	no	no	no	no	no	no	no	no	no	no	no	no	yes	no	0	0	0	0	0	0	0	0	1	0	1	1	1	1	0
24276_3#36	Songkla	sputum	GCF_900496635.1	AB4452-09	2016	Thailand	215	ERR2619056	ERS1930356	UFOL01000001-UFOL01000052	KL2	OCL1	no	no	no	yes	no	no	no	no	no	no	no	no	no	no	no	no	no	no	no	no	yes	no	0	0	0	0	0	1	0	0	1	0	1	1	1	1	0
24276_3#60	Songkla	NA	GCF_900496915.1	NPRC AB19	2016	Thailand	215	ERR2619080	ERS1930374	UFPQ01000001-UFPQ01000049	KL2	OCL1	no	no	no	yes	no	no	no	no	no	no	no	no	no	no	no	no	no	yes	no	no	yes	no	0	0	0	0	0	1	0	0	1	0	1	1	1	1	0
24276_3#54	Songkla	NA	GCF_900496725.1	NPRC AB10	2016	Thailand	215	ERR2619074	ERS1930368	UFPA01000001-UFPA01000025	KL28	OCL1	no	no	no	yes	no	no	no	no	no	no	no	no	no	yes	no	no	no	no	no	no	yes	no	0	0	0	0	0	0	0	0	0	0	0	0	0	1	0
24276_3#62	Songkla	NA	GCF_900496835.1	NPRC AB22	2016	Thailand	215	ERR2619082	ERS1930376	UFPT01000001-UFPT01000052	KL3	OCL1	no	no	no	yes	no	no	no	no	no	no	no	no	no	yes	no	no	no	yes	no	no	yes	no	0	0	0	0	0	1	0	0	1	0	1	1	1	1	0
24276_3#65	Songkla	NA	GCF_900496905.1	NPRC AB33	2016	Thailand	215	ERR2619085	ERS1930379	UFPO01000001-UFPO01000058	KL3	OCL1	no	no	no	no	no	no	no	no	no	no	no	no	no	no	no	no	no	no	no	no	yes	no	0	0	0	0	0	1	0	0	1	0	1	1	0	1	0
24276_3#67	Songkla	NA	GCF_900496955.1	NPRC AB36	2016	Thailand	215	ERR2619087	ERS1930381	UFPS01000001-UFPS01000064	KL52	OCL1	no	no	no	no	no	no	no	no	no	no	no	no	no	yes	no	no	no	yes	no	no	yes	no	0	1	0	0	0	0	0	0	0	0	1	1	1	1	0
24276_3#27	Songkla	sputum	GCF_900496565.1	AB2682-09	2016	Thailand	215	ERR2619047	ERS1930341	UFOW01000001-UFOW01000054	No confidence (KL93)	OCL1	no	no	no	no	no	no	no	no	no	no	no	no	no	no	no	no	no	yes	no	no	yes	no	0	0	0	0	0	0	0	0	1	0	1	1	1	1	0
24276_3#38	Songkla	sputum	GCF_900496605.1	AB4545-09	2016	Thailand	215	ERR2619058	ERS1930358	UFOU01000001-UFOU01000146	No confidence (KL30)	OCL3	no	no	no	no	no	no	no	no	no	no	no	no	no	no	no	no	no	yes	no	no	yes	no	0	0	1	1	1	1	0	0	1	0	0	0	1	0	0
24276_2#158	Siriraj	NA	GCF_900494645.1	AB16	2016	Thailand	215	ERR2618872	ERS1930166	UFHF01000001-UFHF01000069	KL10	OCL5	no	no	no	no	no	no	no	no	no	no	no	no	no	no	no	no	no	yes	no	no	yes	no	0	0	1	1	0	1	0	0	1	0	1	1	1	1	0
24276_3#34	Songkla	Pus	GCF_900496645.1	AB4127-09	2016	Thailand	215	ERR2619054	ERS1930354	UFOK01000001-UFOK01000078	KL10	OCL5	no	no	no	yes	no	no	no	no	no	no	no	no	no	no	no	no	no	no	no	no	yes	no	0	0	1	1	0	1	0	0	1	0	1	1	1	1	0
24276_2#219	Siriraj	NA	GCF_900495445.1	AB77	2016	Thailand	215	ERR2618933	ERS1930227	UFKI01000001-UFKI01000088	KL128	OCL5	no	no	no	no	no	no	no	no	no	no	no	no	no	yes	no	no	no	no	no	no	yes	no	0	1	1	0	0	1	0	0	0	0	1	1	0	1	0
24276_2#240	Siriraj	NA	GCF_900495575.1	AB98	2016	Thailand	215	ERR2618954	ERS1930248	UFKW01000001-UFKW01000296	KL47	OCL5	no	no	no	no	no	no	no	no	no	yes	no	no	no	yes	no	no	no	yes	no	no	yes	no	0	0	1	1	0	1	0	0	1	0	1	1	1	1	0
24276_3#20	Songkla	sputum	GCF_900496455.1	AB1665-09	2016	Thailand	374	ERR2619040	ERS1930334	UFOA01000001-UFOA01000020	KL52	OCL1	no	no	no	yes	no	no	no	no	no	no	no	no	no	no	no	no	no	yes	no	no	no	no	0	0	0	0	0	0	0	0	0	0	1	1	1	1	0
24276_2#237	Siriraj	NA	GCF_900495355.1	AB95	2016	Thailand	374	ERR2618951	ERS1930245	UFJZ01000001-UFJZ01000035	KL3	OCL2	no	no	no	no	yes	no	no	no	no	no	no	no	no	no	no	no	no	yes	no	no	no	yes	0	0	0	0	0	0	0	0	0	0	0	0	1	1	0
24276_3#25	Songkla	sputum	GCF_900496495.1	AB2069-09	2016	Thailand	374	ERR2619045	ERS1930339	UFON01000001-UFON01000088	KL47	OCL5	no	no	no	yes	no	no	no	no	yes	yes	no	no	no	no	no	no	no	yes	no	no	no	no	0	0	0	0	0	0	0	0	0	0	0	0	1	1	1
24276_3#32	Songkla	Tissue	GCF_900496545.1	AB3905-09	2016	Thailand	374	ERR2619052	ERS1930352	UFOI01000001-UFOI01000071	KL24	OCL7	no	no	no	yes	no	no	no	no	no	yes	no	no	no	no	no	no	no	yes	no	no	no	no	1	0	0	1	1	0	0	1	0	0	0	0	1	1	0
24276_2#174	Siriraj	NA	GCF_900494955.1	AB32	2016	Thailand	578	ERR2618888	ERS1930182	UFIO01000001-UFIO01000214	KL2	OCL1	no	no	no	yes	no	no	no	no	yes	no	yes	no	no	no	no	no	no	yes	no	no	no	no	1	0	0	1	1	0	0	1	0	0	0	0	1	1	1
24276_2#289	TU	sputum	GCF_900496095.1	ABMYSP-30	2016	Thailand	578	ERR2619003	ERS1930297	UFMS01000001-UFMS01000109	KL14	OCL6	no	no	no	no	no	no	no	no	no	no	no	no	no	no	no	no	no	yes	no	no	no	no	1	0	0	0	0	0	0	0	1	0	1	1	0	1	0
24276_2#236	Siriraj	NA	GCF_900495415.1	AB94	2016	Thailand	653	ERR2618950	ERS1930244	UFKB01000001-UFKB01000118	No confidence (KL24)	OCL7	no	no	no	no	no	no	no	no	no	no	no	no	yes	no	no	yes	no	yes	no	no	no	no	0	0	0	0	0	0	0	0	0	0	0	0	0	0	0
24276_2#208	Siriraj	NA	GCF_900495225.1	AB66	2016	Thailand	823	ERR2618922	ERS1930216	UFJO01000001-UFJO01000052	KL49	OCL1	no	no	no	no	no	no	no	no	no	no	no	no	no	no	no	no	no	yes	no	no	no	no	0	0	0	0	0	1	0	0	1	0	1	1	1	1	0
24276_2#232	Siriraj	NA	GCF_900495345.1	AB90	2016	Thailand	866	ERR2618946	ERS1930240	UFKQ01000001-UFKQ01000024	KL9	OCL2	no	no	no	no	no	no	no	no	no	no	no	no	no	no	no	no	no	no	no	no	no	no	0	0	0	0	0	0	0	0	0	0	0	0	1	1	0
24276_2#283	TU	sputum	GCF_900495975.1	ABMYSP-500	2016	Thailand	939	ERR2618997	ERS1930291	UFMF01000001-UFMF01000035	No confidence (KL91)	OCL4	no	no	no	no	no	no	no	no	no	no	no	no	no	no	no	no	no	no	no	no	no	no	0	0	0	0	0	0	0	0	0	0	0	0	0	1	0
24276_2#244	TU	sputum	GCF_900495605.1	ABAPSP-114	2016	Thailand	1057	ERR2618958	ERS1930252	UFKV01000001-UFKV01000034	No confidence (KL25)	OCL3	no	no	no	no	yes	no	no	no	no	no	no	no	no	no	no	no	no	no	no	no	no	no	0	0	0	0	0	0	0	0	0	0	0	0	0	1	0
24276_2#225	Siriraj	NA	GCF_900495385.1	AB83	2016	Thailand	1153	ERR2618939	ERS1930233	UFJY01000001-UFJY01000047	KL8	OCL2	no	no	no	no	yes	no	no	no	no	no	no	no	no	no	no	no	no	yes	no	no	no	no	0	0	0	0	0	0	0	0	0	0	0	0	1	1	0
24276_3#49	Songkla	NA	GCF_900496735.1	NPRC AB3	2016	Thailand	incomplete	ERR2619069	ERS1930346	UFPF01000001-UFPF01000028	KL28	OCL1	no	no	no	yes	no	no	no	no	no	no	no	no	no	no	no	no	no	yes	no	no	no	no	0	0	0	0	0	0	0	0	0	0	0	0	0	1	0
24276_2#144	Siriraj	sputum	GCF_900494435.1	AB2	2016	Thailand	1430	ERR2618858	ERS1930152	UFGP01000001-UFGP01000017	KL32	OCL1	no	no	no	yes	no	no	no	no	no	yes	no	no	no	no	no	no	no	yes	no	no	no	no	0	0	0	0	0	0	0	0	1	0	0	0	1	1	0
24276_2#146	Siriraj	sputum	GCF_900494475.1	AB4	2016	Thailand	1430	ERR2618860	ERS1930154	UFGO01000001-UFGO01000018	KL32	OCL1	no	no	no	no	no	no	no	no	no	no	no	no	no	no	no	no	no	yes	no	no	no	no	0	0	0	0	0	0	0	0	0	0	0	0	1	1	0
24276_2#152	Siriraj	sputum	GCF_900494705.1	AB10	2016	Thailand	1430	ERR2618866	ERS1930160	UFHK01000001-UFHK01000014	KL32	OCL1	no	no	no	no	no	no	no	no	no	no	no	no	no	no	no	no	no	yes	no	no	no	no	0	0	0	0	0	0	0	0	0	0	0	0	1	1	0
24276_3#55	Songkla	NA	GCF_900496775.1	NPRC AB11	2016	Thailand	2	ERR2619075	ERS1930369	UFPG01000001-UFPG01000058	KL52	OCL1	no	no	no	no	no	no	no	no	no	no	no	no	no	no	no	no	no	yes	no	no	no	no	0	1	0	0	0	0	0	0	0	0	1	1	1	1	0
24276_2#209	Siriraj	NA	GCF_900495235.1	AB67	2016	Thailand	1431	ERR2618923	ERS1930217	UFJP01000001-UFJP01000129	KL19	OCL2	no	no	no	no	no	no	no	no	no	no	no	no	no	no	no	no	no	yes	no	no	no	yes	0	0	0	0	0	0	0	0	1	0	1	1	0	1	0
24276_2#190	Siriraj	NA	GCF_900495045.1	AB48	2016	Thailand	1356	ERR2618904	ERS1930198	UFIR01000001-UFIR01000016	KL63	OCL2	no	no	no	no	yes	no	no	no	no	no	no	no	no	no	no	no	no	yes	no	no	no	no	0	0	0	0	0	0	0	0	0	0	0	0	1	1	0
24276_2#182	Siriraj	NA	GCF_900494865.1	AB40	2016	Thailand	incomplete	ERR2618896	ERS1930190	UFIH01000001-UFIH01000056	KL113	OCL3	no	no	no	no	no	no	no	no	no	yes	no	no	no	yes	no	no	no	yes	no	no	no	no	0	0	0	0	0	0	0	0	1	0	1	1	1	1	0
24276_2#163	Siriraj	NA	GCF_900494775.1	AB21	2016	Thailand	1432	ERR2618877	ERS1930171	UFHU01000001-UFHU01000018	No confidence (KL53)	OCL4	no	no	no	no	no	no	no	no	no	no	no	no	no	no	no	no	no	no	no	no	no	no	0	0	0	0	0	0	0	0	0	0	0	0	1	1	0
24276_2#170	Siriraj	NA	GCF_900495005.1	AB28	2016	Thailand	1432	ERR2618884	ERS1930178	UFIG01000001-UFIG01000018	No confidence (KL53)	OCL4	no	no	no	no	no	no	no	no	no	no	no	no	no	no	no	no	no	yes	no	no	no	no	0	0	0	0	0	0	0	0	0	0	0	0	1	1	0
24276_3#42	Songkla	NA	GCF_900496555.1	NPRC AB4	2016	Thailand	193	ERR2619062	ERS1930362	UFOO01000001-UFOO01000115	KL48	OCL5	no	no	no	yes	no	no	no	no	no	no	no	no	no	no	no	no	no	no	no	no	no	no	0	0	0	0	0	0	0	0	0	0	0	0	0	1	0
24276_2#218	Siriraj	NA	GCF_900495545.1	AB76	2016	Thailand	1433	ERR2618932	ERS1930226	UFKN01000001-UFKN01000090	KL14	OCL6	no	no	no	no	no	no	no	no	no	no	no	no	no	no	no	yes	no	no	no	no	no	no	0	0	0	0	0	0	0	0	0	0	0	0	0	0	0
24276_2#210	Siriraj	NA	GCF_900495315.1	AB68	2016	Thailand	incomplete	ERR2618924	ERS1930218	UFJT01000001-UFJT01000030	KL24	OCL7	no	no	no	no	no	no	no	no	no	no	no	no	no	no	no	no	no	yes	no	no	no	yes	0	0	0	0	0	0	0	0	0	0	1	0	1	1	0
24276_3#4	Songkla	sputum	GCF_900496295.1	AB3876	2016	Thailand	16	ERR2619024	ERS1930318	UFNM01000001-UFNM01000274	KL24	OCL7	no	no	no	yes	no	no	no	no	no	no	no	no	no	no	no	no	no	no	no	no	no	no	1	0	0	1	1	0	0	1	0	0	0	0	1	1	0
24276_2#189	Siriraj	NA	GCF_900495025.1	AB47	2016	Thailand	1430	ERR2618903	ERS1930197	UFIT01000001-UFIT01000111	KL60	OCL7	no	no	no	no	yes	no	no	no	no	no	yes	no	no	no	no	no	no	yes	no	no	no	no	0	0	0	0	0	0	0	0	0	0	0	0	0	1	0
[truncated: 35 more columns]

## Sheet: Table S6
Strain ID	Hospital	KL	OCL	ST	Sample source	Motility (mm)		C' Susceptibilityb
						Swarmingc	Twitchingd		Ata	BfmR	BfmS	CsuA	CsuB	EntA	EnvZ	GspD	GspE	LipA	LtrA	NfuA	OAG	OmpR	PbpG	SurA1	ZnuC	pilA
ABMYSP-109	Thamma	KL10	OCL1c	2	Sputum	10	15	R	conserved	conserved	conserved	conserved	conserved	conserved	conserved	conserved	conserved	conserved	conserved	conserved	conserved	conserved	conserved	conserved	conserved	conserved
ABMYH-1245	Thamm	KL10	OCL1c	2	Blood	10	10	R	conserved	conserved	conserved	conserved	conserved	conserved	conserved	conserved	conserved	conserved	conserved	conserved	conserved	conserved	conserved	conserved	conserved	conserved
ABAPSP-55	Thamm	KL10	OCL1c	2	Sputum	10	5	R	conserved	conserved	conserved	conserved	conserved	conserved	conserved	conserved	conserved	conserved	conserved	conserved	conserved	conserved	conserved	conserved	conserved	conserved
ABAPSP-64	Thamm	KL10	OCL1c	2	Sputum	12	12	R	conserved	conserved	conserved	conserved	conserved	conserved	conserved	conserved	conserved	conserved	conserved	conserved	conserved	conserved	conserved	conserved	conserved	conserved
ABMYSP-101	Thamm	KL10	OCL1c	2	Sputum	10	5	R	conserved	conserved	conserved	conserved	conserved	conserved	conserved	conserved	conserved	conserved	conserved	conserved	conserved	conserved	conserved	conserved	conserved	conserved
ABMYSP-182	Thamm	KL10	OCL1c	2	Sputum	14	<5	R	conserved	conserved	conserved	conserved	conserved	conserved	conserved	conserved	conserved	conserved	conserved	conserved	conserved	conserved	conserved	conserved	conserved	conserved
ABMYSP-187	Thamm	KL10	OCL1c	2	Sputum	14	<5	R	conserved	conserved	conserved	conserved	conserved	conserved	conserved	conserved	conserved	conserved	conserved	conserved	conserved	conserved	conserved	conserved	conserved	conserved
ABMYH-797	Thamm	KL10	OCL1c	2	Blood	10	10	R	conserved	conserved	conserved	conserved	conserved	conserved	conserved	conserved	conserved	conserved	conserved	conserved	conserved	conserved	conserved	conserved	conserved	conserved
AB1039	Songkla	KL2	OCL1c	2	Sputum	19	<5	S	conserved	conserved	conserved	conserved	conserved	conserved	conserved	conserved	conserved	conserved	conserved	conserved	conserved	conserved	conserved	conserved	conserved	conserved
AB1492-09	Songkla	KL2	OCL1c	2	Sputum	16	<5	R	conserved	conserved	conserved	conserved	conserved	conserved	conserved	conserved	conserved	conserved	conserved	conserved	conserved	conserved	conserved	conserved	conserved	conserved
AB3396	Songkla	KL2	OCL1c	2	Tissue	15	<5	R	conserved	conserved	conserved	conserved	conserved	conserved	conserved	conserved	conserved	conserved	conserved	conserved	conserved	conserved	conserved	conserved	conserved	conserved
AB4452-09	Songkla	KL2	OCL1c	2	Sputum	10	<5	DS	conserved	conserved	conserved	conserved	conserved	conserved	conserved	conserved	conserved	conserved	conserved	conserved	conserved	conserved	conserved	conserved	conserved	conserved
AB11	Siriraj	KL3	OCL1c	2	Sputum	10	<5	R	conserved	conserved	conserved	conserved	conserved	conserved	conserved	conserved	conserved	conserved	conserved	conserved	conserved	conserved	conserved	conserved	conserved	conserved
ABJNH-403	Thamm	KL3	OCL1d	2	Blood	10	10	R	conserved	conserved	conserved	conserved	conserved	conserved	conserved	conserved	conserved	conserved	conserved	conserved	conserved	conserved	conserved	conserved	conserved	conserved
AB15	Siriraj	KL47	OCL1c	2	Sputum	15	5	R	conserved	conserved	conserved	conserved	conserved	conserved	conserved	conserved	conserved	conserved	conserved	conserved	conserved	conserved	conserved	conserved	conserved	conserved
ABAPP-61	Thamm	KL47	OCL1c	2	Tissue	15	<5	R	conserved	conserved	conserved	conserved	conserved	conserved	conserved	conserved	conserved	conserved	conserved	conserved	conserved	conserved	conserved	conserved	conserved	conserved
AB8	Siriraj	KL49	OCL1c	2	Sputum	15	<5	R	conserved	conserved	conserved	conserved	conserved	conserved	conserved	conserved	conserved	conserved	conserved	conserved	conserved	conserved	conserved	conserved	conserved	conserved
AB14	Siriraj	KL49	OCL1c	2	Sputum	17	<5	R	conserved	conserved	conserved	conserved	conserved	conserved	conserved	conserved	conserved	conserved	conserved	conserved	conserved	conserved	conserved	conserved	conserved	conserved
AB724	Songkla	KL49	OCL1c	2	Sputum	14	<5	R	conserved	conserved	conserved	conserved	conserved	conserved	conserved	conserved	conserved	conserved	frameshift	conserved	conserved	conserved	conserved	conserved	conserved	conserved
AB1719-09	Songkla	KL49	OCL1c	2	Tissue	15	<5	R	conserved	conserved	conserved	conserved	conserved	conserved	conserved	conserved	conserved	conserved	frameshift	conserved	conserved	conserved	conserved	conserved	conserved	conserved
AB2792	Songkla	KL49	OCL1c	2	Blood	10	10	R	conserved	conserved	conserved	conserved	conserved	conserved	conserved	conserved	conserved	conserved	frameshift	conserved	conserved	conserved	conserved	conserved	conserved	conserved
AB1	Siriraj	KL52	OCL1c	2	Tissue	14	<5	R	conserved	conserved	conserved	conserved	conserved	conserved	conserved	conserved	conserved	conserved	conserved	conserved	conserved	conserved	conserved	conserved	conserved	conserved
ABMYSP-444	Thamm	KL52	OCL1c	2	Sputum	10	5	R	conserved	conserved	conserved	conserved	conserved	conserved	conserved	conserved	conserved	conserved	conserved	conserved	conserved	conserved	conserved	conserved	conserved	conserved
AB6	Siriraj	KL6	OCL1c	2	Sputum	18	<5	R	conserved	conserved	conserved	conserved	conserved	conserved	conserved	conserved	conserved	conserved	conserved	conserved	conserved	conserved	conserved	conserved	conserved	conserved
AB7	Siriraj	KL6	OCL1c	2	Sputum	17	<5	R	conserved	conserved	conserved	conserved	conserved	conserved	conserved	conserved	conserved	conserved	conserved	conserved	conserved	conserved	conserved	conserved	conserved	conserved
AB9	Siriraj	KL6	OCL1c	2	Sputum	18	5	S	conserved	conserved	conserved	conserved	conserved	conserved	conserved	conserved	conserved	conserved	conserved	conserved	conserved	conserved	conserved	conserved	conserved	conserved
ABMYSP-185	Thamm	KL6	OCL1d	2	Sputum	10	5	R	conserved	conserved	conserved	conserved	conserved	conserved	conserved	conserved	conserved	conserved	conserved	conserved	conserved	conserved	conserved	conserved	conserved	conserved
ABMYSP-216	Thamm	KL6	OCL1c	2	Sputum	16	<5	R	conserved	conserved	conserved	conserved	conserved	conserved	conserved	conserved	conserved	conserved	conserved	conserved	conserved	conserved	conserved	conserved	conserved	conserved
ABMYH-1652	Thamm	KL6	OCL1c	2	Blood	10	5	R	conserved	conserved	conserved	conserved	conserved	conserved	conserved	conserved	conserved	conserved	conserved	conserved	conserved	conserved	conserved	conserved	conserved	conserved
ABMYSP-475	Thamm	KL6	OCL1c	2	Sputum	18	<5	R	conserved	conserved	conserved	absent	absent	conserved	conserved	conserved	conserved	conserved	conserved	conserved	conserved	conserved	conserved	conserved	conserved	conserved
ABMYSP-477	Thamm	KL6	OCL1c	2	Sputum	15	<5	R	conserved	conserved	conserved	conserved	conserved	conserved	conserved	conserved	conserved	conserved	conserved	conserved	conserved	conserved	conserved	conserved	conserved	conserved
ABMYSP-479	Thamm	KL6	OCL1c	2	Sputum	15	<5	R	conserved	conserved	conserved	conserved	conserved	conserved	conserved	conserved	conserved	conserved	conserved	conserved	conserved	conserved	conserved	conserved	conserved	conserved
ABMYSP-517	Thamm	KL6	OCL1c	2	Sputum	10	<5	R	conserved	conserved	conserved	conserved	conserved	conserved	conserved	conserved	conserved	conserved	conserved	conserved	conserved	conserved	conserved	conserved	conserved	conserved
ABMASP-366	Thamm	KL6	OCL1d	2	Sputum	10	5	R	conserved	conserved	conserved	conserved	conserved	conserved	conserved	conserved	conserved	conserved	conserved	conserved	conserved	conserved	conserved	conserved	conserved	conserved
ABMASP-379	Thamm	KL6	OCL1d	2	Sputum	10	13	R	conserved	conserved	conserved	conserved	conserved	conserved	conserved	conserved	conserved	conserved	conserved	conserved	conserved	conserved	conserved	conserved	conserved	conserved
ABMASP-491	Thamm	KL6	OCL1c	2	Sputum	10	<5	R	conserved	conserved	conserved	conserved	conserved	conserved	conserved	conserved	conserved	conserved	conserved	conserved	conserved	conserved	conserved	conserved	conserved	conserved
ABAPSP-195	Thamm	KL6	OCL1d	2	Sputum	10	<5	R	conserved	conserved	conserved	conserved	conserved	conserved	conserved	conserved	conserved	conserved	conserved	conserved	conserved	conserved	conserved	conserved	conserved	conserved
ABAPU-469	Thamm	KL6	OCL1c	2	Tissue	11	<5	R	conserved	conserved	conserved	conserved	conserved	conserved	conserved	conserved	conserved	conserved	conserved	conserved	conserved	conserved	conserved	conserved	conserved	conserved
ABAPU-722	Thamm	KL6	OCL1c	2	Tissue	16	<5	R	conserved	conserved	conserved	conserved	conserved	conserved	conserved	conserved	conserved	conserved	conserved	conserved	conserved	conserved	conserved	conserved	conserved	conserved
ABMYSP-494	Thamm	KL6	OCL1c	2	Sputum	16	<5	R	conserved	conserved	conserved	conserved	conserved	conserved	conserved	conserved	conserved	conserved	conserved	conserved	conserved	conserved	conserved	conserved	conserved	conserved
ABMYSP-6	Thamm	KL6	OCL1c	2	Sputum	16	<5	S	conserved	conserved	conserved	conserved	conserved	conserved	conserved	conserved	conserved	conserved	conserved	conserved	conserved	conserved	conserved	conserved	conserved	conserved
ABMYSP-207	Thamm	KL6	OCL1c	2	Sputum	10	<5	R	conserved	conserved	conserved	conserved	conserved	conserved	conserved	conserved	conserved	conserved	conserved	conserved	conserved	conserved	conserved	conserved	conserved	conserved
ABMYSP-210	Thamm	KL6	OCL1c	2	Sputum	10	<5	S	conserved	conserved	conserved	conserved	conserved	conserved	conserved	conserved	conserved	conserved	conserved	conserved	conserved	conserved	conserved	conserved	conserved	conserved
ABMYSP-245	Thamm	KL6	OCL1c	2	Sputum	10	<5	R	conserved	conserved	conserved	conserved	conserved	conserved	conserved	conserved	conserved	conserved	conserved	conserved	conserved	conserved	conserved	conserved	conserved	conserved
ABMYH-1033	Thamm	KL6	OCL1c	2	Blood	10	10	R	conserved	conserved	conserved	conserved	conserved	conserved	conserved	conserved	conserved	conserved	conserved	conserved	conserved	conserved	conserved	conserved	conserved	conserved

## Sheet: TableS3
	%Survival
Time (min)	ABJNH-109	ABMYH-1245	ABAPSP-55	ABAPSP-64	ABMYSP-101	ABMYSP-182	ABMYSP-187	ABMYSP-797	AB1039	AB1492-09	AB3396	AB4452-09	AB11	ABJNH-403	AB15	ABAPP-61	AB8	AB14	AB724	AB1719-09	AB2792	AB1	ABAPSP-444	AB6	AB7	AB9	ABAPSP-185	ABAPSP-216	ABMYH-1652	ABAPSP-475	ABMYSP-477	ABMYSP-479	ABMYSP-517	ABMASP-366	ABAPSP-379	ABMASP-491	ABAPSP-195	ABAPU-469	ABAPU-722	ABMYSP-494	ABMYSP-6	ABMYSP-207	ABMYSP-210	ABMYSP-245	ABMYH-1033	ABMYSP-419
0	100	100	100	100	100	100	100	100	100	100	100	100	100	100	100	100	100	100	100	100	100	100	100	100	100	100	100	100	100	100	100	100	100	100	100	100	100	100	100	100	100	100	100	100	100	100
30	80	95.2381	89.6296	155.556	155.833	72.2222	129.545	163.077	86.6667	53.75	96.2963	23.433	150.952	191.162	153.758	88.7542	112.222	73.8889	120.833	216.667	131.111	117.11	104.41	86.1472	84.2593	4.70209	77.6087	73.3333	105.556	95.8333	129.437	68.1481	166.667	130.556	41.6667	84.6296	126.389	112.381	106.071	84.4444	22.9167	127.579	25.8929	116.667	103.518	75.9091
60	60	131.991	98.2011	255.556	185	69.4444	136.375	177.692	0.01	29.9242	133.333	0.997568	162.619	189.52	135.621	78.165	121.111	90.2778	195.833	233.333	243.704	155.26	128.1	54.0404	26.1111	1.30515	75.5072	106.667	109.368	55.6818	111.255	46.6667	209.722	87.3232	75	120.556	143.889	88.0159	142.619	82.2222	5.20833	152.083	1.72619	107.54	577.238	73.2955
120	250	106.364	90.7937	355.556	181.667	77.7778	127.34	176.923	0.01	35.7576	138.889	0.00104345	203.571	972.222	215.196	47.8114	131.111	109.444	233.333	400	270.37	150.26	140.03	32.1068	17.7779	1.13849	95.6522	91.6667	100	81.1869	118.961	64.4444	309.722	101.717	91.6667	136.481	115.556	114.365	146.786	74.4444	6.25	139.683	0.833571	160.714	944.04	120.53
180	300	94.5887	77.4603	366.667	175	100	899.51	242.051	0.01	43.0682	111.111	0.00104345	213.571	1313.13	200.98	46.633	451.667	190.556	304.167	650	344.444	82.46	141.99	32.1068	14.0742	0	108.116	108.333	103.486	121.338	126.407	128.148	158.333	112.273	125	104.259	100.278	119.206	86.9048	70	5.5	168.254	0.20878	317.063	1253.62	125.758
ABJNH-109										ABMYH-1245
0 m	10^-3	10^-4	10^-5	10^-6	Choose	SD	%Survival	AVERAGE		0 m	10^-3	10^-4	10^-5	10^-6	Choose	SD	%Survival	AVERAGE
1st	>	>	10	2	100000000	0	100			1st				10	1000000000		100
2nd	>	>	10	3	100000000		100			2nd				11	1100000000		100
3rd	>	>	10	1	100000000		100	100		3rd		14		14	1400000000	2.08167e+08	100	100
30 m	10^-3	10^-4	10^-5	10^-6						30 m	10^-3	10^-4	10^-5	10^-6
1st	>	>	8	1	80000000	0	80			1st			20	10	1000000000		100
2nd	>	>	8	1	80000000		80			2nd			21	11	1100000000		100
3rd	>	>	8	1	80000000		80	80		3rd			22	12	1200000000	100000000	85.7143	95.2381
60 m	10^-3	10^-4	10^-5	10^-6						60 m	10^-3	10^-4	10^-5	10^-6
1st	>	>	4	1	40000000	1.73205e+07	40			1st				12	1200000000		120
2nd	>	>	7	2	70000000		70			2nd				17	1700000000		154.545
3rd	>	>	7	2	70000000		70	60		3rd			24	17	1700000000	2.88675e+08	121.429	131.991
120 m	10^-3	10^-4	10^-5	10^-6						120 m	10^-3	11	10^-5	10^-6
1st	>	>	7	0	210000000	40000000	210			1st				11	1100000000		110
2nd	>	>	11	0	250000000		250			2nd				12	1200000000		109.091
3rd	>	>	5	0	290000000		290	250		3rd				14	1400000000	1.52753e+08	100	106.364
180 m	10^-3	10^-4	10^-5	10^-6						180 m	10^-3	10^-4	10^-5	10^-6
1st	>	>	>	9	300000000	0	300			1st				10	1000000000		100
2nd	>	>	>	4	300000000		300			2nd				10	1000000000		90.9091
3rd	>	>	>	9	300000000		300	300		3rd				13	1300000000	1.73205e+08	92.8571	94.5887
ABAPSP-55										ABAPSP-64
0 m	10^-3	10^-4	10^-5	10^-6	Choose	SD	%Survival	AVERAGE		0 m	10^-3	10^-4	10^-5	10^-6	Choose	SD	%Survival	AVERAGE
1st		5			5000000		100			1st			9	3	300000000		100
2nd		7			7000000		100			2nd			10	3	300000000		100
3rd		9			9000000	2000000	100	100		3rd			14	3	300000000	0	100	100
30 m	10^-3	10^-4	10^-5	10^-6						30 m	10^-3	10^-4	10^-5	10^-6
1st		4			4000000		80			1st			4	4	400000000		133.333
2nd		7			7000000		100			2nd			8	5	500000000		166.667
3rd		8			8000000	2.08167e+06	88.8889	89.6296		3rd			14	5	500000000	5.7735e+07	166.667	155.556
60 m	10^-3	10^-4	10^-5	10^-6						60 m	10^-3	10^-4	10^-5	10^-6
1st		6			6000000		120			1st			10	6	600000000		200
2nd		6			6000000		85.7143			2nd			10	6	600000000		200
3rd		8			8000000	1.1547e+06	88.8889	98.2011		3rd			17	11	1100000000	2.88675e+08	366.667	255.556
120 m	10^-3	10^-4	10^-5	10^-6						120 m	10^-3	10^-4	10^-5	10^-6
1st		2			2000000		40			1st				9	900000000		300
2nd		2			2000000		28.5714			2nd				11	1100000000		366.667
3rd		2			2000000	0	22.2222	90.7937		3rd				12	1200000000	1.52753e+08	400	355.556
180 m	10^-3	10^-4	10^-5	10^-6						180 m	10^-3	10^-4	10^-5	10^-6
1st		4			4000000		80			1st			23	9	900000000		300
2nd		6			6000000		85.7143			2nd			28	12	1200000000		400
3rd		6			6000000	1.1547e+06	66.6667	77.4603		3rd			33	12	1200000000	1.73205e+08	400	366.667
ABMYSP-101										ABMYSP-182
0 m	10^-3	10^-4	10^-5	10^-6	Choose	SD	%Survival	AVERAGE		0 m	10^-3	10^-4	10^-5	10^-6	Choose	SD	%Survival	AVERAGE
1st			5	0	50000000		100			1st			6	3	60000000		100
2nd			5	0	50000000		100			2nd			12	3	120000000		100
3rd			8	0	80000000	1.73206e+07	100	100		3rd			12	4	120000000	3.4641e+07	100	100
30 m	10^-3	10^-4	10^-5	10^-6	#VALUE!					30 m	10^-3	10^-4	10^-5	10^-6
1st			10	3	100000000		200			1st			6	2	60000000		100
2nd			9	0	90000000		180			2nd			7	3	70000000		58.3333
3rd			7	3	70000000	1.52754e+07	87.5	155.833		3rd			7	0	70000000	5.7735e+06	58.3333	72.2222
60 m	10^-3	10^-4	10^-5	10^-6	#VALUE!					60 m	10^-3	10^-4	10^-5	10^-6
1st			12	0	120000000		240			1st			6	1	60000000		100
2nd			12	0	120000000		240			2nd			6	3	60000000		50
3rd			6	0	60000000	3.46412e+07	75	185		3rd			7	3	70000000	5.7735e+06	58.3333	69.4444
120 m	10^-3	10^-4	10^-5	10^-6	#VALUE!					120 m	10^-3	10^-4	10^-5	10^-6
1st			7	1	70000000		140			1st			7	2	70000000		116.667
2nd			14	4	140000000		280			2nd			7	3	70000000		58.3333
3rd			10	9	100000000	3.51189e+07	125	181.667		3rd			7	0	70000000	0	58.3333	77.7778
180 m	10^-3	10^-4	10^-5	10^-6	#VALUE!					180 m	10^-3	10^-4	10^-5	10^-6
1st			10	6	100000000		200			1st			6	3	60000000		100
2nd			10	7	100000000		200			2nd			12	3	120000000		100
3rd			10	10	100000000	7.67288	125	175		3rd			12	4	120000000	3.4641e+07	100	100
ABMYSP-187										ABMYSP-797
0 m	10^-3	10^-4	10^-5	10^-6	Choose	SD	%Survival	AVERAGE		0 m	10^-3	10^-4	10^-5	10^-6	Choose	SD	%Survival	AVERAGE
1st		11			11000000		100			1st			10		100000000		100
2nd		16			16000000		100			2nd			13		130000000		100
3rd		17			17000000	3.21455e+06	100	100		3rd			13		130000000	1.73205e+07	100	100
30 m	10^-3	10^-4	10^-5	10^-6						30 m	10^-3	10^-4	10^-5	10^-6
1st		18			18000000		163.636			1st			12		120000000		120
2nd		20			20000000		125			2nd			24		240000000		184.615
3rd		17			17000000	1.52753e+06	100	129.545		3rd			24		240000000	6.9282e+07	184.615	163.077
60 m	10^-3	10^-4	10^-5	10^-6						60 m	10^-3	10^-4	10^-5	10^-6
1st		19			19000000		172.727			1st			11		110000000		110
2nd		19			19000000		118.75			2nd			27		270000000		207.692
3rd		20			20000000	577350	117.647	136.375		3rd			28		280000000	9.53939e+07	215.385	177.692
120 m	10^-3	10^-4	10^-5	10^-6						120 m	10^-3	10^-4	10^-5	10^-6
1st		18			18000000		163.636			1st			20		200000000		200
2nd		18			18000000		112.5			2nd			23		230000000		176.923
3rd		18			18000000	0	105.882	127.34		3rd			20		200000000	1.73205e+07	153.846	176.923
180 m	10^-3	10^-4	10^-5	10^-6						180 m	10^-3	10^-4	10^-5	10^-6
1st			11		110000000		1000			1st			28		280000000		280
2nd			14		140000000		875			2nd			28		280000000		215.385
3rd			14		140000000	1.73205e+07	823.529	899.51		3rd			30		300000000	1.1547e+07	230.769	242.051
AB1039										AB1492-09
0 m	10^-3	10^-4	10^-5	10^-6	Choose	SD	%Survival	AVERAGE		0 m	10^-3	10^-4	10^-5	10^-6	Choose	SD	%Survival	AVERAGE
1st	10				1000000		100			1st			16		160000000		100
2nd	10				1000000		100			2nd			20		200000000		100
3rd	10				1000000	0	100	100		3rd			22		220000000	3.05505e+07	100	100
30 m	10^-3	10^-4	10^-5	10^-6						30 m	10^-3	10^-4	10^-5	10^-6
1st	5				500000		50			1st		17	9	2	90000000		56.25
2nd	10				1000000		100			2nd		18	9	8	90000000		55
3rd	11				1100000	321455	110	86.6667		3rd		20	11	10	110000000	1.1547e+07	50	53.75
60 m	10^-3	10^-4	10^-5	10^-6						60 m	10^-3	10^-4	10^-5	10^-6
1st	0				100		0.01			1st	>	16	6	1	60000000		37.5
2nd	0				100		0.01			2nd	>	17	5	3	50000000		25
3rd	0				100	0	0.01	0.01		3rd	>	18	6	4	60000000	5.7735e+06	27.2727	29.9242
120 m	10^-3	10^-4	10^-5	10^-6						120 m	10^-3	10^-4	10^-5	10^-6
1st	0				100		0.01			1st	>	18	8	0	80000000		50
2nd	0				100		0.01			2nd	>	25	6	0	60000000		30
3rd	0				100	0	0.01	0.01		3rd	>	28	6	0	60000000	1.1547e+07	27.2727	35.7576
180 m	10^-3	10^-4	10^-5	10^-6						180 m	10^-3	10^-4	10^-5	10^-6
1st	0				100		0.01			1st	>	12	7	3	70000000		43.75
2nd	0				100		0.01			2nd	>	15	8	4	80000000		40
3rd	0				100	0	0.01	0.01		3rd	>	11	10	4	100000000	1.52753e+07	45.4545	43.0682
AB3396										AB4452-09
0 m	10^-3	10^-4	10^-5	10^-6	Choose	SD	%Survival	AVERAGE		0 m	10^-3	10^-4	10^-5	10^-6	SD	Choose	%Survival	AVERAGE
1st	>	18			18000000		100			1st	>	8				8000000	100
2nd	>	18			18000000		100			2nd	>	9				9000000	100
3rd	>	18			18000000	0	100	100		3rd	>	13			2.64575e+06	13000000	100	100
30 m	10^-3	10^-4	10^-5	10^-6						30 m	10^-3	10^-4	10^-5	10^-6
1st	>	17			17000000		94.4444			1st	>	2				2000000	25
2nd	>	17			17000000		94.4444			2nd	>	2				2000000	22.2222
3rd	>	18			18000000	577350	100	96.2963		3rd	>	3			577350	3000000	23.0769	23.433
60 m	10^-3	10^-4	10^-5	10^-6						60 m	10^-3	10^-4	10^-5	10^-6
1st	>	24			24000000		133.333			1st	0	0	0	0		100	0.00125
2nd	>	24			24000000		133.333			2nd	2	0	0	0		200000	2.22222
3rd	>	24			24000000	0	133.333	133.333		3rd	1	0	0	0	99950	100000	0.769231	0.997568
120 m	10^-3	10^-4	10^-5	10^-6						120 m	10^-3	10^-4	10^-5	10^-6
1st	>	25			25000000		138.889			1st	0	0	0	0		100	0.00125
2nd	>	25			25000000		138.889			2nd	0	0	0	0		100	0.00111111
3rd	>	25			25000000	0	138.889	138.889		3rd	0	0	0	0	0	100	0.000769231	0.00104345
180 m	10^-3	10^-4	10^-5	10^-6						180 m	10^-3	10^-4	10^-5	10^-6
1st	>	20			20000000		111.111			1st	0	0	0	0		100	0.00125
2nd	>	20			20000000		111.111			2nd	0	0	0	0		100	0.00111111
3rd	>	20			20000000	0	111.111	111.111		3rd	0	0	0	0	0	100	0.000769231	0.00104345
AB11										ABJNH-403
0 m	10^-3	10^-4	10^-5	10^-6	Choose	SD	%Survival	AVERAGE		0 m	10^-3	10^-4	10^-5	10^-6	Choose	SD	%Survival	AVERAGE
1st			4	2	40000000		100			1st		8			8000000		100
2nd			7	3	70000000		100			2nd		11			11000000		100
3rd			10		100000000	30000000	100	100		3rd		12			12000000	2.08167e+06	100	100
30 m	10^-3	10^-4	10^-5	10^-6						30 m	10^-3	10^-4	10^-5	10^-6
1st		17	8	6	80000000		200			1st		18			18000000		225
2nd		17	10	6	100000000		142.857			2nd		20			20000000		181.818
3rd		17	11	6	110000000	1.52753e+07	110	150.952		3rd		20			20000000	1.1547e+06	166.667	191.162
60 m	10^-3	10^-4	10^-5	10^-6						60 m	10^-3	1	10^-5	10^-6
1st		12	9	1	90000000		225			1st		15			15000000		187.5
2nd		22	10	2	100000000		142.857			2nd		19			19000000		172.727
3rd		12	12	2	120000000	1.52753e+07	120	162.619		3rd		25			25000000	5.03322e+06	208.333	189.52
120 m	10^-3	10^-4	10^-5	10^-6						120 m	10^-3	10^-4	10^-5	10^-6
1st			11	4	110000000		275			1st			8		80000000		1000
2nd			13	4	130000000		185.714			2nd			11		110000000		1000
3rd			15	4	150000000	20000000	150	203.571		3rd			11		110000000	1.73205e+07	916.667	972.222
180 m	10^-3	10^-4	10^-5	10^-6						180 m	10^-3	10^-4	10^-5	10^-6
1st			13	12	130000000		325			1st			12		120000000		1500
2nd			13	13	130000000		185.714			2nd			14		140000000		1272.73
3rd			13	17	130000000	0	130	213.571		3rd			14		140000000	1.1547e+07	1166.67	1313.13
AB15										ABAPP-61
0 m	10^-3	10^-4	10^-5	10^-6	Choose	SD	%Survival	AVERAGE		0 m	10^-3	10^-4	10^-5	10^-6	Choose	SD	%Survival	AVERAGE
1st	>	17	1	2	17000000		100			1st		18			18000000		100
2nd	>	17	4	2	17000000		100			2nd		20			20000000		100
3rd	>	12	6	2	12000000	2.88675e+06	100	100		3rd		22			22000000	2000000	100	100
30 m	10^-3	10^-4	10^-5	10^-6						30 m	10^-3	10^-4	10^-5	10^-6
1st	>	18	15	1	18000000		105.882			1st		17			17000000		94.4444
2nd	>	25	3	1	25000000		147.059			2nd		18			18000000		90
3rd	>	25	6	1	25000000	4.04145e+06	208.333	153.758		3rd		18			18000000	577350	81.8182	88.7542
60 m	10^-3	10^-4	10^-5	10^-6						60 m	10^-3	10^-4	10^-5	10^-6	#VALUE!
1st	>	20	8	0	20000000		117.647			1st		13			13000000		72.2222
2nd	>	18	8	1	18000000		105.882			2nd		17			17000000		85
3rd	>	22	8	2	22000000	2000000	183.333	135.621		3rd		17			17000000	2.3094e+06	77.2727	78.165
120 m	10^-3	10^-4	10^-5	10^-6						120 m	10^-3	10^-4	10^-5	10^-6	#VALUE!
1st	>	30	4	0	30000000		176.471			1st		7			7000000		38.8889
2nd	>	33	18	1	33000000		194.118			2nd		10			10000000		50
3rd	>	33	12	1	33000000	1.73205e+06	275	215.196		3rd		12			12000000	2.51661e+06	54.5455	47.8114
180 m	10^-3	10^-4	10^-5	10^-6						180 m	10^-3	10^-4	10^-5	10^-6	#VALUE!
1st	>	30	2	0	30000000		176.471			1st		8			8000000		44.4444
2nd	>	30	3	2	30000000		176.471			2nd		10			10000000		50
3rd	>	30	1	2	30000000	0	250	200.98		3rd		10			10000000	1.1547e+06	45.4545	46.633
AB8										AB14
0 m	10^-3	10^-4	10^-5	10^-6	Choose	SD	%Survival	AVERAGE		0 m	10^-3	10^-4	10^-5	10^-6	Choose	SD	%Survival	AVERAGE
1st			10	5	100000000		100			1st			5	3	50000000		100
2nd			10	5	100000000		100			2nd			8	5	80000000		100
3rd			12	11	120000000	1.1547e+07	100	100		3rd			12	5	120000000	3.51188e+07	100	100
30 m	10^-3	10^-4	10^-5	10^-6						30 m	10^-3	10^-4	10^-5	10^-6
1st			10	4	100000000		100			1st			4	2	40000000		80
2nd			12	7	120000000		120			2nd			6	5	60000000		75
3rd			14	8	140000000	20000000	116.667	112.222		3rd			8	7	80000000	20000000	66.6667	73.8889
60 m	10^-3	10^-4	10^-5	10^-6						60 m	10^-3	10^-4	10^-5	10^-6
1st			10	8	100000000		100			1st			5	2	50000000		100
2nd			13	8	130000000		130			2nd			7	5	70000000		87.5
3rd			16	10	160000000	30000000	133.333	121.111		3rd			10	8	100000000	2.51661e+07	83.3333	90.2778
120 m	10^-3	10^-4	10^-5	10^-6						120 m	10^-3	10^-4	10^-5	10^-6
1st			12	10	120000000		120			1st			6	7	60000000		120
2nd			14	11	140000000		140			2nd			10	20	100000000		125
3rd			16	12	160000000	20000000	133.333	131.111		3rd			10	20	100000000	2.3094e+07	83.3333	109.444
180 m	10^-3	10^-4	10^-5	10^-6						180 m	10^-3	10^-4	10^-5	10^-6
1st			14	4	140000000		140			1st			14	9	140000000		280
2nd			17	7	170000000		170			2nd			14	9	140000000		175
3rd			17	4	170000000	1.73205e+07	141.667	451.667		3rd			14	9	140000000	67.5817	116.667	190.556
AB724										AB1719-09
0 m	10^-3	10^-4	10^-5	10^-6	Choose	SD	%Survival	AVERAGE		0 m	10^-3	10^-4	10^-5	10^-6	Choose	SD	%Survival	AVERAGE
1st				8	800000000		100			1st				2	200000000		100
2nd				8	800000000		100			2nd				2	200000000		100
3rd				8	800000000	0	100	100		3rd				2	200000000	0	100	100
30 m	10^-3	10^-4	10^-5	10^-6						30 m	10^-3	10^-4	10^-5	10^-6
1st				5	500000000		62.5			1st				3	300000000		150
2nd				8	800000000		150			2nd				4	400000000		250
3rd				12	1200000000	3.51188e+08	150	120.833		3rd				5	500000000	100000000	250	216.667
60 m	10^-3	10^-4	10^-5	10^-6						60 m	10^-3	10^-4	10^-5	10^-6
1st				15	1500000000		187.5			1st				8	800000000		400
2nd				15	1500000000		187.5			2nd				3	300000000		150
3rd				17	1700000000	1.1547e+08	212.5	195.833		3rd				3	300000000	2.88675e+08	150	233.333
120 m	10^-3	10^-4	10^-5	10^-6						120 m	10^-3	10^-4	10^-5	10^-6
1st				16	1600000000		200			1st				9	900000000		450
2nd				18	1800000000		225			2nd				8	800000000		400
3rd				22	2200000000	3.05505e+08	275	233.333		3rd				7	700000000	100000000	350	400
180 m	10^-3	10^-4	10^-5	10^-6						180 m	10^-3	10^-4	10^-5	10^-6
1st				13	1300000000		162.5			1st				11	1100000000		550
2nd				30	3000000000		375			2nd				14	1400000000		700
3rd				30	3000000000	9.81495e+08	375	304.167		3rd				14	1400000000	1.73205e+08	700	650
AB2792
0 m	10^-3	10^-4	10^-5	10^-6	Choose	SD	%Survival	AVERAGE
1st				6	600000000		100
2nd				9	900000000		100
3rd				15	1500000000	4.58258e+08	100	100
30 m	10^-3	10^-4	10^-5	10^-6
1st				14	1400000000		233.333
2nd				15	1500000000		100
3rd				9	900000000	3.21455e+08	60	131.111
60 m	10^-3	10^-4	10^-5	10^-6
1st				20	2000000000		333.333
2nd				22	2200000000		244.444
3rd				23	2300000000	1.52753e+08	153.333	243.704
120 m	10^-3	10^-4	10^-5	10^-6
1st				24	2400000000		400
2nd				25	2500000000		277.778
3rd				20	2000000000	2.64575e+08	133.333	270.37
180 m	10^-3	10^-4	10^-5	10^-6
1st				30	3000000000		500
2nd				30	3000000000		333.333
3rd				30	3000000000	0	200	344.444
AB1										ABAPSP-444
0 m	10^-3	10^-4	10^-5	10^-6	SD	Choose	%Survival	AVERAGE		0 m	10^-3	10^-4	10^-5	10^-6	Choose	SD	%Survival	AVERAGE
1st	>	19		3		19000000	100			1st		12	3	2	12000000		100
2nd	>	19		3		19000000	100			2nd		12	3		12000000		100
3rd	>	20			577350	20000000	100	100		3rd		17	4		17000000	2.88675e+06	100	100
30 m	10^-3	10^-4	10^-5	10^-6						30 m	10^-3	10^-4	10^-5	10^-6
1st	>	18		1		18000000	94.7368			1st		13	2		13000000		108.333
2nd	>	25		7		25000000	131.579			2nd		14	6		14000000		116.667
3rd	>	25		7	4.04145e+06	25000000	125	117.105		3rd		15	4		15000000	1000000	88.2353	104.412
60 m	10^-3	10^-4	10^-5	10^-6						60 m	10^-3	10^-4	10^-5	10^-6
1st	>	30		7		30000000	157.895			1st		16	3		16000000		133.333
2nd	>	30		2		30000000	157.895			2nd		16	3		16000000		133.333
3rd	>	30		3	0	30000000	150	155.263		3rd		20	6		20000000	2.3094e+06	117.647	128.105
120 m	10^-3	10^-4	10^-5	10^-6						120 m	10^-3	10^-4	10^-5	10^-6
1st	>	30		4		30000000	157.895			1st		18			18000000		150
2nd	>	30		4		30000000	157.895			2nd		19			19000000		158.333
3rd	>	27		4	1.73205e+06	27000000	135	150.263		3rd		19			19000000	577350	111.765	140.033
180 m	10^-3	10^-4	10^-5	10^-6						180 m	10^-3	10^-4	10^-5	10^-6
1st	>	13		3		13000000	68.4211			1st		18			18000000		150
2nd	>	15		3		15000000	78.9474			2nd		19			19000000		158.333
3rd	>	20		3	3.60555e+06	20000000	100	82.4561		3rd		20			20000000	1000000	117.647	141.993
AB6
0 m	10^-3	10^-4	10^-5	10^-6	Choose	SD	%Survival	AVERAGE
1st		6	5	3	6000000		100
2nd		11	12	8	11000000		100
3rd		14			14000000	4.04145e+06	100	100
30 m	10^-3	10^-4	10^-5	10^-6
1st		6	4	3	6000000		100
2nd		8	7	4	8000000		72.7273
3rd		12			12000000	3.05505e+06	85.7143	86.1472
60 m	10^-3	10^-4	10^-5	10^-6
1st	8	4	1	0	4000000		66.6667
2nd	9	5	1	0	5000000		45.4545
3rd	7	7	2	0	7000000	1.52753e+06	50	54.0404
120 m	10^-3	10^-4	10^-5	10^-6
1st	6	2	1	0	2000000		33.3333
2nd	4	3		0	3000000		27.2727
3rd	12	5		0	5000000	1.52753e+06	35.7143	32.1068
180 m	10^-3	10^-4	10^-5	10^-6
1st	11	2	0	0	2000000		33.3333
2nd	12	3	0	1	3000000		27.2727
3rd	13	5	2	1	5000000	1.52753e+06	35.7143	32.1068
AB9										AB7
0 m	10^-3	10^-4	10^-5	10^-6	Choose	SD	%Survival	AVERAGE		0 m	10^-3	10^-4	10^-5	10^-6	Choose	SD	%Survival	AVERAGE
1st	>	18	4	1	18000000		100			1st		20	4		40000000		100
2nd	>	20	7	2	20000000		100			2nd		20	5		50000000		100
3rd	>	23	7	4	23000000	2.51661e+06	100	100		3rd		18	9		90000000	2.64575e+07	100	100
30 m	10^-3	10^-4	10^-5	10^-6						30 m	10^-3	10^-4	10^-5	10^-6
1st	7	2	0	0	700000		3.88889			1st		7	3		30000000		75
2nd	10	2	0	0	1000000		5			2nd		7	5		50000000		100
3rd	12	3	0	0	1200000	251661	5.21739	4.70209		3rd		7	7		70000000	20000000	77.7778	84.2593
60 m	10^-3	10^-4	10^-5	10^-6						60 m	10^-3	10^-4	10^-5	10^-6
1st	2	1	0	0	200000		1.11111			1st			1		10000000		25
2nd	3	0	0	0	300000		1.5			2nd			1		10000000		20
3rd	3	0	0	0	300000	57735	1.30435	1.30515		3rd			3		30000000	1.1547e+07	33.3333	26.1111
120 m	10^-3	10^-4	10^-5	10^-6						120 m	10^-3	10^-4	10^-5	10^-6
1st	2	0	0	0	200000		1.11111			1st			0		100		0.00025
2nd	2	0	0	0	200000		1			2nd			1		10000000		20
3rd	3	0	0	0	300000	57735	1.30435	1.13849		3rd			3		30000000	1.52752e+07	33.3333	17.7779
180 m	10^-3	10^-4	10^-5	10^-6						180 m	10^-3	10^-4	10^-5	10^-6
1st	0	0	0	0	100		0.000555556			1st			0		100		0.00025
2nd	0	0	0	0	100		0.0005			2nd			1		10000000		20
3rd	0	0	0	0	100	0	0.000434783	0		3rd			2		20000000	9.99995e+06	22.2222	14.0742
ABAPSP-185
0 m	10^-3	10^-4	10^-5	10^-6	Choose	SD	%Survival	AVERAGE		ABAPSP-216
1st		23			23000000		100			0 m	10^-3	10^-4	10^-5	10^-6	Choose	SD	%Survival	AVERAGE
2nd		20			20000000		100			1st		10			10000000		100
3rd		23			23000000	1.73205e+06	100	100		2nd		12			12000000		100
30 m	10^-3	10^-4	10^-5	10^-6						3rd		15			15000000	2.51661e+06	100	100
1st		15			15000000		65.2174			30 m	10^-3	10^-4	10^-5	10^-6
2nd		17			17000000		85			1st		8			8000000		80
3rd		19			19000000	2000000	82.6087	77.6087		2nd		8			8000000		66.6667
60 m	10^-3	10^-4	10^-5	10^-6						3rd		11			11000000	1.73205e+06	73.3333	73.3333
1st		18			18000000		78.2609			60 m	10^-3	10^-4	10^-5	10^-6
2nd		14			14000000		70			1st		11			11000000		110
3rd		18			18000000	2.3094e+06	78.2609	75.5072		2nd		14			14000000		116.667
120 m	10^-3	10^-4	10^-5	10^-6						3rd		14			14000000	1.73205e+06	93.3333	106.667
1st		23			23000000		100			120 m	10^-3	10^-4	10^-5	10^-6
2nd		20			20000000		100			1st		11			11000000		110
3rd		20			20000000	1.73205e+06	86.9565	95.6522		2nd		11			11000000		91.6667
180 m	10^-3	10^-4	10^-5	10^-6						3rd		11			11000000	0	73.3333	91.6667
1st		23			23000000		100			180 m	10^-3	10^-4	10^-5	10^-6
2nd		24			24000000		120			1st		13			13000000		130
3rd		24			24000000	577350	104.348	108.116		2nd		13			13000000		108.333
										3rd		13			13000000	0	86.6667	108.333
ABMYH-1652
0 m	10^-3	10^-4	10^-5	10^-6	Choose	SD	%Survival	AVERAGE		ABAPSP-475
1st	>	17	4		17000000		100			0 m	10^-3	10^-4	10^-5	10^-6	Choose	SD	%Survival	AVERAGE
2nd	>	18	4		18000000		100			1st		8	4	1	8000000		100
3rd	>	18	4		18000000	577350	100	100		2nd		11	5	1	11000000		100
30 m	10^-3	10^-4	10^-5	10^-6						3rd		12	6	2	12000000	2.08167e+06	100	100
1st	>	17	4	2	17000000		100			30 m	10^-3	10^-4	10^-5	10^-6
2nd	>	19	10	2	19000000		105.556			1st		7	2	0	7000000		87.5
3rd	>	20	10	2	20000000	1.52753e+06	111.111	105.556		2nd		11	2	0	11000000		100
60 m	10^-3	10^-4	10^-5	10^-6						3rd		12	3	0	12000000	2.64575e+06	100	95.8333
1st	>	18	3	3	18000000		105.882			60 m	10^-3	10^-4	10^-5	10^-6
2nd	>	20	9	1	20000000		111.111			1st		5	1	0	5000000		62.5
3rd	>	20	9	3	20000000	1.93333e+07	111.111	109.368		2nd		6	1	0	6000000		54.5455
120 m	10^-3	10^-4	10^-5	10^-6						3rd		6	2	1	6000000	577350	50	55.6818
1st		17			17000000		100			120 m	10^-3	10^-4	10^-5	10^-6
2nd		17			17000000		94.4444			1st		5	3	0	5000000		62.5
3rd		19			19000000	1.1547e+06	105.556	100		2nd		8	4	0	8000000		72.7273
180 m	10^-3	10^-4	10^-5	10^-6						3rd		13	5	2	13000000	4.04145e+06	108.333	81.1869
1st		15			15000000		88.2353			180 m	10^-3	10^-4	10^-5	10^-6
2nd		19			19000000		105.556			1st		11	3	1	11000000		137.5
3rd		21			21000000	3.05505e+06	116.667	103.486		2nd		13	3	1	13000000		118.182
										3rd		13	3	1	13000000	1.1547e+06	108.333	121.338
ABMYSP-477
0 m	10^-3	10^-4	10^-5	10^-6	Choose	SD	%Survival	AVERAGE		ABMYSP-479
1st			7		70000000		100			0 m	10^-3	10^-4	10^-5	10^-6	Choose	SD	%Survival	AVERAGE
2nd			10		100000000		100			1st			3		30000000		100
3rd			11		110000000	2.08167e+07	100	100		2nd			5		50000000		100
30 m	10^-3	10^-4	10^-5	10^-6						3rd			9		90000000	3.05505e+07	100	100
1st			10		100000000		142.857			30 m	10^-3	10^-4	10^-5	10^-6
2nd			10		100000000		100			1st			3		30000000		100
3rd			16		160000000	3.4641e+07	145.455	129.437		2nd			3		30000000		60
60 m	10^-3	10^-4	10^-5	10^-6						3rd			4		40000000	5.7735e+06	44.4444	68.1481
1st			10		100000000		142.857			60 m	10^-3	10^-4	10^-5	10^-6
2nd			10		100000000		100			1st			2		20000000		66.6667
3rd			10		100000000	0	90.9091	111.255		2nd			2		20000000		40
120 m	10^-3	10^-4	10^-5	10^-6						3rd			3		30000000	5.7735e+06	33.3333	46.6667
1st			5		50000000		71.4286			120 m	10^-3	10^-4	10^-5	10^-6
2nd			14		140000000		140			1st			3		30000000		100
3rd			16		160000000	5.85947e+07	145.455	118.961		2nd			3		30000000		60
180 m	10^-3	10^-4	10	10^-6						3rd			3		30000000	0	33.3333	64.4444
1st			10		100000000		142.857			180 m	10^-3	10^-4	10^-5	10^-6
2nd			10		100000000		100			1st	>		5		50000000		166.667
3rd			15		150000000	2.88675e+07	136.364	126.407		2nd	>		7		70000000		140
										3rd	>		7		70000000	1.1547e+07	77.7778	128.148
ABMASP-366										ABMYSP-517
0 m	10^-3	10^-4	10^-5	10^-6	Choose	SD	%Survival	AVERAGE		0 m	10^-3	10^-4	10^-5	10^-6	Choose	%Survival	AVERAGE	SD
1st		5			5000000		100			1st		6	5	4	6000000	100
2nd		11			11000000		100			2nd		6	7	5	6000000	100
3rd		12			12000000	3.78594e+06	100	100		3rd		8	10	6	8000000	100	100	1.1547e+06
30 m	10^-3	10^-4	10^-5	10^-6						30 m	10^-3	10^-4	10^-5	10^-6
1st		10			10000000		200			1st		10	3	1	10000000	166.667
2nd		11			11000000		100			2nd		11	5	3	11000000	183.333
3rd		11			11000000	577350	91.6667	130.556		3rd		12	7	4	12000000	150	166.667	16.6667
60 m	10^-3	1	10^-5	10^-6						60 m	10^-3	10^-4	10^-5	10^-6
1st		7			7000000		140			1st		10	2	0	10000000	166.667
2nd		7			7000000		63.6364			2nd		15	4	1	15000000	250
3rd		7			7000000	0	58.3333	87.3232		3rd		17	4	3	17000000	212.5	209.722	41.7361
120 m	10^-3	10^-4	10^-5	10^-6						120 m	10^-3	10^-4	10^-5	10^-6
1st		7			7000000		140			1st		19	5	4	19000000	316.667
2nd		9			9000000		81.8182			2nd		21	5	5	21000000	350
3rd		10			10000000	1.52753e+06	83.3333	101.717		3rd		21	9	6	21000000	262.5	309.722	44.1614
180 m	10^-3	10^-4	10^-5	10^-6						180 m	10^-3	10^-4	10^-5	10^-6
1st		9			9000000		180			1st		9	2	0	9000000	150
2nd		9			9000000		81.8182			2nd		9	4	1	9000000	150
3rd		9			9000000	0	75	112.273		3rd		14	6	1	14000000	175	158.333	14.4338
ABMASP-491										ABAPSP-379
0 m	10^-3	10^-4	10^-5	10^-6	Choose	SD	%Survival	AVERAGE		0 m	10^-3	10^-4	10^-5	10^-6	Choose	SD	%Survival	AVERAGE
1st			9	2	90000000		100			1st			18	2	200000000		100
2nd			10	2	100000000		100			2nd			19	2	200000000		100
3rd			12	6	120000000	1.52753e+07	100	100		3rd			19	4	400000000	1.1547e+08	100	100
30 m	10^-3	10^-4	10^-5	10^-6						30 m	10^-3	10^-4	10^-5	10^-6
1st			8	2	80000000		88.8889			1st		2	4	1	100000000		50
2nd			9	3	90000000		90			2nd		3	4	1	100000000		50
3rd			9	4	90000000	5.7735e+06	75	84.6296		3rd		3	5	1	100000000	0	25	41.6667
60 m	10^-3	1	10^-5	10^-6						60 m	10^-3	10^-4	10^-5	1
1st			12	2	120000000		133.333			1st		1	4	1	100000000		50
2nd			12	3	120000000		120			2nd		2	4	2	200000000		100
3rd			13	3	130000000	5.7735e+06	108.333	120.556		3rd		2	6	3	300000000	100000000	75	75
120 m	10^-3	10^-4	10^-5	10^-6						120 m	10^-3	10^-4	10^-5	10^-6
1st		25	13	6	130000000		144.444			1st	>	11	6	1	100000000		50
2nd		26	14	8	140000000		140			2nd	>	12	6	1	100000000		50
3rd		27	15	9	150000000	10000000	125	136.481		3rd	>	11	6	7	700000000	3.4641e+08	175	91.6667
180 m	10^-3	10^-4	10^-5	10^-6						180 m	10^-3	10^-4	10^-5	10^-6
1st			10	2	100000000		111.111			1st	>		11	2	200000000		100
2nd			11	3	110000000		110			2nd	>		11	2	200000000		100
3rd			11	4	110000000	5.7735e+06	91.6667	104.259		3rd	>		14	7	700000000	2.88675e+08	175	125
ABAPU-469										ABAPSP-195
0 m	10^-3	10^-4	10^-5	10^-6	Choose	SD	%Survival	AVERAGE		0 m	10^-3	10^-4	10^-5	10^-6	Choose	SD	%Survival	AVERAGE
1st			12	4	120000000		100			1st		16			16000000		100
2nd			14	6	140000000		100			2nd		15			15000000		100
3rd			15	6	150000000	1.52753e+07	100	100		3rd		15			15000000	577350	100	100
30 m	10^-3	10^-4	10^-5	10^-6						30 m	10^-3	10^-4	10^-5	10^-6
1st			14	7	140000000		116.667			1st		18			18000000		112.5
2nd			15	8	150000000		107.143			2nd		20			20000000		133.333
3rd			17	9	170000000	1.52753e+07	113.333	112.381		3rd		20			20000000	1.1547e+06	133.333	126.389
60 m	10^-3	1	10^-5	10^-6						60 m	10^-3	10^-4	10^-5	10^-6
1st			11	3	110000000		91.6667			1st	>	20			20000000		125
2nd			12	3	120000000		85.7143			2nd	>	23			23000000		153.333
3rd			13	4	130000000	10000000	86.6667	88.0159		3rd	>	23			23000000	1.73205e+06	153.333	143.889
120 m	10^-3	10^-4	10^-5	10^-6						120 m	10^-3	10^-4	10^-5	10^-6
1st			13	7	130000000		108.333			1st		16			16000000		100
2nd			17	9	170000000		121.429			2nd		17			17000000		113.333
3rd			17	11	170000000	2.3094e+07	113.333	114.365		3rd		20			20000000	2.08167e+06	133.333	115.556
180 m	10^-3	10^-4	10^-5	10^-6						180 m	10^-3	10^-4	10^-5	10^-6
1st			14	4	140000000		116.667			1st		14			14000000		87.5
2nd			16	5	160000000		114.286			2nd		15			15000000		100
3rd			19	8	190000000	2.51661e+07	126.667	119.206		3rd		17			17000000	1.52753e+06	113.333	100.278
ABMYSP-494										ABAPU-722
0 m	10^-3	10^-4	10^-5	10^-6	Choose	SD	%Survival	AVERAGE		0 m	10^-3	10^-4	10^-5	10^-6	Choose	SD	%Survival	AVERAGE
1st	>	6	3	3	6000000		100			1st			5		50000000		100
2nd	>	6	5	3	6000000		100			2nd			7		70000000		100
3rd	>	10	8	4	10000000	2.3094e+06	100	100		3rd			8		80000000	1.52753e+07	100	100
30 m	10^-3	10^-4	10^-5	10^-6						30 m	10^-3	10^-4	10^-5	10^-6
1st	5	5	0		5000000		83.3333			1st			6		60000000		120
2nd	6	6	2		6000000		100			2nd			6		60000000		85.7143
3rd	7	7	4		7000000	1000000	70	84.4444		3rd			9		90000000	1.73205e+07	112.5	106.071
60 m	10^-3	1	10^-5	10^-6						60 m	10^-3	10^-4	10^-5	10^-6
1st	>	4	0	0	4000000		66.6667			1st			8		80000000		160
2nd	>	6	1	1	6000000		100			2nd			10		100000000		142.857
3rd	>	8	1	1	8000000	2000000	80	82.2222		3rd			10		100000000	1.1547e+07	125	142.619
120 m	10^-3	10^-4	10^-5	10^-6						120 m	10^-3	10^-4	10^-5	10^-6
1st	>	4	1	0	4000000		66.6667			1st			8		80000000		160
2nd	>	4	1	1	4000000		66.6667			2nd			10		100000000		142.857
3rd	>	9	2	1	9000000	2.88675e+06	90	74.4444		3rd			11		110000000	1.52753e+07	137.5	146.786
180 m	10^-3	10^-4	10^-5	10^-6						180 m	10^-3	10^-4	10^-5	10^-6
1st	>	4	0	1	4000000		66.6667			1st			5		50000000		100
2nd	>	5	1	2	5000000		83.3333			2nd			6		60000000		85.7143
3rd	>	6	4	3	6000000	1000000	60	70		3rd			6		60000000	5.7735e+06	75	86.9048
ABMYSP-207										ABMYSP-6
0 m	10^-3	10^-4	10^-5	10^-6	Choose	SD	%Survival	AVERAGE		0 m	10^-3	10^-4	10^-5	10^-6	Choose	SD	%Survival	AVERAGE
1st		12		7	12000000		100			1st		16	7	1	16000000		100
2nd		14		10	14000000		100			2nd		16	8	1	16000000		100
3rd		16		11	16000000	2000000	100	100		3rd		20	7	2	20000000	2.3094e+06	100	100
30 m	10^-3	10^-4	10^-5	10^-6						30 m	10^-3	10^-4	10^-5	10^-6
1st		17	10	5	17000000		141.667			1st		3	1	0	3000000		18.75
2nd		18	15	7	18000000		128.571			2nd		4	1	0	4000000		25
3rd		18	15	13	18000000	577350	112.5	127.579		3rd		5	2	0	5000000	1000000	25	22.9167
60 m	10^-3	1	10^-5	10^-6						60 m	10^-3	10^-4	10^-5	10^-6
1st		21	2	10	21000000		175			1st	9	2	1	0	900000		5.625
2nd		21	8	18	21000000		150			2nd	8	2	1	0	800000		5
3rd		21	14	28	21000000	0	131.25	152.083		3rd	10	3	0	0	1000000	100000	5	5.20833
120 m	10^-3	10^-4	10^-5	10^-6						120 m	10^-3	10^-4	10^-5	10^-6
1st		19	11	6	19000000		158.333			1st	7	3	0	0	700000		4.375
2nd		19	20	12	19000000		135.714			2nd	11	2	0	0	1100000		6.875
3rd		20	20	15	20000000	577350	125	139.683		3rd	15	3	0	0	1500000	400000	7.5	6.25
180 m	10^-3	10^-4	10^-5	10^-6						180 m	10^-3	10^-4	10^-5	10^-6
1st		22	11	3	22000000		183.333			1st	6	2	0	0	600000		3.75
2nd		24	12	10	24000000		171.429			2nd	10	1	0	0	1000000		6.25
3rd		24	15	10	24000000	1.1547e+06	150	168.254		3rd	13	2	0	0	1300000	351188	6.5	5.5
ABMYSP-245										ABMYSP-210
0 m	10^-3	10^-4	10^-5	10^-6	Choose	SD	%Survival	AVERAGE		0 m	10^-3	10^-4	10^-5	10^-6	Choose	SD	%Survival	AVERAGE
1st			4	2	40000000		100			1st		14			14000000		100
2nd			6	2	60000000		100			2nd		16			16000000		100
3rd			7	4	70000000	2.85774e+07	100	100		3rd		16			16000000	1.1547e+06	100	100
30 m	10^-3	10^-4	10^-5	10^-6						30 m	10^-3	10^-4	10^-5	10^-6
1st			2	2	20000000		50			1st		3			3000000		21.4286
2nd			6	2	60000000		100			2nd		4			4000000		25
3rd			14	6	140000000	6.1101e+07	200	116.667		3rd		5			5000000	1000000	31.25	25.8929
60 m	10^-3	10^-4	10^-5	1						60 m	10^-3	10^-4	10^-5	10^-6
1st			3	1	30000000		75			1st	2				200000		1.42857
2nd			8	1	80000000		133.333			2nd	3				300000		1.875
3rd			8	0	80000000	2.88675e+07	114.286	107.54		3rd	3				300000	57735	1.875	1.72619
120 m	10^-3	10^-4	10^-5	10^-6						120 m	10^-3	10^-4	10^-5	10^-6
1st			7	3	70000000		175			1st	0				100		0.000714286
2nd			9	4	90000000		150			2nd	2				200000		1.25
3rd			11	4	110000000	20000000	157.143	160.714		3rd	2				200000	115412	1.25	0.833571
180 m	10^-3	10^-4	10^-5	10^-6						180 m	10^-3	10^-4	10^-5	10^-6
1st			17	2	170000000		425			1st	0	0	0	0	100		0.000714286
2nd			17	6	170000000		283.333			2nd	0	0	0	0	100		0.000625
3rd			17	0	170000000	0	242.857	317.063		3rd	1	0	0	0	100000	57677.3	0.625	0.20878
										ABMYH-1033
ABMYSP-419										0 m	10^-3	10^-4	10^-5	10^-6	Choose	SD	%Survival	AVERAGE
0 m	10^-3	10^-4	10^-5	10^-6	10^-7	Choose	%Survival	AVERAGE		1st		13			13000000		100
1st	>	11	6	4	1	11000000	100			2nd		15			15000000		100
2nd	>	10	0	0	0	10000000	100			3rd		19			19000000	3.05505e+06	100	100
3rd	>	16	6	4	1	16000000	100	100		30 m	10^-3	10^-4	10^-5	10^-6
30 m	10^-3	10^-4	10^-5	10^-6	10^-7					1st		12			12000000		92.3077
1st		8	0	0	0	8000000	72.7273			2nd		13			13000000		86.6667
2nd		8	0	0	0	8000000	80			3rd		25			25000000	7.23418e+06	131.579	103.518
3rd		12	0	0	0	12000000	75	75.9091		60 m	10^-3	10^-4	10^-5	10^-6
60 m	10^-3	10^-4	10^-5	10^-6	10^-7					1st			6		60000000		461.538
1st	>	7	6	3	0	7000000	63.6364			2nd			8		80000000		533.333
2nd	>	10	6	3	2	10000000	100			3rd			14		140000000	4.16333e+07	736.842	577.238
3rd	>	9	7	3	2	9000000	56.25	73.2955		120 m	10^-3	10^-4	10^-5	10^-6
120 m	10^-3	10^-4	10^-5	10^-6	10^-7					1st			11		110000000		846.154
1st	>	12	3	2	0	12000000	109.091			2nd			14		140000000		933.333
2nd	>	14	3	1	0	14000000	140			3rd			20		200000000	4.58258e+07	1052.63	944.04
3rd	28	18	3	2	0	18000000	112.5	120.53		180 m	10^-3	23	10^-5	10^-6
180 m	10^-3	10^-4	10^-5	10^-6	10^-7					1st			15		150000000		1153.85
1st	>	14	1	0	0	14000000	127.273			2nd			17		170000000		1133.33
2nd	>	15	0	0	0	15000000	150			3rd			28		280000000	70000000	1473.68	1253.62
3rd	>	16	2	0	0	16000000	100	125.758
									SD
									3.21455e+06
									2.3094e+06
									1.52753e+06
									3.05505e+06
									1000000

## Sheet: TableS5
Thai strain ID		Swarming (mm)		Average		Twitching (mm)		Average
ABAPSP-109	£10	£10	£10	£10	14	14	16	14.6667
ABMYH-1245	£10	£10	£10	£10	9	9	11	9.66667
ABAPSP-55	£10	£10	£10	£10	4	5	7	5.33333
ABAPSP-64	15	11	10	12	10	14	13	12.3333
ABMYSP-101	£10	£10	£10	£10	5	5	5	5
ABMYSP-182	14	17	11	14	<5	<5	<5	<5
ABMYSP-187	14	14	14	14	<5	<5	<5	<5
ABMYH-797	£10	£10	£10	£10	9	11	9	9.66667
AB1039	17	19	21	19	<5	<5	<5	<5
AB1492-09	16	16	16	16	<5	<5	<5	<5
AB3396	13	17	15	15	<5	<5	<5	<5
AB4452-09	£10	£10	£10	£10	<5	<5	<5	<5
AB11	£10	£10	£10	£10	<5	<5	<5	<5
ABJNH-403	£10	£10	£10	£10	10	10	10	10
AB15	16	14	15	15	5	5	4	4.66667
ABAPP-61	13	17	15	15	<5	<5	<5	<5
AB8	15	15	15	15	<5	<5	<5	<5
AB14	17	16	18	17	<5	<5	<5	<5
AB724	14	13	15	14	<5	<5	<5	<5
AB1719-09	15	15	15	15	<5	<5	<5	<5
AB2792	11	£10	£10	£10	11	10	10	10.3333
AB1	14	12	16	14	<5	<5	<5	<5
ABMYSP-444	£10	£10	£10	£10	4	4	6	4.66667
AB6	16	20	18	18	<5	<5	<5	<5
AB7	19	18	15	17.3333	<5	<5	<5	<5
AB9	18	18	18	18	5	5	5	5
ABMYSP-185	£10	£10	£10	£10	5	6	5	5.33333
ABMYSP-216	16	16	16	16	<5	<5	<5	<5
ABMYH-1652	£10	£10	£10	£10	7	4	4	5
ABMYSP-475	18	18	18	18	<5	<5	<5	<5
ABMYSP-477	14	16	15	15	<5	<5	<5	<5
ABMYSP-479	16	15	14	15	<5	<5	<5	<5
ABMYSP-517	£10	£10	£10	£10	<5	<5	<5	<5
ABMASP-366	£10	£10	£10	£10	5	5	5	5
ABMASP-379	£10	£10	£10	£10	16	7	16	13
ABMASP-491	£10	£10	£10	£10	<5	<5	<5	<5
ABAPSP-195	£10	£10	£10	£10	<5	<5	<5	<5
ABAPU-469	10	11	12	11	<5	<5	<5	<5
ABAPU-722	17	15	16	16	<5	<5	<5	<5
ABMYSP-494	16	16	16	16	<5	<5	<5	<5
ABMYSP-6	18	15	15	16	<5	<5	<5	<5
ABMYSP-207	£10	£10	£10	£10	<5	<5	<5	<5
ABMYSP-210	£10	£10	£10	£10	<5	<5	<5	<5
ABMYSP-245	£10	£10	£10	£10	<5	<5	<5	<5
ABMYH-1033	£10	£10	£10	£10	9	10	10	9.66667
	Positive swarming motility showed a zone of >10 mm				Twitching motility scored on Petri plates after staining with crystal violet. Diameter of zone of migration is shown.
					Positive twitching showed zone diameter > 5 mm

## Sheet: TableS4
Thai strain ID	ABMYSP-109	ABMYH-1245	ABAPSP-55	ABAPSP-64	ABMYSP-101	ABMYSP-182	ABMYSP-187	ABMYH-797	AB1039	AB1492-09	AB3396	AB4452-09	AB11	ABJNH-403	AB15	ABAPP-61	AB8	AB14	AB724	AB1719-09	AB2792	AB1	ABMYSP-444	AB6	AB7	AB9	ABMYSP-185	ABMYSP-216	ABMYH-1652	ABMYSSP-475	ABMYSP-477	ABMYSP-479	ABMYMYSP-517	ABMYSP-366	ABMASP-379	ABMASP-491	ABAPSP-195	ABAPU-469	ABAPU-722	ABMYSP-494	ABMYSP-6	ABMYSP-207	ABMYSP-210	ABMYSP-245	ABMYH-1033	ABMYSP-419
	2.75	1.66	1.98	1.67	1.93	1.39	1.01	1.51	0.68	1.61	2.1	0.26	1.11	1.09	1.34	2.13	1.58	1.63	1.68	1.11	1.33	1.66	1.22	1.13	1.75	0.93	1.89	2.12	1.77	2.03	2.08	1.86	1.98	1.04	2.01	1.01	1.85	1.98	1.87	1.05	1.33	1.19	0.18	1.86	1.75	1.7
	2.32	1.25	1.54	1.88	1.37	1.38	1.19	1.03	0.43	1.63	1.23	0.29	0.97	1.47	1.25	1.75	1.86	1.62	1.79	0.7	1.5	1.48	1.96	2.05	2.12	0.46	1.58	2.49	1.18	2.08	1.29	1.48	1.46	1.5	1.56	2	1.33	1.68	1.67	1.71	1.66	1.97	0.56	1.51	1.85	1.05
	2.8	1.03	1.39	1.93	1.47	1.73	1.32	1.09	0.72	1.94	1.96	0.38	0.71	1.85	2.06	2.42	1.65	1.92	1.68	1.07	1.14	1.22	0.83	1.9	1.66	0.94	1.5	2.31	1.78	2.04	1.1	1.99	1.94	1.16	1.65	1.58	1.65	0.75	1.64	1	1.45	2.1	0.85	1.67	0.97	1.9
	2.16	1.1	1.25	1.86	1.25	1.69	1.25	1.49	0.73	1.33	1.12	0.37	1.38	1.23	1.99	2.17	1.53	1.94	1.55	1.14	1.14	1.51	1.26	1.92	0.98	0.74	2.11	2.58	1.95	1.88	1.83	1.89	1.83	2.06	1.57	1.37	1.94	1.3	1.98	1.59	1.23	1.76	0.26	1.91	0.94	1.12
	2.4	1.24	2.02	1.9	2.37	1.76	1.36	1.69	0.77	1.59	1.27	0.5	1.9	1.71	1.15	2.35	1.36	1.44	1.74	1.58	1.6	1.58	0.83	1.36	1.71	0.65	1.7	1.53	1.51	2.02	1.35	1.33	1.85	1.58	2.03	1.13	1.52	1	1.83	0.79	1.3	2.5	0.64	1.81	1.08	2.12
	2.36	1.19	1.53	2.04	1.2	1.29	1.59	1.5	0.52	1.84	1.56	0.53	1.27	1.62	1.72	1.96	2.05	1.22	1.32	1.38	1.45	1.25	0.88	1.8	2.08	0.41	1.81	1.93	1.73	1.56	1.09	1.48	2.03	1.21	1.87	1.53	1.27	0.88	1.51	1.1	1.36	2.61	0.31	1.75	1.23	1.93
	2.32	1.46	1.84	1.21	1.82	1.65	1.37	0.92	0.31	1.95	1.43	0.2	1.4	1.81	1.98	2.86	1.62	1.64	1.81	1.13	1.46	1.39	1.08	1.42	1.22	0.51	1.63	2.21	2.1	2.11	1.2	1.74	1.96	1.67	1.31	2.01	1.65	1.13	1.62	1.79	1.09	1.92	0.34	1.51	0.91	1.08
	3	1.27	1.67	1.7	1.23	1.92	1.35	1.42	0.16	1.61	1.74	0.17	1.1	1.11	1.98	2.1	1.96	1.79	1.59	0.95	1.03	1.69	1.3	1.75	1.08	0.72	1.8	1.93	1.36	1.52	1.4	1.98	1.76	1.92	1.05	1.65	1.37	1.79	1.88	1.54	1.5	1.69	0.31	1.69	1.85	1.37
	2.58	1.48	1.25	1.67	1.33	1.21	1.09	0.94	0.53	1.19	1.53	0.18	1.12	1.62	1.25	1.82	1.7	1.68	1.41	1.19	2.03	1.15	1.12	1.23	1.4	0.8	1.62	2.35	1.28	1.66	1.15	2.08	1.92	2.03	2.12	1.94	1.05	1.59	1.75	1.77	1.15	2.27	0.85	1.97	1.08	1.14
	2.07	1.06	1.69	1.65	1.21	1.43	1.84	1.3	0.72	1.98	2.04	0.21	0.77	1.65	1.34	3	1.4	1.87	1.28	1.31	1.44	1.92	2.06	1.57	1.56	1.29	1.84	2.19	1.49	2.08	1.45	2.1	1.88	1.33	1.85	1.28	2.07	1.69	1.87	1.41	1.21	2.11	0.68	1.8	1.2	1.71
	2.07	1.3	1.48	1.23	1.66	1.53	1.49	1.48	0.45	1.51	1.69	0.17	1.24	1.21	1.25	2.08	1.91	2.06	1.26	1.04	1.73	1.53	1.39	1.22	2.03	0.24	1.99	3.28	1.98	1.17	1.78	1.6	1.96	2.06	1.17	1.22	1.54	1.08	1.6	1.61	1.01	2.34	0.57	2.07	1.01	1.3
	2.36	1.22	1.24	1.51	2.31	1.84	1.74	1.61	0.52	1.3	1.84	0.31	1.25	2.1	2.06	2.52	1.68	1.61	1.51	1.26	1.2	1.9	1.61	1.87	1.7	0.58	1.91	2.08	1.87	1.95	1.61	2.05	2.04	0.97	1.41	1.43	1.56	1.17	1.94	1.97	1.46	1.55	0.84	2.07	1.4	1.96
	2.12	1.39	1.31	1.96	1.75	2	1.4	1.77	0.61	1.44	1.84	0.57	1.12	2.03	1.99	2.49	1.76	1.95	1.75	1.17	1.73	1.39	1.62	1.17	1.61	0.8	1.64	2.76	1.3	1.38	1.56	1.92	1.99	1.17	1.91	1.13	1.96	1.59	1.79	1.75	1.21	1.71	0.36	1.9	0.78	1.32
	2.92	1.13	1.3	1.84	1.45	1.69	1.46	1.75	0.49	1.36	1.59	0.38	1.75	1.69	1.15	2.39	1.7	1.63	1.76	1.21	1.06	1.73	1.31	1.25	2.01	1.02	1.02	2.09	0.91	1.36	1.84	1.57	1.77	1.68	1.91	1.39	1.76	1.63	0.91	1.32	1.39	2.35	0.56	1.5	0.89	1.67
	2.58	1.38	1.31	1.81	1.81	1.97	1.65	1.32	0.81	1.9	1.85	0.45	1.31	1.63	1.72	2.22	1.51	1.94	1.31	1.24	1.76	1.45	1.91	1.06	1.9	1.04	1.5	2.42	1.58	1.62	1.6	1.87	1.86	1.82	1.68	1.15	1.35	1.82	1.61	1.92	1.08	1.93	0.32	0.91	1.19	1.68
	2.29	1.53	1.58	1.71	1.41	1.83	1.61	1.13	1.09	1.33	2.05	0.44	0.98	1.67	1.9	1.5	1.92	1.65	1.65	1.58	1.49	1.35	1.7	1.17	1.62	0.88	1.33	3.3	0.84	1.55	1.89	1.81	2.06	1.72	1.44	1.35	1.84	1.44	1.64	0.89	1.06	1.65	0.79	2.07	1.87	1.12
	2.8	1.07	1.39	2.1	1.26	1.85	1.66	1.89	0.67	1.74	1.04	0.25	1.04	1.75	1.38	2.87	1.49	1.85	1.34	1.46	1.83	1.27	1.28	1.67	1.16	0.87	1.95	3.07	0.81	1.04	1.83	1.91	1.43	1.41	1.91	0.99	1.75	1.31	1.56	1.17	1.48	2.12	0.97	1.23	1.6	2.06
	2.92	1.58	1.75	1.61	1.32	1.59	1.25	1.38	0.92	1.98	1.6	0.3	0.88	1.41	1.54	1.26	1.8	1.63	1.94	1.42	1.6	1.5	1.84	2.03	1.78	0.34	1.51	2.26	1.98	1.63	1.6	1.54	1.88	1.62	2.11	1.45	1.84	1.5	1.77	1.56	1.08	1.38	0.99	1.62	1.3	1.85
	2.58	1.09	1.51	1.52	1.48	1.21	1.16	1.61	0.18	1.79	1.54	0.47	1.72	1.54	2.08	2.39	1.81	1.42	1.76	1.15	1.27	1.61	1.79	2.1	1.36	1.19	2.06	2.55	2.05	1.67	1.8	1.7	1.47	1.55	2.11	1.3	1.98	0.86	2.12	2.07	0.77	2.41	0.56	0.92	1.97	2.11
	2.58	1.05	1.79	2.07	1.54	1.45	1.23	1.66	1.03	1.23	1.68	0.33	1.23	1.59	1.44	2.56	1.41	1.71	1.66	1.28	1.32	2.06	1.07	1.32	2.12	0.94	1.55	2.88	2.02	1.82	1.91	1.63	1.98	1.18	2.08	1.76	2.08	1.12	1.65	1.29	0.7	1.83	1.38	2.08	1.55	1.63
	1.72	1.65	1.76	1.45	1.46	1.77	1.76	1.87	0.71	2.01	1.94	0.25	1.78	1.78	1.7	2.18	1.99	1.91	1.26	1.23	1.53	1.92	1.73	2.03	1.97	0.83	1.89	1.94	1.9	1.42	2.07	2.12	1.4	1.1	1.57	1.77	1.13	1.37	0.83	1.21	1.63	1.78	0.2	1.8	1.41	1.28
	1.56	1.78	1.83	1.4	1.37	1.33	1.24	1.38	0.92	1.97	1.73	0.34	1.74	1.51	1.79	1.85	1.94	1.22	1.4	0.99	1.76	2	1.07	1.77	1.79	0.42	1.8	1.91	1.67	1.9	0.71	2.04	2.12	1.62	1.66	1.57	1.99	0.83	1.57	1.94	1.1	2.55	1.15	1.7	0.96	1.74
	1.8	1.27	1.06	1.75	1.76	1.51	1.65	1.2	0.43	1.58	1.19	0.21	1.61	1.83	1.08	1.89	1.36	1.27	1.72	1.2	1.33	1.67	1.85	1.53	1.9	1.14	1.63	2.68	1.94	1.53	1.66	1.51	1.12	1.64	1.47	1.58	1.55	1.85	1.54	1.13	1.43	2.23	0.21	1.62	0.9	1.67
	1.7	1.31	1.96	1.4	1.74	1.36	1.43	1.41	0.31	1.71	1.59	0.2	1.37	1.1	1.88	1.6	1.61	1.61	1.37	1.17	1.16	1.66	1.54	1.69	1.77	0.99	1.66	2.7	1.39	1.53	1.77	1.63	1.36	1.44	1.02	1.13	1.45	1.85	1.85	1.59	1.19	1.85	0.77	1.99	1.01	1.38
	2.35	1.16	1.73	1.79	2.13	1.31	1.8	1.8	0.91	2.11	2.11	0.25	1.97	1.83	1.61	2.71	1.13	1.8	1.37	0.78	1.84	1.45	1.09	1.7	0.99	1.02	1.39	2.67	1.43	1.83	1.55	1.87	1.65	1.99	2.04	1.84	0.96	1.13	1.26	1.55	1.27	1.32	0.59	1.35	1.32	1.83
	2.89	1.69	2.09	1.68	1.41	1.27	1.21	1.84	0.66	1.74	2.05	0.24	0.92	1.29	1.7	2.39	1.69	1.3	1.9	0.94	1.85	1.54	1.83	1.94	2.1	0.6	1.68	2.42	1.63	2.08	1.84	1.95	1.88	1.49	1.98	1.41	1.76	1.3	1.63	0.89	1.4	1.6	0.64	1.3	1.62	1.55
	1.79	1.19	1.63	1.61	1.56	1.22	1.76	1.48	0.5	1.8	1.38	0.31	1.38	1.87	1.89	2.29	1.62	1.62	1.88	0.82	1.75	1.64	1.47	1.5	1.55	1.09	1.28	2.62	1.6	1.98	1.2	1.89	1.56	1.49	1.36	1.4	1.76	0.93	1.73	0.96	1.22	2.98	0.23	1.49	1.08	1.08
	1.59	1.68	1.7	0.85	2.09	1.72	1.67	1.44	0.71	1.94	1.88	0.23	1.14	1.96	1.41	2.56	1.7	1.89	1.85	1.12	1.91	1.39	0.83	1.6	1.91	0.54	1.79	2.78	1.52	2.04	0.95	1.32	1.95	1.52	1.68	0.79	1.28	1.46	1.51	1.56	1	2.44	0.21	1.36	1.93	1.54
	2.76	1.14	1.34	1.91	1.45	1.77	1.22	1.59	0.74	1.89	1.94	0.22	1.15	1.66	1.25	2.13	1.92	1.95	1.31	0.84	1.44	1.14	1.69	1.5	1.48	0.84	1.47	1.3	1.62	1.11	1.48	1.89	1.89	1.06	1.78	0.87	1.27	0.93	2.09	2	1.6	1.93	0.72	1.65	1	1.89
	2.3	1.57	1.19	1.67	1.85	1.21	1.86	1.33	0.33	1.69	1.5	0.5	1.2	1.73	0.94	1.73	1.74	1.44	1.72	0.97	1.8	1.64	1.43	1.3	2.1	0.19	1.77	2.02	1.03	1.02	1.25	1.64	1.92	1.87	1.65	1.53	1.66	1.19	1.87	1.94	1.28	2.32	0.47	1.13	1.25	1.65
	2.07	1.38	1.5	1.72	1.33	1.25	1.29	1.68	0.33	1.36	1.54	0.45	0.87	1.84	2.09	2.82	1.99	1.16	1.7	0.82	1.07	1.52	1.03	1.57	1.67	0.54	1.72	2.55	1.1	1.72	1.17	1.18	1.88	1.63	1.97	1.8	1.77	1.74	1.74	1.74	1.32	2.45	0.75	1.56	1.17	2.07
	2.64	1.17	1.38	1.69	1.7	1.27	1.24	1.07	0.96	2.01	1.76	0.33	0.93	1.29	0.94	2.42	1.51	1.61	1.64	0.59	1.29	1	0.93	1.71	1.55	0.98	1.52	2.11	2.09	1.58	1.41	1.99	2.06	1.51	1.75	2.04	1.92	1.68	2.12	1.93	1.44	2.23	0.32	2.04	1.5	1.42
	2.36	1.82	1.39	1.86	1.75	1.46	1.49	1.83	1.14	2.09	1.78	0.39	1.54	1.87	0.94	1.24	1.21	1.69	1.22	1.08	1.6	2.11	1.93	1.78	1.2	0.49	1.89	2.06	0.74	1.8	0.85	1.76	1.9	1.09	1.88	1.78	1.67	1.1	1.9	1.03	1.4	2.14	0.25	1.86	1.42	1.37
	2.29	1.55	1.61	2.09	1.83	1.24	1.65	1.65	0.29	1.81	2.02	0.3	1.28	1.87	1.45	3	1.59	2.01	1.25	1.15	1.5	2.1	1.02	1.56	1.93	1.02	1.33	1.93	0.99	1.39	1.35	1.39	1.63	1.61	1.82	0.98	1.8	1.83	1.64	1.89	1.48	2.2	0.45	2	1.68	1.76
	1.87	1.28	1.67	1.72	1.92	1.86	1.15	1.85	0.94	1.98	1.38	0.2	1.06	1.49	1.87	2.87	1.8	2.08	1.52	1.6	1.93	1.15	1.5	1.77	1.75	0.73	1.22	2.95	1.07	1.99	1.73	1.71	1.69	1.53	1.8	0.96	0.87	1.73	1.32	1.61	1.22	2.72	0.4	2.03	1.32	1.34
	1.46	1.45	1.48	1.92	1.73	1.37	1.26	1.5	0.63	1.3	1.39	0.23	0.9	1.79	0.88	2.29	1.78	1.41	1.27	1.69	1.51	1.45	1.08	1.53	1.08	0.61	1.56	2.02	1.01	1.67	1.35	1.31	1.8	1.95	2.04	1.36	2.08	0.9	2.12	1.27	1.38	2	0.25	2.1	1.3	1.55
	3	1.87	1.65	1.72	1.83	1.83	1.49	1.33	1.07	1.68	1.64	0.26	1.14	2.08	0.89	2.11	1.23	2.07	1.6	1.63	1.28	1.27	0.92	1.38	1.38	1.17	1.72	3.22	1.76	1.92	1.48	2.11	1.3	1.8	1.46	1.76	0.86	1.56	1.66	1.88	1.18	2.05	1.12	1.73	1.39	1.42
	2.1	1.56	1.65	1.81	1.37	1.28	1.38	1.35	1.19	1.87	1.85	0.31	1.33	1.97	1.08	2.9	1.73	1.68	1.5	1.45	1.12	1.35	1.97	1.77	1.08	0.6	1.77	2.27	2.1	1.91	1.1	1.78	1.96	1.88	2.05	1.17	1.91	1.3	1.73	1.59	1.02	2.3	0.53	1.07	1.65	1.82
	2.24	1.33	1.56	1.38	1.49	1.24	1.37	1.59	0.42	1.73	1.91	0.29	1.82	1.52	1.08	2.35	1.89	2.02	1.44	1.55	1.36	1.25	1.43	1.54	2	0.15	1.7	2.17	1.29	2.12	1.28	1.3	1.44	1.26	1.95	1.27	1.66	1.18	1.94	1.54	1.41	1.48	1.24	1.24	1.77	1.43
	1.82	1.17	1.68	1.41	2.13	1.44	0.91	1.23	0.62		1.89	0.27	0.91	1.59	1.88	2.68	1.35	1.78	1.42	1.15	1.27	1.66	1.52	1.54	1.07	0.72	1.76	3.35	1.49	2.1	1.34	1.69	2.1	2.05	1.91	1.49	1.85	1.22	1.63	1.12	1.21	2.22	0.57	1.75	1.08	1.26
	2.82	1.78	2.03	1.54	1.54	1.36	1.95	1.25	0.84		2.07	0.15	1.23	1.95	1.61	2.29	1.28	1.44	1.94	1.67	1.64		1.7	1.99	1.49	0.9	1.53	2.67	1.55	1.82	1.45	1.71	1.76	1	1.91	1.82	1.71	1.92	1.02	1.61	1.1	2.4		1.88	2.09	1.84
	2.29	1.51	1.94	1.45	1.58	1.26	1.42	1.87	0.66		1.65	0.3	1.18	1.5	1.15	2.29	1.42	1.27	1.3	0.92	1.29		1.07	1.5	1.82	0.62	1.76	2.09	2.03	2.06	1.28	1.44	1.97	1.47	1.96	1.33	2.04	2.08	1.78	1.99	0.49	1.39		1.05	1.42	1.56
	2.12	1.38	1.48	1.54	2.37	1.44	1	1.35	1.03		2.06	0.53	1.74	1.87	1.88	2.56	1.97		1.21	0.72	1.47		1.17	1.04	1.81	0.57	2.09	3.22	1.6	1.7	1.22	1.82	1.56	2.06	1.45	0.94	2.12	1.85	1.75	1.48	1.33	1.4		1.23	1.16	1.27
	1.95	1.54	1.53	0.79	1.52	1.8	1.67	1.14	0.62		1.8	0.23	2.03	1.66	1.08	1.89	1.55		1.45	0.96	1.45		1.86	1.1	1.32	1.19	1.66	2.27	1.39	1.75		2.09	1.91	2.09	2.08	1.37	1.45	1.97	2.02	1.7	0.8	1.68		2.07	1.51	1.72
				1.86							1.8																		1.78					1.89	1.66	1.81		1.35	2.05	1.05	1.39
				1.96							1.79																		1.5					2.12		1.49		1.3	1.64	1.9	1.33
											2.1																							1.03		1.55				1.12
											1.2
											1.94
Number of values	44	44	44	46	44	44	44	44	44	39	50	44	44	44	44	44	44	42	44	44	44	40	44	44	44	44	44	44	46	44	43	44	44	47	45	47	44	46	46	47	46	44	40	44	44	44
Minimum	1.46	1.03	1.06	0.79	1.2	1.21	0.91	0.92	0.16	1.19	1.04	0.15	0.71	1.09	0.88	1.24	1.13	1.16	1.21	0.59	1.03	1	0.83	1.04	0.98	0.15	1.02	1.3	0.74	1.02	0.71	1.18	1.12	0.97	1.02	0.79	0.86	0.75	0.83	0.79	0.49	1.19	0.18	0.91	0.78	1.05
25% Percentile	2.07	1.175	1.39	1.518	1.38	1.283	1.24	1.305	0.46	1.51	1.523	0.23	1.045	1.503	1.15	1.99	1.495	1.44	1.325	0.9625	1.283	1.35	1.073	1.33	1.365	0.5475	1.523	2.083	1.288	1.535	1.22	1.548	1.635	1.26	1.565	1.17	1.39	1.128	1.608	1.13	1.098	1.695	0.3125	1.393	1.08	1.325
Median	2.31	1.355	1.57	1.705	1.55	1.445	1.39	1.48	0.665	1.74	1.75	0.295	1.23	1.665	1.495	2.29	1.685	1.665	1.535	1.15	1.465	1.515	1.41	1.565	1.685	0.77	1.69	2.33	1.565	1.775	1.45	1.77	1.88	1.58	1.82	1.41	1.69	1.36	1.73	1.56	1.275	2.075	0.56	1.715	1.31	1.595
75% Percentile	2.625	1.558	1.745	1.865	1.828	1.768	1.65	1.675	0.8925	1.94	1.94	0.38	1.505	1.848	1.88	2.56	1.848	1.913	1.735	1.363	1.73	1.668	1.723	1.778	1.908	0.9875	1.808	2.695	1.878	2.013	1.77	1.943	1.96	1.88	1.975	1.76	1.895	1.733	1.873	1.79	1.403	2.335	0.785	1.955	1.615	1.828
Maximum	3	1.87	2.09	2.1	2.37	2	1.95	1.89	1.19	2.11	2.11	0.57	2.03	2.1	2.09	3	2.05	2.08	1.94	1.69	2.03	2.11	2.06	2.1	2.12	1.29	2.11	3.35	2.1	2.12	2.08	2.12	2.12	2.12	2.12	2.04	2.12	2.08	2.12	2.07	1.66	2.98	1.38	2.1	2.09	2.12
Mean	2.306	1.38	1.583	1.67	1.638	1.522	1.429	1.466	0.6659	1.706	1.695	0.3125	1.283	1.651	1.515	2.27	1.652	1.677	1.546	1.168	1.483	1.539	1.403	1.576	1.626	0.7568	1.671	2.415	1.537	1.73	1.462	1.743	1.792	1.572	1.748	1.436	1.634	1.41	1.699	1.5	1.242	2.024	0.5848	1.656	1.349	1.574
Std. Deviation	0.4182	0.2336	0.2482	0.285	0.3157	0.2491	0.2536	0.2661	0.2641	0.2623	0.2941	0.1108	0.3395	0.2629	0.3892	0.4383	0.2373	0.2584	0.2222	0.2774	0.2636	0.2786	0.3703	0.2954	0.3459	0.2849	0.2332	0.4741	0.3841	0.3049	0.3227	0.256	0.2419	0.3443	0.2899	0.3236	0.336	0.3636	0.2866	0.3614	0.2402	0.4122	0.3139	0.3431	0.3412	0.3052
Std. Error of Mean	0.06305	0.03522	0.03741	0.04202	0.0476	0.03755	0.03823	0.04011	0.03981	0.042	0.04159	0.01671	0.05118	0.03963	0.05867	0.06607	0.03578	0.03988	0.03349	0.04182	0.03974	0.04405	0.05583	0.04454	0.05215	0.04295	0.03516	0.07148	0.05663	0.04597	0.04921	0.03859	0.03646	0.05022	0.04321	0.0472	0.05066	0.05361	0.04225	0.05272	0.03541	0.06214	0.04964	0.05173	0.05143	0.04601
Lower 95% CI of mean	2.179	1.309	1.508	1.586	1.542	1.447	1.352	1.385	0.5856	1.621	1.611	0.2788	1.18	1.571	1.396	2.137	1.58	1.596	1.479	1.084	1.403	1.45	1.29	1.486	1.521	0.6702	1.6	2.271	1.423	1.638	1.362	1.665	1.719	1.471	1.661	1.341	1.531	1.302	1.614	1.394	1.171	1.899	0.4843	1.551	1.245	1.481
Upper 95% CI of mean	2.433	1.451	1.659	1.755	1.734	1.598	1.506	1.547	0.7462	1.791	1.778	0.3462	1.387	1.731	1.633	2.403	1.724	1.757	1.614	1.253	1.563	1.628	1.515	1.665	1.732	0.8434	1.742	2.559	1.651	1.823	1.561	1.82	1.866	1.673	1.835	1.531	1.736	1.518	1.784	1.607	1.313	2.149	0.6852	1.76	1.453	1.667
Sum	101.5	60.71	69.66	76.84	72.08	66.98	62.89	64.52	29.3	66.52	84.73	13.75	56.47	72.63	66.64	99.88	72.7	70.43	68.03	51.41	65.26	61.55	61.72	69.33	71.56	33.3	73.53	106.3	70.71	76.14	62.85	76.67	78.86	73.87	78.65	67.48	71.88	64.86	78.15	70.52	57.14	89.05	23.39	72.85	59.36	69.26

## Sheet: TableS2
Strain/sanger_ID	Year	Country	Publication	ST_Pasteur_MLST	p4ABAYE0001_p4ABAYE_CU459139	pRCH51_3_KY216144	pXBB1_2_CP010353	RepApAB49_pAB49_L77992	repAci3_p203_GU978997	repA_AB_pABIR_EU294228	pA297_3_parA_KU744946	pAB3_CP012005	pRAY__unknownorf_JQ904627	repAci6_pA85_3_KJ493819	p3ABAYE0002_p3ABAYE_CU459140	pD46_4_CP012956	repAci5_p537_GU978999	pABTJ2_NC_020524	repAci4_p844_GU978998	repAci7_p736_GU978996	p1ABAYE0001_p1ABAYE_CU459137	repAci1_pAbG7_1_KJ586856	repAci2_pABVA01_FM210331	repAciX_pACICU1_CP000864	repM_Aci9_pMAC_AY541809	pNaval81_26_NZ_AFDB02000003.1	Aac3-Iia	Aac3-I	AacAad	AadA	AadB	Aph3-Ia	Aph4-Ia	AphA6	ArmA	RmtB	StrA	StrB	BlaA1	BlaA2	CARB	Imp-1	Mbl	NDM-1	OXA-237	OXA-23	OXA-24	OXA-48	OXA-51
8290_3#10	2009	Vietnam	Schultz MB et al. Microb Genom 2016;2(3):e000050	23	no	no	no	no	no	no	yes	no	no	no	no	no	no	no	no	no	no	no	no	no	no	no	0	0	0	0	0	0	0	1	0	0	1	1	1	1	0	0	1	0	0	1	0	0	1
8290_3#11	2009	Vietnam	Schultz MB et al. Microb Genom 2016;2(3):e000050	109	no	no	no	no	yes	no	no	no	no	no	yes	no	no	no	no	no	no	no	no	no	no	no	0	0	1	1	1	0	0	0	0	1	1	1	1	1	0	0	1	0	0	1	0	0	1
8290_3#12	2009	Vietnam	Schultz MB et al. Microb Genom 2016;2(3):e000050	23	no	no	no	no	no	no	yes	no	no	no	no	no	no	no	no	no	no	no	no	no	no	no	0	0	0	0	0	0	0	1	0	0	1	1	1	1	0	0	1	0	0	1	0	0	1
8290_3#13	2009	Vietnam	Schultz MB et al. Microb Genom 2016;2(3):e000050	2	no	no	no	no	no	no	no	no	no	no	no	no	no	no	no	no	no	no	no	no	yes	no	0	1	1	0	0	1	0	0	1	0	1	1	1	1	0	0	1	0	0	1	0	0	1
8290_3#15	2010	Vietnam	Schultz MB et al. Microb Genom 2016;2(3):e000050	2	no	no	no	no	no	no	no	no	no	no	no	no	no	no	no	no	no	no	no	no	yes	no	1	1	1	1	0	1	0	1	1	0	1	1	1	1	0	0	1	0	0	1	0	0	1
8290_3#20	2010	Vietnam	Schultz MB et al. Microb Genom 2016;2(3):e000050	570	no	no	no	no	no	no	no	no	no	no	no	no	no	no	no	no	no	no	no	no	yes	no	0	0	1	1	0	1	0	0	1	0	0	0	1	1	0	0	1	0	0	1	0	0	1
8290_3#22	2010	Vietnam	Schultz MB et al. Microb Genom 2016;2(3):e000050	570	no	no	no	no	no	no	no	no	no	no	no	no	no	no	no	no	no	no	no	no	yes	no	0	0	1	1	0	1	0	0	1	0	0	0	1	1	0	0	1	0	0	1	0	0	1
8290_3#23	2010	Vietnam	Schultz MB et al. Microb Genom 2016;2(3):e000050	570	no	no	no	no	no	no	no	no	no	no	no	no	no	no	no	no	no	no	no	no	yes	no	0	0	1	1	0	1	0	0	1	0	0	0	1	1	0	0	1	0	0	1	0	0	1
8290_3#24	2010	Vietnam	Schultz MB et al. Microb Genom 2016;2(3):e000050	570	no	no	no	no	no	no	no	no	no	no	no	no	no	no	no	no	no	no	no	no	yes	no	0	0	1	1	0	1	0	0	1	0	0	0	1	1	0	0	1	0	0	1	0	0	1
8290_3#25	2010	Vietnam	Schultz MB et al. Microb Genom 2016;2(3):e000050	570	no	no	no	no	no	no	no	no	no	no	no	no	no	no	no	no	no	no	no	no	yes	no	0	0	1	1	0	1	0	0	1	0	0	0	1	1	0	0	1	0	0	1	0	0	1
8290_3#26	2010	Vietnam	Schultz MB et al. Microb Genom 2016;2(3):e000050	570	no	no	no	no	no	no	no	no	no	no	no	no	no	no	no	no	no	no	no	no	yes	no	0	0	1	1	0	1	0	0	1	0	0	0	1	1	0	0	1	0	0	1	0	0	1
8290_3#28	2010	Vietnam	Schultz MB et al. Microb Genom 2016;2(3):e000050	570	no	no	no	no	no	no	no	no	no	no	no	no	no	no	no	no	no	no	no	no	yes	no	0	1	1	1	0	1	0	0	1	0	0	0	1	1	0	0	1	0	0	1	0	0	1
8290_3#30	2010	Vietnam	Schultz MB et al. Microb Genom 2016;2(3):e000050	570	no	no	no	no	no	no	no	no	no	no	no	no	no	no	no	no	no	no	no	no	yes	no	0	0	1	1	0	1	0	0	1	0	0	0	1	1	0	0	1	0	0	1	0	0	1
8290_3#31	2010	Vietnam	Schultz MB et al. Microb Genom 2016;2(3):e000050	755	no	no	no	no	yes	no	no	no	no	no	no	no	no	no	no	no	no	yes	no	no	no	no	0	0	0	0	0	0	0	0	0	0	0	0	1	1	0	0	1	0	0	0	1	0	1
8290_3#32	2010	Vietnam	Schultz MB et al. Microb Genom 2016;2(3):e000050	108	no	no	no	no	no	no	no	no	no	no	no	no	no	no	no	no	no	no	no	no	no	no	0	0	1	0	0	0	0	1	0	0	0	0	1	1	0	0	1	1	0	0	0	0	1
8290_3#33	2010	Vietnam	Schultz MB et al. Microb Genom 2016;2(3):e000050	23	no	no	no	no	no	no	yes	no	no	no	no	no	no	no	no	no	no	no	no	no	no	no	0	0	1	1	0	1	0	1	1	0	1	1	1	1	0	0	1	0	0	1	0	0	1
8290_3#34	2010	Vietnam	Schultz MB et al. Microb Genom 2016;2(3):e000050	570	no	no	no	no	no	no	no	no	no	no	no	no	no	no	no	no	no	no	no	no	yes	no	0	0	1	1	0	1	0	0	1	0	0	0	1	1	0	0	1	0	0	1	0	0	1
8290_3#36	2010	Vietnam	Schultz MB et al. Microb Genom 2016;2(3):e000050	52	no	no	no	no	yes	no	no	no	no	yes	no	no	no	no	no	no	no	no	yes	no	no	no	0	0	0	0	0	0	0	1	0	0	1	1	1	1	0	0	1	0	0	1	0	0	1
8290_3#37	2010	Vietnam	Schultz MB et al. Microb Genom 2016;2(3):e000050	52	no	no	no	no	no	no	no	no	no	no	no	no	no	no	no	no	no	no	no	no	no	no	0	0	0	1	1	0	0	1	0	1	0	0	1	1	0	1	1	0	0	0	0	0	1
8290_3#38	2010	Vietnam	Schultz MB et al. Microb Genom 2016;2(3):e000050	2	no	no	no	no	no	no	no	no	no	no	no	no	no	no	no	no	no	no	no	no	yes	no	0	1	1	1	0	1	0	0	1	0	1	1	1	1	0	0	1	0	0	1	0	0	1
8290_3#39	2010	Vietnam	Schultz MB et al. Microb Genom 2016;2(3):e000050	52	no	no	no	no	no	no	no	no	no	no	no	no	no	no	no	no	no	no	no	no	no	no	0	0	0	1	1	0	0	1	0	1	0	0	1	1	0	1	1	0	0	0	0	0	1
8290_3#4	2009	Vietnam	Schultz MB et al. Microb Genom 2016;2(3):e000050	2	no	no	no	no	no	no	no	no	no	no	no	no	no	no	no	no	no	no	no	no	yes	no	0	1	1	1	0	1	0	0	1	0	1	1	1	1	0	0	1	0	0	1	0	0	1
8290_3#40	2010	Vietnam	Schultz MB et al. Microb Genom 2016;2(3):e000050	2	no	no	no	no	no	no	no	no	no	no	no	no	no	no	no	no	no	no	no	no	yes	no	0	1	1	1	0	1	0	0	1	0	1	1	1	1	0	0	1	0	0	1	0	0	1
8290_3#41	2010	Vietnam	Schultz MB et al. Microb Genom 2016;2(3):e000050	570	no	no	no	no	no	no	no	no	no	no	no	no	no	no	no	no	no	no	no	no	yes	no	0	0	1	1	0	1	0	0	1	0	0	0	1	1	0	0	1	0	0	1	0	0	1
8290_3#42	2010	Vietnam	Schultz MB et al. Microb Genom 2016;2(3):e000050	2	no	no	no	no	no	no	no	no	no	no	no	no	no	no	no	no	no	no	no	no	yes	no	0	1	1	1	0	1	0	0	1	0	1	1	1	1	0	0	1	0	0	1	0	0	1
8290_3#44	2010	Vietnam	Schultz MB et al. Microb Genom 2016;2(3):e000050	2	no	no	no	no	no	no	no	no	no	no	no	no	no	no	no	no	no	no	no	no	yes	no	0	1	1	1	0	1	0	0	1	0	1	1	1	1	0	0	1	0	0	1	0	0	1
8290_3#46	2010	Vietnam	Schultz MB et al. Microb Genom 2016;2(3):e000050	570	no	no	no	no	no	no	no	no	no	no	no	no	no	no	no	no	no	no	no	no	yes	no	0	0	1	1	0	1	0	0	1	0	0	0	1	1	0	0	1	0	0	1	0	0	1
8290_3#47	2010	Vietnam	Schultz MB et al. Microb Genom 2016;2(3):e000050	2	no	no	no	no	no	no	no	no	no	no	no	no	no	no	no	no	no	no	no	no	yes	no	0	1	1	1	0	1	0	0	1	0	1	1	1	1	0	0	1	0	0	1	0	0	1
8290_3#49	2011	Vietnam	Schultz MB et al. Microb Genom 2016;2(3):e000050	570	no	no	no	no	no	no	no	no	no	no	no	no	no	no	no	no	no	no	no	no	yes	no	0	0	1	1	0	1	0	0	1	0	0	0	1	1	0	0	1	0	0	1	0	0	1
8290_3#5	2009	Vietnam	Schultz MB et al. Microb Genom 2016;2(3):e000050	2	no	no	no	no	no	no	no	no	no	no	no	no	no	no	no	no	no	no	no	no	no	no	0	0	1	1	0	1	0	0	1	0	1	1	1	1	0	0	1	0	0	1	0	0	1
8290_3#51	2011	Vietnam	Schultz MB et al. Microb Genom 2016;2(3):e000050	570	no	no	no	no	no	no	no	no	no	no	no	no	no	no	no	no	no	no	no	no	yes	no	0	0	1	1	0	1	0	0	1	0	0	0	1	1	0	0	1	0	0	1	0	0	1
8290_3#52	2011	Vietnam	Schultz MB et al. Microb Genom 2016;2(3):e000050	570	no	no	no	no	no	no	no	no	no	no	no	no	no	no	no	no	no	no	no	no	yes	no	0	0	1	1	0	1	0	0	1	0	0	0	1	1	0	0	1	0	0	1	0	0	1
8290_3#54	2011	Vietnam	Schultz MB et al. Microb Genom 2016;2(3):e000050	16	no	no	no	no	no	no	no	no	no	no	yes	no	no	yes	no	no	no	no	no	no	no	no	1	0	0	1	1	0	0	0	0	0	0	0	1	1	0	0	1	1	0	0	0	0	1
8290_3#55	2011	Vietnam	Schultz MB et al. Microb Genom 2016;2(3):e000050	2	no	no	no	no	no	no	no	no	no	no	no	no	no	no	no	no	no	no	no	no	yes	no	0	0	1	1	0	1	0	0	1	0	0	0	1	1	0	0	1	0	0	1	0	0	1
8290_3#56	2011	Vietnam	Schultz MB et al. Microb Genom 2016;2(3):e000050	570	no	no	no	no	no	no	no	no	no	no	no	no	no	no	no	no	no	no	no	no	yes	no	0	0	1	1	0	1	0	0	1	0	0	0	1	1	0	0	1	0	0	1	0	0	1
8290_3#57	2011	Vietnam	Schultz MB et al. Microb Genom 2016;2(3):e000050	10	no	no	no	no	yes	no	no	no	no	no	no	no	no	no	no	no	no	no	no	no	no	no	0	0	0	0	0	0	0	0	0	0	0	0	1	1	0	0	1	0	0	0	0	0	1
8290_3#59	2011	Vietnam	Schultz MB et al. Microb Genom 2016;2(3):e000050	2	no	no	no	no	no	no	no	no	no	no	no	no	no	no	no	no	no	no	no	no	yes	no	0	0	1	1	0	1	0	0	1	0	0	0	1	1	0	0	1	0	0	1	0	0	1
8290_3#60	2011	Vietnam	Schultz MB et al. Microb Genom 2016;2(3):e000050	16	no	no	no	no	no	no	no	no	no	no	yes	no	no	yes	no	no	no	no	no	no	no	no	1	0	0	1	1	0	0	0	0	0	0	0	0	1	0	0	1	0	0	0	0	0	1
8290_3#61	2011	Vietnam	Schultz MB et al. Microb Genom 2016;2(3):e000050	16	no	no	no	no	no	no	no	no	no	no	yes	no	no	yes	no	no	no	no	no	no	no	no	1	0	0	1	1	0	0	0	0	0	0	0	1	1	0	0	1	0	0	0	0	0	1
8290_3#62	2011	Vietnam	Schultz MB et al. Microb Genom 2016;2(3):e000050	2	no	no	no	no	no	no	no	no	no	no	no	no	no	no	no	no	no	no	no	no	yes	no	0	0	1	1	0	1	0	0	1	0	0	0	1	1	0	0	1	0	0	1	0	0	1
8290_3#63	2011	Vietnam	Schultz MB et al. Microb Genom 2016;2(3):e000050	2	no	no	no	no	no	no	no	no	yes	no	no	no	no	no	no	no	no	no	no	no	yes	no	0	1	1	1	1	1	0	0	1	0	1	1	1	1	0	0	1	0	0	1	0	0	1
8290_3#64	2011	Vietnam	Schultz MB et al. Microb Genom 2016;2(3):e000050	2	no	no	no	no	no	no	no	no	no	no	no	no	no	no	no	no	no	no	no	no	yes	no	0	1	1	1	0	1	0	0	1	0	1	1	1	1	0	0	1	0	0	1	0	0	1
8290_3#65	2011	Vietnam	Schultz MB et al. Microb Genom 2016;2(3):e000050	2	no	no	no	no	no	no	no	no	no	no	no	no	no	no	no	no	no	no	no	no	yes	no	0	0	1	1	0	1	0	0	1	0	0	0	1	1	0	0	1	0	0	1	0	0	1
8290_3#66	2011	Vietnam	Schultz MB et al. Microb Genom 2016;2(3):e000050	142	no	no	no	no	yes	no	no	no	no	no	no	no	no	no	no	no	no	no	no	no	no	no	0	0	0	0	0	0	0	0	0	0	0	0	0	1	0	0	1	0	0	0	0	0	1
8290_3#67	2011	Vietnam	Schultz MB et al. Microb Genom 2016;2(3):e000050	452*	no	no	no	no	no	no	no	no	no	no	no	no	no	yes	no	no	no	no	no	no	no	no	0	0	0	0	0	0	0	0	0	0	0	0	1	1	0	0	1	0	0	0	0	0	1
8290_3#68	2011	Vietnam	Schultz MB et al. Microb Genom 2016;2(3):e000050	2	no	no	no	no	no	no	no	no	no	no	no	no	no	no	no	no	no	no	no	no	yes	no	0	1	0	1	0	1	0	0	0	0	1	1	1	1	0	0	1	0	0	1	0	0	1
8290_3#69	2011	Vietnam	Schultz MB et al. Microb Genom 2016;2(3):e000050	2	no	no	no	no	no	no	no	no	no	yes	no	no	no	no	no	no	no	no	no	no	yes	no	0	0	1	1	0	1	0	1	1	0	1	1	1	1	0	0	1	0	0	1	0	0	1
8290_3#7	2009	Vietnam	Schultz MB et al. Microb Genom 2016;2(3):e000050	2	no	no	yes	no	no	no	no	no	no	no	no	no	no	no	no	no	no	no	no	no	yes	no	0	1	1	1	0	1	0	0	1	0	1	1	1	1	0	0	1	0	0	1	0	0	1
8290_3#70	2011	Vietnam	Schultz MB et al. Microb Genom 2016;2(3):e000050	2	no	no	no	no	no	no	no	no	no	no	no	no	no	no	no	no	no	no	no	no	yes	no	0	0	1	1	0	1	0	0	1	0	0	0	1	1	0	0	1	0	0	1	0	0	1
8290_3#71	2011	Vietnam	Schultz MB et al. Microb Genom 2016;2(3):e000050	756	no	no	no	no	no	no	no	no	no	no	yes	no	no	no	no	no	no	no	no	no	no	no	0	0	1	0	0	0	0	1	0	0	0	0	0	1	0	1	1	1	0	0	0	0	1
8290_3#72	2011	Vietnam	Schultz MB et al. Microb Genom 2016;2(3):e000050	575?	no	no	no	no	no	no	yes	no	yes	no	no	no	no	no	no	no	no	no	no	no	no	no	0	0	0	0	1	0	0	1	0	0	1	1	1	1	0	0	1	0	0	1	0	0	1
8290_3#74	2011	Vietnam	Schultz MB et al. Microb Genom 2016;2(3):e000050	2	no	no	no	no	no	no	no	no	no	no	no	no	no	no	no	no	no	no	no	no	yes	no	0	0	1	1	0	1	0	0	1	0	0	0	1	0	0	0	1	0	0	1	0	0	1
8290_3#78	2011	Vietnam	Schultz MB et al. Microb Genom 2016;2(3):e000050	571	no	no	no	no	no	no	no	no	no	no	no	no	no	no	no	no	no	no	no	no	yes	no	0	0	0	1	0	0	0	0	1	0	0	0	1	1	0	0	1	0	0	1	0	0	1
8290_3#8	2009	Vietnam	Schultz MB et al. Microb Genom 2016;2(3):e000050	2	no	no	no	no	no	no	no	no	no	no	no	no	no	no	no	no	no	no	no	no	yes	no	0	1	0	0	0	1	0	0	1	0	1	1	1	1	0	0	1	0	0	1	0	0	1
8290_3#80	2011	Vietnam	Schultz MB et al. Microb Genom 2016;2(3):e000050	2	no	no	no	yes	no	no	no	no	no	no	no	no	no	no	no	no	no	no	no	no	yes	no	0	0	1	1	0	1	0	0	1	0	1	1	1	1	0	0	1	0	0	1	0	0	1
8290_3#81	2011	Vietnam	Schultz MB et al. Microb Genom 2016;2(3):e000050	2	no	no	no	yes	no	no	no	no	no	no	no	no	no	no	no	no	no	no	no	no	yes	no	0	0	1	1	0	1	0	0	1	0	1	1	1	1	0	0	1	0	0	1	0	0	1
8290_3#82	2011	Vietnam	Schultz MB et al. Microb Genom 2016;2(3):e000050	754	no	no	no	no	no	no	no	no	no	no	no	no	no	yes	no	no	no	no	no	no	no	no	0	0	0	0	0	0	0	0	0	0	0	0	1	1	0	0	1	0	0	0	0	0	1
8290_3#83	2011	Vietnam	Schultz MB et al. Microb Genom 2016;2(3):e000050	2	no	no	no	no	no	no	no	no	no	no	no	no	no	no	no	no	no	no	no	no	yes	no	0	0	1	1	0	1	0	0	1	0	1	1	1	1	0	0	1	0	0	1	0	0	1
8290_3#84	2011	Vietnam	Schultz MB et al. Microb Genom 2016;2(3):e000050	570	no	no	no	no	no	no	no	no	no	yes	no	no	no	no	no	no	no	no	no	no	yes	no	0	1	0	1	0	1	0	0	1	0	0	0	1	1	0	0	1	0	0	1	0	0	1
8290_3#85	2011	Vietnam	Schultz MB et al. Microb Genom 2016;2(3):e000050	571	no	no	no	no	no	no	no	no	no	no	no	no	no	no	no	no	no	no	no	no	yes	no	0	0	0	1	0	0	0	0	1	0	0	0	1	1	0	0	1	0	0	1	0	0	1
8290_3#86	2011	Vietnam	Schultz MB et al. Microb Genom 2016;2(3):e000050	571	no	no	no	no	no	no	no	no	no	no	no	no	no	no	no	no	no	no	no	no	yes	no	0	0	0	1	0	0	0	0	1	0	0	1	1	1	0	0	1	0	0	1	0	0	1
8290_3#88	2012	Vietnam	Schultz MB et al. Microb Genom 2016;2(3):e000050	2	no	no	no	no	no	no	no	no	no	no	no	no	no	no	no	no	no	no	no	no	yes	no	0	0	1	1	0	1	0	0	1	0	1	1	1	1	0	0	1	0	0	1	0	0	1
8290_3#89	2012	Vietnam	Schultz MB et al. Microb Genom 2016;2(3):e000050	2	no	no	no	no	no	no	no	no	no	no	no	no	no	no	no	no	no	no	no	no	yes	no	0	0	1	1	0	1	0	0	1	0	1	1	1	1	0	0	1	0	0	1	0	0	1
8290_3#9	2009	Vietnam	Schultz MB et al. Microb Genom 2016;2(3):e000050	23	no	no	no	no	no	no	yes	no	no	no	no	no	no	no	no	no	no	no	no	no	no	no	0	0	0	0	0	0	0	1	0	0	1	1	1	1	0	0	1	0	0	1	0	0	1
8290_3#90	2012	Vietnam	Schultz MB et al. Microb Genom 2016;2(3):e000050	2	no	no	no	no	no	no	no	no	no	no	no	no	no	no	no	no	no	no	no	no	yes	no	0	0	1	1	0	1	0	0	1	0	1	1	1	1	0	0	1	0	0	1	0	0	1
8290_3#91	2012	Vietnam	Schultz MB et al. Microb Genom 2016;2(3):e000050	2	no	no	no	no	no	no	no	no	no	no	no	no	no	no	no	no	no	no	no	no	yes	no	0	0	1	1	0	1	0	0	1	0	1	1	1	1	0	0	1	0	0	1	0	0	1
8290_3#92	2007	Vietnam	Schultz MB et al. Microb Genom 2016;2(3):e000050	1	no	no	no	yes	no	no	no	no	no	yes	no	no	no	no	no	no	no	yes	no	no	no	no	0	1	0	1	0	0	0	1	0	0	0	0	1	1	0	0	1	0	0	1	0	0	1
8290_3#93	2007	Vietnam	Schultz MB et al. Microb Genom 2016;2(3):e000050	1	no	no	no	yes	no	no	no	no	no	yes	no	no	no	no	no	no	no	yes	no	no	no	no	0	1	0	1	0	0	0	1	0	0	0	0	1	1	0	0	1	0	0	1	0	0	1
8290_3#94	2003	Vietnam	Schultz MB et al. Microb Genom 2016;2(3):e000050	686	no	no	no	no	no	no	yes	no	yes	no	no	no	no	no	no	no	no	no	no	no	no	no	0	0	0	0	1	0	0	1	0	0	1	1	1	1	0	0	1	0	0	0	0	0	1
8290_3#95	2003	Vietnam	Schultz MB et al. Microb Genom 2016;2(3):e000050	10	no	no	no	no	yes	no	no	no	no	no	no	no	no	no	no	no	no	no	no	no	no	no	0	0	0	0	0	0	0	0	0	0	1	1	1	1	0	0	1	0	0	0	0	0	1
8290_3#96	2003	Vietnam	Schultz MB et al. Microb Genom 2016;2(3):e000050	23	no	no	no	no	no	no	no	no	no	no	no	no	no	no	no	no	no	no	no	no	no	no	1	0	1	0	0	1	0	0	0	0	1	1	1	1	1	0	1	0	0	0	0	0	1
8346_4#1	2004	Vietnam	Schultz MB et al. Microb Genom 2016;2(3):e000050	109	no	yes	no	no	yes	no	yes	no	yes	no	no	no	no	no	no	no	no	no	no	no	no	no	0	0	0	1	1	0	0	1	0	0	1	1	1	1	0	0	1	0	0	0	0	0	1
8346_4#10	2003	Vietnam	Schultz MB et al. Microb Genom 2016;2(3):e000050	25	no	no	no	no	no	no	yes	no	no	no	no	no	no	no	no	no	no	no	no	no	no	no	0	0	0	0	0	0	0	1	0	0	1	1	1	1	0	0	1	0	0	0	0	0	1
8346_4#11	2003	Vietnam	Schultz MB et al. Microb Genom 2016;2(3):e000050	375	no	no	no	no	no	no	no	no	no	no	no	no	no	no	no	no	no	no	no	no	no	no	0	0	0	0	0	0	0	0	0	0	0	0	1	1	0	0	1	0	0	0	0	0	1
8346_4#18	2005	Vietnam	Schultz MB et al. Microb Genom 2016;2(3):e000050	2	no	no	no	no	yes	no	no	no	yes	yes	no	no	no	no	no	no	no	no	no	no	yes	no	0	0	1	1	1	1	0	0	1	0	1	1	1	1	0	0	1	0	0	0	0	0	1
8346_4#19	2005	Vietnam	Schultz MB et al. Microb Genom 2016;2(3):e000050	575	no	no	no	no	yes	no	yes	no	no	yes	no	no	no	yes	no	no	no	no	no	no	no	no	0	0	0	0	0	1	1	1	0	0	1	1	1	1	0	0	1	0	0	0	0	0	1
8346_4#2	2003	Vietnam	Schultz MB et al. Microb Genom 2016;2(3):e000050	10	no	no	no	no	yes	no	no	no	yes	yes	no	no	no	no	no	no	no	no	no	no	no	no	0	0	0	0	1	0	0	0	0	0	1	1	1	1	0	0	1	0	0	0	0	0	1
8346_4#20	2007	Vietnam	Schultz MB et al. Microb Genom 2016;2(3):e000050	2	no	no	no	no	no	no	no	no	no	no	no	no	no	no	no	no	no	no	no	no	yes	no	0	1	1	1	0	1	0	0	1	0	1	1	1	1	0	0	1	0	0	0	0	0	1
8346_4#26	2004	Vietnam	Schultz MB et al. Microb Genom 2016;2(3):e000050	686	no	no	no	no	no	no	yes	no	yes	no	no	no	no	no	no	no	no	no	no	no	no	no	0	0	0	0	1	0	0	1	0	0	1	1	1	1	0	0	1	0	0	0	0	0	1
8346_4#27	2004	Vietnam	Schultz MB et al. Microb Genom 2016;2(3):e000050	686	no	no	no	no	no	no	yes	no	yes	no	no	no	no	no	no	no	no	no	no	no	no	no	0	0	0	0	1	0	0	1	0	0	1	1	1	1	0	0	1	0	0	0	0	0	1
8346_4#28	2004	Vietnam	Schultz MB et al. Microb Genom 2016;2(3):e000050	686	no	no	no	no	no	no	yes	no	yes	no	no	no	no	no	no	no	no	no	no	no	no	no	0	0	0	0	1	0	0	1	0	0	1	1	1	1	0	0	1	0	0	0	0	0	1
8346_4#29	2004	Vietnam	Schultz MB et al. Microb Genom 2016;2(3):e000050	686	no	no	no	no	no	no	yes	no	yes	no	no	no	no	no	no	no	no	no	no	no	no	no	0	0	0	0	1	0	0	1	0	0	1	1	1	1	0	0	1	0	0	0	0	0	1
8346_4#3	2003	Vietnam	Schultz MB et al. Microb Genom 2016;2(3):e000050	25	no	no	no	no	no	no	yes	no	yes	no	no	no	no	no	no	no	no	no	no	no	no	no	0	0	0	0	1	0	0	1	0	0	1	1	1	1	0	0	1	0	0	0	0	0	1
8346_4#30	2004	Vietnam	Schultz MB et al. Microb Genom 2016;2(3):e000050	686	no	no	no	no	no	no	yes	no	yes	no	no	no	no	no	no	no	no	no	no	no	no	no	0	0	0	0	1	0	0	1	0	0	1	1	1	1	0	0	1	0	0	0	0	0	1
8346_4#31	2004	Vietnam	Schultz MB et al. Microb Genom 2016;2(3):e000050	686	no	no	no	no	no	no	yes	no	yes	no	no	no	no	no	no	no	no	no	no	no	no	no	0	0	0	0	1	0	0	1	0	0	1	1	1	1	0	0	1	0	0	0	0	0	1
8346_4#32	2004	Vietnam	Schultz MB et al. Microb Genom 2016;2(3):e000050	686	no	no	no	no	no	no	yes	no	yes	no	no	no	no	no	no	no	no	no	no	no	no	no	0	0	0	0	1	0	0	1	0	0	1	1	1	1	0	0	1	0	0	0	0	0	1
8346_4#33	2004	Vietnam	Schultz MB et al. Microb Genom 2016;2(3):e000050	686	no	no	no	no	no	no	yes	no	yes	no	no	no	no	no	no	no	no	no	no	no	no	no	0	0	0	0	1	0	0	1	0	0	1	1	1	1	0	0	1	0	0	0	0	0	1
8346_4#34	2004	Vietnam	Schultz MB et al. Microb Genom 2016;2(3):e000050	686	no	no	no	no	no	no	yes	no	yes	no	no	no	no	no	no	no	no	no	no	no	no	no	0	0	0	0	1	0	0	1	0	0	1	1	1	1	0	0	1	0	0	0	0	0	1
8346_4#35	2004	Vietnam	Schultz MB et al. Microb Genom 2016;2(3):e000050	686	no	no	no	no	no	no	yes	no	yes	no	no	no	no	no	no	no	no	no	no	no	no	no	0	0	0	0	1	0	0	1	0	0	1	1	1	1	0	0	1	0	0	0	0	0	1
8346_4#36	2004	Vietnam	Schultz MB et al. Microb Genom 2016;2(3):e000050	686	no	no	no	no	no	no	yes	no	no	no	no	no	no	no	no	no	no	no	no	no	no	no	0	0	0	0	0	0	0	1	0	0	1	1	1	1	0	0	1	0	0	0	0	0	1
8346_4#37	2004	Vietnam	Schultz MB et al. Microb Genom 2016;2(3):e000050	686	no	no	no	no	no	no	yes	no	no	no	no	no	no	no	no	no	no	no	no	no	no	no	0	0	0	0	0	0	0	1	0	0	1	1	1	1	0	0	1	0	0	0	0	0	1
8346_4#38	2004	Vietnam	Schultz MB et al. Microb Genom 2016;2(3):e000050	686	no	no	no	no	no	no	yes	no	no	no	no	no	no	no	no	no	no	no	no	no	no	no	0	0	0	0	0	0	0	1	0	0	1	1	1	1	0	0	1	0	0	0	0	0	1
8346_4#39	2004	Vietnam	Schultz MB et al. Microb Genom 2016;2(3):e000050	686	no	no	no	no	no	no	yes	no	yes	no	no	no	no	no	no	no	no	no	no	no	no	no	0	0	0	0	1	0	0	1	0	0	1	1	1	1	0	0	1	0	0	0	0	0	1
8346_4#4	2003	Vietnam	Schultz MB et al. Microb Genom 2016;2(3):e000050	10	no	no	no	no	yes	no	no	no	yes	yes	no	no	no	no	no	no	no	no	no	no	no	no	0	0	0	0	1	0	0	0	0	0	1	1	1	1	0	0	1	0	0	0	0	0	1
8346_4#40	2004	Vietnam	Schultz MB et al. Microb Genom 2016;2(3):e000050	216	no	no	no	no	no	no	no	no	no	no	no	no	no	yes	no	no	no	no	no	no	no	yes	1	0	0	1	1	0	0	1	0	0	0	0	0	1	1	0	1	0	0	0	0	0	1
8346_4#41	2004	Vietnam	Schultz MB et al. Microb Genom 2016;2(3):e000050	142	no	no	no	no	no	no	no	no	yes	no	no	no	no	no	no	no	no	no	no	no	no	no	1	0	0	1	1	0	0	1	0	0	0	0	0	1	1	0	1	0	0	0	0	0	1
8346_4#42	2004	Vietnam	Schultz MB et al. Microb Genom 2016;2(3):e000050	686	no	no	no	no	no	no	yes	no	yes	no	no	no	no	no	no	no	no	no	no	no	no	no	0	0	0	0	1	0	0	1	0	0	1	1	1	1	0	0	1	0	0	0	0	0	1
8346_4#43	2004	Vietnam	Schultz MB et al. Microb Genom 2016;2(3):e000050	686	no	no	no	no	no	no	yes	no	yes	no	no	no	no	no	no	no	no	no	no	no	no	no	0	0	0	0	1	0	0	1	0	0	1	1	1	1	0	0	1	0	0	0	0	0	1
8346_4#44	2004	Vietnam	Schultz MB et al. Microb Genom 2016;2(3):e000050	2	no	no	no	no	no	no	yes	no	yes	no	no	no	no	yes	no	no	no	no	no	no	no	no	0	1	1	1	1	1	0	0	1	0	1	1	1	1	0	0	1	0	0	0	0	0	1
8346_4#45	2004	Vietnam	Schultz MB et al. Microb Genom 2016;2(3):e000050	686	no	no	no	no	no	no	yes	no	yes	no	no	no	no	no	no	no	no	no	no	no	no	no	0	0	0	0	1	0	0	1	0	0	1	1	1	1	0	0	1	0	0	0	0	0	1
8346_4#46	2004	Vietnam	Schultz MB et al. Microb Genom 2016;2(3):e000050	686	no	no	no	no	no	no	yes	no	yes	no	no	no	no	no	no	no	no	no	no	no	no	no	0	0	0	0	1	0	0	1	0	0	1	1	1	1	0	0	1	0	0	0	0	0	1
8346_4#47	2004	Vietnam	Schultz MB et al. Microb Genom 2016;2(3):e000050	757	no	no	no	no	no	no	no	no	yes	no	no	no	no	no	no	no	no	no	no	no	no	no	0	0	0	0	1	0	0	1	0	0	1	1	1	1	0	0	1	0	0	0	0	0	1
8346_4#48	2004	Vietnam	Schultz MB et al. Microb Genom 2016;2(3):e000050	686	no	no	no	no	no	no	yes	no	yes	no	no	no	no	no	no	no	no	no	no	no	no	no	0	0	0	0	1	0	0	1	0	0	1	1	1	1	0	0	1	0	0	0	0	0	1
8346_4#49	2004	Vietnam	Schultz MB et al. Microb Genom 2016;2(3):e000050	686	no	no	no	no	no	no	yes	no	yes	no	no	no	no	no	no	no	no	no	no	no	no	no	0	0	0	0	1	0	0	1	0	0	1	1	1	1	0	0	1	0	0	0	0	0	1
8346_4#5	2003	Vietnam	Schultz MB et al. Microb Genom 2016;2(3):e000050	10	no	no	no	no	yes	no	no	no	yes	no	no	no	no	no	no	no	no	no	no	no	no	no	0	0	0	0	1	0	0	0	0	0	1	1	1	1	0	0	1	0	0	0	0	0	1
8346_4#51	2005	Vietnam	Schultz MB et al. Microb Genom 2016;2(3):e000050	2	no	no	no	no	no	no	no	no	no	no	no	no	no	yes	no	no	no	no	no	no	no	no	0	1	1	1	0	1	0	0	1	0	1	1	1	1	0	0	1	0	0	0	0	0	1
8346_4#55	2005	Vietnam	Schultz MB et al. Microb Genom 2016;2(3):e000050	686	no	no	no	no	no	no	yes	no	yes	no	no	no	no	no	no	no	no	no	no	no	no	no	0	0	0	0	1	0	0	1	0	0	1	1	1	1	0	0	1	0	0	0	0	0	1
8346_4#6	2003	Vietnam	Schultz MB et al. Microb Genom 2016;2(3):e000050	25	no	no	no	no	no	no	yes	no	yes	no	no	no	no	no	no	no	no	no	no	no	no	no	0	0	0	0	1	0	0	1	0	0	1	1	1	1	0	0	1	0	0	0	0	0	1
8346_4#60	2005	Vietnam	Schultz MB et al. Microb Genom 2016;2(3):e000050	2	no	no	no	no	no	no	no	no	no	no	no	no	no	yes	no	no	no	no	no	no	no	no	0	1	1	1	0	1	0	0	1	0	1	1	1	1	0	0	1	0	0	0	0	0	1
8346_4#62	2005	Vietnam	Schultz MB et al. Microb Genom 2016;2(3):e000050	2	no	no	no	no	no	no	no	no	no	no	no	no	no	yes	no	no	no	no	no	no	no	no	0	1	1	1	0	1	0	0	1	0	1	1	1	1	0	0	1	0	0	0	0	0	1
8346_4#63	2005	Vietnam	Schultz MB et al. Microb Genom 2016;2(3):e000050	2	no	no	no	no	no	no	no	no	no	no	no	no	no	yes	no	no	no	no	no	no	no	no	0	1	1	1	0	1	0	0	1	0	1	1	1	1	0	0	1	0	0	0	0	0	1
8346_4#64	2005	Vietnam	Schultz MB et al. Microb Genom 2016;2(3):e000050	2	no	no	no	no	no	no	no	no	yes	no	no	no	no	yes	no	no	no	no	no	no	no	no	0	1	1	1	0	1	0	0	1	0	1	1	1	1	0	0	1	0	0	0	0	0	1
8346_4#68	2005	Vietnam	Schultz MB et al. Microb Genom 2016;2(3):e000050	686	no	no	no	no	no	no	yes	no	yes	no	no	no	no	no	no	no	no	no	no	no	no	no	0	0	0	0	1	0	0	1	0	0	1	1	1	1	0	0	1	0	0	0	0	0	1
8346_4#69	2005	Vietnam	Schultz MB et al. Microb Genom 2016;2(3):e000050	2	no	no	no	no	no	no	no	no	yes	no	no	no	no	yes	no	no	no	no	no	no	no	no	0	1	1	1	0	1	0	0	1	0	1	1	1	1	0	0	1	0	0	0	0	0	1
8346_4#70	2005	Vietnam	Schultz MB et al. Microb Genom 2016;2(3):e000050	2	no	no	no	no	no	no	no	no	no	no	no	no	no	yes	no	no	no	no	no	no	no	no	0	1	1	1	0	1	0	0	1	0	1	1	1	1	0	0	1	0	0	0	0	0	1
8346_4#71	2005	Vietnam	Schultz MB et al. Microb Genom 2016;2(3):e000050	2	no	no	no	no	no	no	no	no	no	no	no	no	no	yes	no	no	no	no	no	no	no	no	0	1	1	1	0	1	0	0	1	0	1	1	1	1	0	0	1	0	0	0	0	0	1
8346_4#72	2005	Vietnam	Schultz MB et al. Microb Genom 2016;2(3):e000050	2	no	no	no	no	no	no	no	no	no	yes	no	no	no	no	no	no	no	no	no	no	yes	no	0	0	1	1	0	1	0	0	1	0	1	1	1	1	0	0	1	0	0	0	0	0	1
8346_4#73	2005	Vietnam	Schultz MB et al. Microb Genom 2016;2(3):e000050	2	no	no	no	no	no	no	no	no	no	no	no	no	no	yes	no	no	no	no	no	no	no	no	0	1	1	1	0	1	0	0	1	0	1	1	1	1	0	0	1	0	0	0	0	0	1
8346_4#74	2005	Vietnam	Schultz MB et al. Microb Genom 2016;2(3):e000050	2	no	no	no	no	no	no	no	no	no	no	no	no	no	yes	no	no	no	no	no	no	no	no	0	1	1	1	0	1	0	0	1	0	1	1	1	1	0	0	1	0	0	0	0	0	1
8346_4#76	2005	Vietnam	Schultz MB et al. Microb Genom 2016;2(3):e000050	25	no	no	no	no	yes	no	yes	no	yes	no	no	no	no	no	no	no	no	no	no	no	no	no	0	0	0	0	1	0	0	1	0	0	1	1	1	1	0	0	1	0	0	0	0	0	1
8346_4#77	2005	Vietnam	Schultz MB et al. Microb Genom 2016;2(3):e000050	2	no	no	no	no	no	no	no	no	yes	yes	no	no	no	no	no	no	no	no	no	no	yes	no	0	1	1	1	1	1	0	0	1	0	1	1	1	1	0	0	1	0	0	0	0	0	1
8346_4#78	2005	Vietnam	Schultz MB et al. Microb Genom 2016;2(3):e000050	2	no	no	no	no	no	no	no	no	no	yes	no	no	no	no	no	no	no	no	no	no	yes	no	0	1	1	1	0	1	0	0	1	0	1	1	1	1	0	0	1	0	0	0	0	0	1
8346_4#79	2005	Vietnam	Schultz MB et al. Microb Genom 2016;2(3):e000050	16	no	no	no	no	no	no	no	no	no	no	yes	no	no	yes	no	no	no	no	no	no	no	no	1	0	0	1	1	0	0	0	0	0	0	1	1	1	0	0	1	1	0	0	0	0	1
8346_4#80	2005	Vietnam	Schultz MB et al. Microb Genom 2016;2(3):e000050	25	no	no	no	no	no	no	yes	no	yes	no	no	no	no	no	no	no	no	no	no	no	no	no	0	0	0	1	0	0	0	1	0	0	1	1	1	1	0	0	1	0	0	0	0	0	1
8346_4#81	2005	Vietnam	Schultz MB et al. Microb Genom 2016;2(3):e000050	2	no	no	no	no	no	no	no	no	no	no	no	no	no	yes	no	no	no	no	no	no	no	no	0	1	1	1	0	1	0	0	1	0	1	1	1	1	0	0	1	0	0	0	0	0	1
8346_4#82	2005	Vietnam	Schultz MB et al. Microb Genom 2016;2(3):e000050	10	no	no	no	no	yes	no	yes	no	no	no	no	no	no	yes	no	no	no	no	no	no	no	no	0	0	0	0	0	0	0	1	0	0	1	1	1	1	0	0	1	0	0	0	0	0	1
8346_4#83	2005	Vietnam	Schultz MB et al. Microb Genom 2016;2(3):e000050	25	no	no	no	no	no	no	yes	no	no	yes	no	no	no	no	no	no	no	no	no	no	no	no	0	0	0	0	0	0	0	1	0	0	1	1	1	1	0	0	1	0	0	0	0	0	1
8346_4#84	2005	Vietnam	Schultz MB et al. Microb Genom 2016;2(3):e000050	10	no	no	no	no	yes	no	yes	no	no	no	no	no	no	yes	no	no	no	no	no	no	no	no	0	0	0	0	0	0	0	1	0	0	1	0	1	1	0	0	1	0	0	0	0	0	1
8346_4#85	2005	Vietnam	Schultz MB et al. Microb Genom 2016;2(3):e000050	10	no	no	no	no	yes	no	yes	no	no	no	no	no	no	yes	no	no	no	no	no	no	no	no	0	0	0	0	0	0	0	1	0	0	1	1	1	1	0	0	1	0	0	0	0	0	1
8346_4#86	2005	Vietnam	Schultz MB et al. Microb Genom 2016;2(3):e000050	25	no	no	no	no	yes	no	yes	no	yes	no	no	no	no	no	no	no	no	no	no	no	no	no	0	0	0	0	1	0	0	1	0	0	1	1	1	1	0	0	1	0	0	0	0	0	1
8346_4#87	2005	Vietnam	Schultz MB et al. Microb Genom 2016;2(3):e000050	575	no	no	no	no	yes	no	yes	no	yes	no	no	no	no	yes	no	no	no	no	no	no	no	no	0	0	0	0	1	0	0	1	0	0	1	1	1	1	0	0	1	0	0	0	0	0	1
8346_4#88	2005	Vietnam	Schultz MB et al. Microb Genom 2016;2(3):e000050	10	no	no	no	no	yes	no	yes	no	yes	no	no	no	no	yes	no	no	no	no	no	no	no	no	0	0	0	0	1	0	0	1	0	0	1	0	1	1	0	0	1	0	0	0	0	0	1
8346_4#89	2005	Vietnam	Schultz MB et al. Microb Genom 2016;2(3):e000050	10	no	no	no	no	yes	no	yes	no	no	no	no	no	no	yes	no	no	no	no	no	no	no	no	0	0	0	0	0	0	0	1	0	0	1	1	1	1	0	0	1	0	0	0	0	0	1
8346_4#90	2005	Vietnam	Schultz MB et al. Microb Genom 2016;2(3):e000050	109*	no	no	no	no	yes	no	yes	no	yes	no	no	no	no	no	no	no	no	no	no	no	no	no	0	0	0	0	1	0	0	1	0	0	1	1	1	0	0	0	1	0	0	0	0	0	1
8346_4#92	2005	Vietnam	Schultz MB et al. Microb Genom 2016;2(3):e000050	686	no	no	no	no	no	no	yes	no	yes	no	no	no	no	no	no	no	no	no	no	no	no	no	0	0	0	0	1	0	0	1	0	0	1	1	1	1	0	0	1	0	0	0	0	0	1
8346_4#93	2005	Vietnam	Schultz MB et al. Microb Genom 2016;2(3):e000050	2	no	no	no	no	no	no	no	no	no	no	no	no	no	no	no	no	no	no	no	no	yes	no	0	1	1	1	0	1	0	0	1	0	1	1	1	1	0	0	1	0	0	0	0	0	1
8346_4#94	2005	Vietnam	Schultz MB et al. Microb Genom 2016;2(3):e000050	25	no	no	no	no	no	no	yes	no	no	yes	no	no	no	no	no	no	no	no	no	no	no	no	0	0	0	0	0	0	0	1	0	0	1	1	1	1	0	0	1	0	0	0	0	0	1
8346_4#95	2005	Vietnam	Schultz MB et al. Microb Genom 2016;2(3):e000050	109*	no	no	no	no	yes	no	yes	no	yes	no	no	no	no	no	no	no	no	no	no	no	no	no	0	0	0	0	1	0	0	1	0	0	1	1	1	0	0	0	1	0	0	0	0	0	1
8346_4#96	2005	Vietnam	Schultz MB et al. Microb Genom 2016;2(3):e000050	686	no	no	no	no	no	no	yes	no	yes	no	no	no	no	no	no	no	no	no	no	no	no	no	0	0	0	0	1	0	0	1	0	0	1	1	1	1	0	0	1	0	0	0	0	0	1
9262_1#32	2006	Vietnam	Schultz MB et al. Microb Genom 2016;2(3):e000050	575	no	no	no	no	yes	no	yes	no	yes	no	no	no	no	yes	no	yes	no	no	no	no	no	no	0	0	0	0	1	0	0	1	0	0	1	1	1	1	0	0	1	0	0	0	0	0	1
9262_1#33	2006	Vietnam	Schultz MB et al. Microb Genom 2016;2(3):e000050	25	no	no	no	no	no	no	yes	no	yes	yes	no	no	no	no	no	no	no	no	no	no	no	no	0	0	0	0	0	0	0	1	0	0	1	1	1	1	0	0	1	0	0	0	0	0	1
9262_1#34	2006	Vietnam	Schultz MB et al. Microb Genom 2016;2(3):e000050	25	no	no	no	no	no	no	yes	no	no	yes	no	no	no	yes	no	no	no	no	no	no	no	no	0	0	0	0	0	0	0	1	0	0	1	1	1	1	0	0	1	0	0	0	0	0	1
9262_1#35	2006	Vietnam	Schultz MB et al. Microb Genom 2016;2(3):e000050	575	no	no	no	no	yes	no	yes	no	yes	no	no	no	no	yes	no	no	no	no	no	no	no	no	0	0	0	0	1	0	0	1	0	0	1	0	1	1	0	0	1	0	0	0	0	0	1
9262_1#36	2006	Vietnam	Schultz MB et al. Microb Genom 2016;2(3):e000050	575	no	no	no	no	yes	no	yes	no	yes	no	no	no	no	yes	no	no	no	no	no	no	no	no	0	0	0	0	1	0	0	1	0	0	1	1	1	1	0	0	1	0	0	0	0	0	1
9262_1#37	2006	Vietnam	Schultz MB et al. Microb Genom 2016;2(3):e000050	575	no	no	no	no	yes	no	yes	no	yes	no	no	no	no	yes	no	no	no	no	no	no	no	no	0	0	0	0	1	0	0	1	0	0	1	1	1	1	0	0	1	0	0	0	0	0	1
9262_1#38	2006	Vietnam	Schultz MB et al. Microb Genom 2016;2(3):e000050	2	no	no	no	no	no	no	no	no	no	no	no	no	no	no	no	no	no	no	no	no	yes	no	0	1	1	1	0	1	0	0	1	0	1	1	1	1	0	0	1	0	0	0	0	0	1
GCA_000021145	1994	USA	Adams MD et al J Bacteriol 2008;190(24):8053-64	1	no	no	no	no	no	no	no	no	no	no	no	no	no	no	no	no	no	no	no	no	no	no
GCA_000069245	2001	France	Vallenet D et al. PLoS One 2008;3(3):e1805	1	yes	no	no	no	no	no	no	no	no	no	yes	no	no	no	no	no	yes	yes	no	no	no	no
GCA_000163355			iHMP Research Network Consortium. Cell Host Microbe 2014;16(3):276-89	81	no	no	no	no	no	no	no	no	yes	no	no	yes	no	no	no	no	no	yes	no	no	yes	no
GCA_000163375			iHMP Research Network Consortium. Cell Host Microbe 2014;16(3):276-89	81	no	no	no	no	no	no	no	no	no	no	no	yes	no	no	no	no	no	no	no	no	yes	no
GCA_000177695	2004	USA	Adams MD et al J Bacteriol 2008;190(24):8053-64	1	no	no	no	yes	no	no	no	no	no	no	no	no	no	no	no	no	no	yes	no	no	no	no
GCA_000177715	2003	USA	Adams MD et al J Bacteriol 2008;190(24):8053-64	20	no	no	no	no	no	yes	no	no	yes	yes	no	no	no	no	no	no	no	yes	no	no	no	no
GCA_000177735	2004	USA	Adams MD et al J Bacteriol 2008;190(24):8053-64	1	no	no	no	no	no	no	no	no	no	yes	no	no	no	no	no	no	no	yes	no	no	no	no
GCA_000241685	2008	USA	Zurawski DV et al. J Bacteriol 2012;194(6):1619-20	1	no	no	no	no	no	no	no	no	no	yes	no	no	no	no	no	no	no	no	no	no	no	no
GCA_000286615	2007	Canada	Chan AP et al. Genome Biol 2015;16:143	1	no	no	no	no	no	no	no	no	no	no	no	no	no	no	no	no	no	yes	no	no	no	no
GCA_000297595	2008	Iraq	Chan AP et al. Genome Biol 2015;16:143	1	no	no	no	no	no	no	no	no	no	yes	no	no	no	no	no	no	no	no	no	no	no	no
GCA_000301435	2007		Sahl JW et a. PLoS One 2013;8(1):e54287	1	no	no	no	no	no	no	no	no	no	no	no	no	no	no	no	no	no	yes	no	no	no	no
GCA_000302035	2007		Sahl JW et a. PLoS One 2013;8(1):e54287	1	no	no	no	no	no	no	no	no	yes	no	no	no	no	no	no	no	no	yes	no	no	no	no
GCA_000305215	2003	Germany	Chan AP et al. Genome Biol 2015;16:143	19	no	no	no	no	no	no	no	yes	no	no	no	no	no	no	no	no	no	no	no	no	no	no
GCA_000305315	2006	USA	Chan AP et al. Genome Biol 2015;16:143	20	no	no	no	no	no	no	no	no	no	yes	no	no	no	no	no	no	no	no	no	no	no	no
GCA_000309195	2006	USA	Chan AP et al. Genome Biol 2015;16:143	19	no	no	no	no	no	no	no	yes	no	yes	no	no	no	no	no	no	no	no	no	no	no	no
GCA_000309275	2007	Canada	Chan AP et al. Genome Biol 2015;16:143	1	no	no	no	no	no	no	no	no	no	no	no	no	no	no	no	no	no	no	no	no	no	no
GCA_000369185	1984	Netherlands	Chan AP et al. Genome Biol 2015;16:143	1	no	no	no	no	no	no	yes	no	yes	no	no	no	no	no	no	no	no	yes	no	no	no	no
GCA_000369325	1994	Czech Republic	Chan AP et al. Genome Biol 2015;16:143	1	no	no	no	no	no	no	no	no	no	no	no	no	no	no	no	no	no	no	no	no	no	no
GCA_000369365	2011	Czech Republic	Chan AP et al. Genome Biol 2015;16:143	1	no	no	no	no	no	no	no	no	no	yes	no	no	no	no	no	no	no	yes	yes	no	no	no
GCA_000830055	1982	UK	Holt KE et al. Genome Announc 2015;3(2):e00032	1	no	no	no	no	no	no	no	no	no	no	no	no	no	no	no	no	no	yes	no	no	no	no
GCA_001399655	2008	Australia	Hamidian M et al. Genome Announc 2015;3(6):e01478-15	81	no	no	no	no	no	no	no	no	yes	no	no	yes	no	no	no	no	no	yes	no	no	no	no
[truncated: 27 more columns]
